# Supplementary material for: Palladium(ii)-catalysed tandem cyclisation of electron-deficient aromatic enynes
Source: Royal Society of Chemistry journal article supplement (doi:10.1039/c2cc35114e), 2012-01-01
Supplement: c2cc35114e.pdf [file c2cc35114e.pdf]

## SUPPORTING INFORMATION

### Palladium(II)-Catalysed Electrophilic Cyclisation of Electron-Deficient Aromatic Enynes

Na Wu,<sup>a,b</sup> Andrei S. Batsanov,<sup>b</sup> Antonios Messinis,<sup>b</sup> Andrew Whiting,<sup>b,\*</sup>  
Zhen Yang,<sup>a,\*</sup> and Todd B. Marder<sup>b,\*,†</sup>

<sup>a</sup> Key Laboratory of Bioorganic Chemistry and Molecular Engineering of Ministry of Education and Beijing National Laboratory for Molecular Science (BNLMS), College of Chemistry, Peking University, Beijing 10087, China

<sup>b</sup> Department of Chemistry, Durham University, South Road, Durham DH1 3LE, U.K.

<sup>†</sup> Current address: Institut für Anorganische Chemie, Julius-Maximilians-Universität Würzburg, Am Hubland, 97074 Würzburg, Germany

*todd.marder@uni-wuerzburg.de; zyang@pku.edu.cn*

#### Contents

|                                                                                                                                          |            |
|------------------------------------------------------------------------------------------------------------------------------------------|------------|
| <b>1. General information.....</b>                                                                                                       | <b>S2</b>  |
| <b>2. Experimental procedures and characterisation data.....</b>                                                                         | <b>S3</b>  |
| <b>2.1 Synthesis of substituted styrene alkynone precursors<br/>        and characterisation data.....</b>                               | <b>S3</b>  |
| <b>2.2 General procedure for synthesis of substituted styrene<br/>        alkynone substrates and product characterisation data.....</b> | <b>S4</b>  |
| <b>2.3 General procedure for substituted styrene alkynone cyclisations<br/>        and characterisation data.....</b>                    | <b>S10</b> |
| <b>2.4 Procedure for Luche reduction of cyclisation product<br/>        and characterisation data.....</b>                               | <b>S14</b> |
| <b>2.5 References.....</b>                                                                                                               | <b>S15</b> |
| <b>3. <sup>1</sup>H and <sup>13</sup>C-NMR spectra for new compounds.....</b>                                                            | <b>S16</b> |
| <b>4. X-ray molecular structures.....</b>                                                                                                | <b>S89</b> |

## 1. General information

Reactions were performed under nitrogen unless otherwise stated. All reagents were purchased from Aldrich and used as received. Solvents (AR grade) were used as received.  $^1\text{H}$  NMR and  $^{13}\text{C}$   $\{^1\text{H}\}$  spectra were recorded using Bruker Avance 400, Bruker DRX 500, Avance 600 or Varian VNMRS 700 spectrometers in  $\text{CDCl}_3$  with residual solvent protons (7.26 ppm) or the carbon resonance (77.16 ppm) used to reference the spectra. Chromatography was carried out using silica gel (Silicagel LC60A 40-63  $\mu\text{m}$ ) obtained from Fluorochem. The removal of solvent was performed on a rotary evaporator under vacuum. IR spectra were recorded on a Perkin-Elmer 1615 FTRIR spectrophotometer. Melting points were determined using an Electrothermal melting point apparatus. Low resolution mass spectrometry was carried out on a Waters TQD equipped with Acquity UPLC and an electrospray ion source and high resolution mass spectrometry was performed on a Waters LCT Premier XE equipped with Acquity UPLC and a lock-mass electrospray ion source.

## 2. Experimental procedures and characterisation data

### 2.1 Synthesis of substituted styrene alkynone precursors and characterisation data

2-Vinylbenzoic acid, (*E*, *Z*)-2-styrylbenzoic acid and (*E*, *Z*)-2-(4-methylstyryl)benzoic acid were prepared according to literature methods.<sup>1,2</sup>

#### *tert*-Butyl 2-iodobenzoate

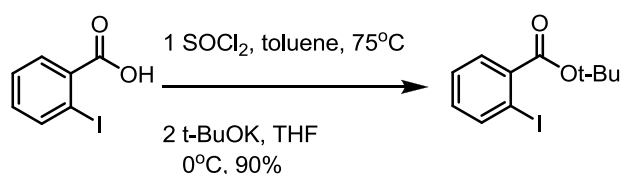

To a solution of 2-iodobenzoic acid (4.96 g, 20 mmol) in toluene (100 mL) was added 2 drops of *N,N*-dimethylformamide and thionyl chloride (1.69 mL, 24 mmol) and the reaction was stirred at  $75^\circ\text{C}$  overnight. After concentration *in vacuo*, the 2-iodobenzoyl chloride was added dropwise to a solution of potassium *t*-butoxide in THF (100 mL) at  $0^\circ\text{C}$  under nitrogen protection for 0.5 h. Filtration through a Celite pad and concentration *in vacuo* gave the product as a colorless oil (5.46 g, 90%):  $^1\text{H}$  NMR (400 MHz,  $\text{CDCl}_3$ )  $\delta$  1.62 (s, 9H), 7.08-7.13 (m, 1H), 7.35-7.39 (m, 1H), 7.67-7.70 (m, 1H), 7.93-7.95 (m, 1H);  $^{13}\text{C}$  NMR (101 MHz,  $\text{CDCl}_3$ )  $\delta$  28.1, 82.6, 93.4, 127.8, 130.4, 131.9, 137.4, 140.9, 166.1; FT-IR (neat)  $\nu$  2079, 1713, 1296, 1128  $\text{cm}^{-1}$ ; HRMS (ESI<sup>+</sup>)  $m/z$  Calcd for  $\text{C}_{11}\text{H}_{14}\text{IO}_2$  [ $\text{M}+\text{H}^+$ ] 305.0033 found 305.0035.

**(E)-tert-Butyl 2-(3-ethoxy-3-oxoprop-1-enyl)benzoate**

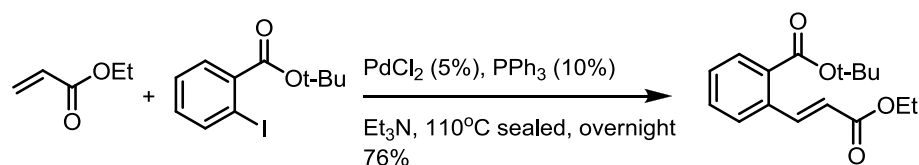

To a solution of PdCl<sub>2</sub> (0.159 g, 0.9 mmol) and PPh<sub>3</sub> (0.472 g, 1.8 mmol) in dry Et<sub>3</sub>N (40 mL) under N<sub>2</sub> protection was added *tert*-butyl 2-iodobenzoate (5.46 g, 18 mmol) and ethyl acrylate (2.1 mL, 19.8 mmol). The reaction mixture was stirred at 110 °C in a sealed tube overnight. After cooling and concentrating *in vacuo*, the residue was purified by flash chromatography on silica gel (2.5 cm × 20 cm, eluting with ethyl acetate/n-hexane = 1:7, R<sub>f</sub> (EtOAc/hexane (1:5)) = 0.53) to give the corresponding Heck coupling product as a yellow oil (3.78 g, 76%): <sup>1</sup>H NMR (600 MHz, CDCl<sub>3</sub>) δ 1.33 (t, *J* = 7 Hz, 3H), 1.61 (s, 9H), 4.27 (q, *J* = 7 Hz, 2H), 6.27 (d, *J* = 16 Hz, 1H), 7.39-7.42 (m, 1H), 7.47-7.50 (m, 1H), 7.54-7.55 (m, 1H), 7.88-7.89 (m, 1H), 8.38 (d, *J* = 16 Hz, 1H); <sup>13</sup>C NMR (150 MHz, CDCl<sub>3</sub>) δ 14.4, 28.3, 60.6, 82.3, 120.5, 127.8, 129.4, 130.7, 131.8, 132.3, 135.8, 144.4, 166.4, 166.7; FT-IR (neat) ν 1706, 1636, 1367, 1298, 1268, 1162, 765 cm<sup>-1</sup>; HRMS (ESI<sup>+</sup>) *m/z* Calcd for C<sub>16</sub>H<sub>20</sub>O<sub>4</sub>Na [M+Na<sup>+</sup>] 299.1259 found 299.1266.

**(E)-2-(3-Ethoxy-3-oxoprop-1-enyl)benzoic acid**

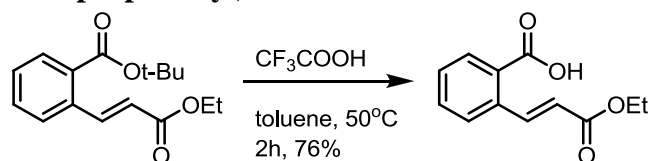

Trifluoroacetic acid (8 mL) was injected into *tert*-butyl 2-(3-ethoxy-3-oxoprop-1-enyl)benzoate in toluene (50 mL) and the reaction was stirred at 50 °C for 2 h. After concentration *in vacuo* and purification by flash chromatography on silica gel (2.5 cm × 20 cm, eluting with ethyl acetate/n-hexane = 1:3, R<sub>f</sub> (EtOAc/hexane (1:5)) = 0.19), the product was isolated as a colorless oil (3.78 g, 76%): <sup>1</sup>H NMR (400 MHz, CDCl<sub>3</sub>) δ 1.35 (t, *J* = 7 Hz, 3H), 4.29 (q, *J* = 7 Hz, 2H), 6.33 (d, *J* = 16 Hz, 1H), 7.45-7.49 (m, 1H), 7.56-7.63 (m, 2H), 8.10-8.12 (m, 1H), 8.56 (d, *J* = 16 Hz, 1H), 10.8 (br.s, 1H); <sup>13</sup>C NMR (150 MHz, CDCl<sub>3</sub>) δ 14.4, 60.8, 121.5, 128.3, 128.7, 129.5, 131.8, 133.3, 137.3, 143.9, 166.8, 172.0; FT-IR (neat) ν 2982, 2656, 2360, 1706, 1636, 1304, 1170, 761 cm<sup>-1</sup>; HRMS (ESI<sup>+</sup>) *m/z* Calcd for C<sub>12</sub>H<sub>13</sub>O<sub>4</sub> [M+H<sup>+</sup>] 221.0814 found 221.0803.

**(E)-Methyl 2-(4-(trifluoromethyl)styryl)benzoate**

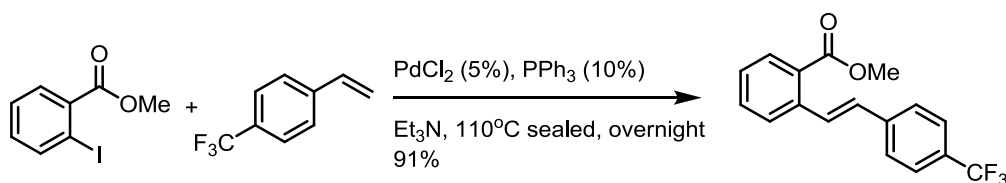

To a solution of PdCl<sub>2</sub> (0.035 g, 0.2 mmol) and PPh<sub>3</sub> (0.1048 g, 0.4 mmol) in dry

Et<sub>3</sub>N (4 mL) under N<sub>2</sub> protection was added methyl 2-iodobenzoate (0.61 mL, 4 mmol) and 1-(trifluoromethyl)-4-vinyl benzene (0.71 mL, 4.8 mmol). The reaction mixture was stirred at 110 °C in a sealed tube overnight. The reaction was cooled, concentrated *in vacuo* and the residue purified by flash chromatography on silica gel (2.5 cm × 20 cm, eluting with ethyl acetate/n-hexane = 1:20, R<sub>f</sub> (EtOAc/hexane (1:15)) = 0.50) to give the corresponding Heck coupling product as a white solid (1.12 g, 91%); m.p. 73-74 °C; <sup>1</sup>H NMR (400 MHz, CDCl<sub>3</sub>) δ 3.94 (s, 3H), 7.00 (d, *J* = 16 Hz, 1H), 7.37 (t, *J* = 8 Hz, 1H), 7.53 (d, *J* = 8 Hz, 1H), 7.62 (dd, *J*<sub>1</sub> = 4 Hz, *J*<sub>2</sub> = 9 Hz, 4H), 7.71 (d, *J* = 8 Hz, 1H), 7.98 (d, *J* = 8 Hz, 1H), 8.12 (d, *J* = 16 Hz, 1H); <sup>13</sup>C NMR (150 MHz, CDCl<sub>3</sub>) δ 52.2, 124.4 (q, *J*<sub>CF</sub> = 270 Hz, CF<sub>3</sub>), 125.6 (q, *J*<sub>CF</sub> = 4 Hz, arene C), 127.0, 127.2, 127.8, 128.8, 129.5 (q, *J*<sub>CF</sub> = 32 Hz, arene C), 129.8, 130.3, 130.9, 132.4, 138.8, 141.0, 167.7; FT-IR (neat) ν 2956, 1713, 1614, 1323, 1105, 951, 821 cm<sup>-1</sup>; HRMS (ESI<sup>+</sup>) *m/z* Calcd for C<sub>17</sub>H<sub>14</sub>O<sub>2</sub>F<sub>3</sub> [M+H<sup>+</sup>] 307.0940 found 307.0941.

### (*E*)-2-(4-(Trifluoromethyl)styryl)benzoic acid

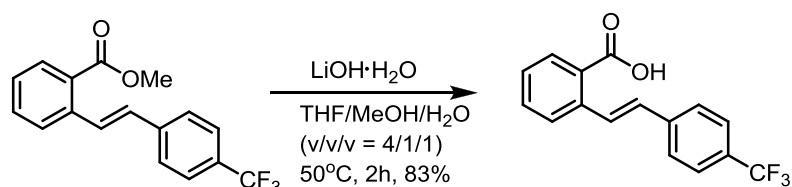

(*E*)-Methyl 2-(4-(trifluoromethyl)styryl)benzoate (0.98 g, 3.2 mmol) was dissolved in 6 mL of THF:MeOH:H<sub>2</sub>O (4:1:1, v:v:v) and LiOH (405 mg, 9.6 mmol) was added at room temperature. The reaction mixture was then heated to 50 °C for 2 h. After the reaction mixture was cooled to room temperature, it was acidified to pH 6 using 1M HCl. The product was extracted with ethyl acetate (2 x 20 mL) and then washed with water and brine. The extract was dried over anhydrous MgSO<sub>4</sub> and the solvent was evaporated *in vacuo* to give the stilbene carboxylic acid as a white solid (0.78 g, 83%); m.p. 132-134 °C; <sup>1</sup>H NMR (600 MHz, CDCl<sub>3</sub>) δ 7.04 (d, *J* = 16 Hz, 1H), 7.43 (t, *J* = 8 Hz, 1H), 7.60-7.66 (m, 5H), 7.76 (d, *J* = 8 Hz, 1H), 8.14 (d, *J* = 8 Hz, 1H), 8.16 (d, *J* = 16 Hz, 1H), 11.72 (br s, 1H); <sup>13</sup>C NMR (150 MHz, CDCl<sub>3</sub>) δ 124.3 (q, *J*<sub>CF</sub> = 270 Hz, CF<sub>3</sub>), 125.8 (q, *J*<sub>CF</sub> = 4 Hz, arene C), 126.7, 127.2, 127.7, 128.0, 129.8 (q, *J*<sub>CF</sub> = 32 Hz, arene C), 130.3, 130.4, 131.9, 133.5, 139.8, 140.9, 172.2; FT-IR (neat) ν 1682, 1415, 1327, 1108, 1069, 821, 746, 649 cm<sup>-1</sup>; HRMS (ASAP<sup>+</sup>) *m/z* Calcd for C<sub>16</sub>H<sub>12</sub>O<sub>2</sub>F<sub>3</sub> [M+H<sup>+</sup>] 293.0789 found 293.0788.

## 2.2 General procedure for synthesis of substituted styrene alkynone substrates and product characterisation data

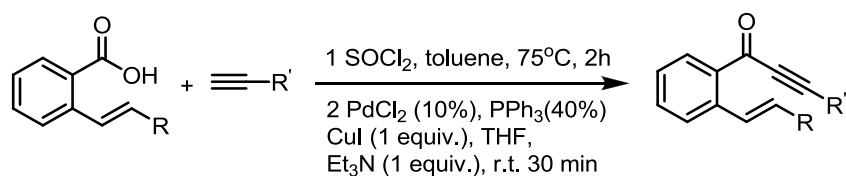

To a solution of substituted 2-vinylbenzoic acid (1 mmol) in dry toluene (10 mL) was added 2 drops of *N,N*-dimethylformamide and thionyl chloride (0.09 mL, 1.2 mmol)

and the reaction mixture was stirred at 75 °C for 2 h. Evaporation *in vacuo* gave the acid chloride. To a solution of the acid chloride in THF (10 mL), PdCl<sub>2</sub> (17.6 mg, 0.1 mmol), PPh<sub>3</sub> (104.8 mg, 0.4 mmol) and CuI (190 mg, 1 mmol) under N<sub>2</sub> protection was added stoichiometric amounts of the different alkynes. Finally, Et<sub>3</sub>N (0.14 mL, 1 mmol) was added dropwise under N<sub>2</sub> protection. The reaction was stirred at room temperature for 0.5 h, concentrated *in vacuo* and the residue was purified by flash chromatography on silica gel to give the corresponding substituted styrene alkynones.

**(E)-Ethyl 3-(2-hept-2-ynoylphenyl)acrylate**

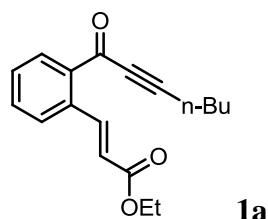

Silica gel purification (2.5 cm × 20 cm, eluted with ethyl acetate/n-hexane = 1:8, R<sub>f</sub> (EtOAc/hexane (1:5)) = 0.40) gave a brown yellow oil (45%): <sup>1</sup>H NMR (600 MHz, CDCl<sub>3</sub>) δ 0.96 (t, *J* = 7 Hz, 3H), 1.34 (t, *J* = 7 Hz, 3H), 1.47-1.51 (m, 2H), 1.63-1.66 (m, 2H), 2.49 (t, *J* = 7 Hz, 2H), 4.27 (q, *J* = 7 Hz, 2H), 6.29 (d, *J* = 16 Hz, 1H), 7.49-7.51 (m, 1H), 7.55-7.57 (m, 2H), 8.19 (d, *J* = 8 Hz, 1H), 8.41 (d, *J* = 16 Hz, 1H); <sup>13</sup>C NMR (150 MHz, CDCl<sub>3</sub>) δ 13.6, 14.5, 19.1, 22.2, 29.9, 60.7, 81.1, 97.5, 121.6, 128.4, 129.4, 132.6, 133.1, 136.3, 136.4, 143.9, 166.6, 179.2; FT-IR (neat) ν 2203, 1711, 1636, 1242, 1176, 912, 762, 714 cm<sup>-1</sup>; HRMS (ESI<sup>+</sup>) *m/z* Calcd for C<sub>18</sub>H<sub>21</sub>O<sub>3</sub> [M+H<sup>+</sup>] 285.1485 found 285.1489.

**(E,Z)-3-Cyclohexyl-1-(2-(4-methylstyryl)phenyl)prop-2-yn-1-one**

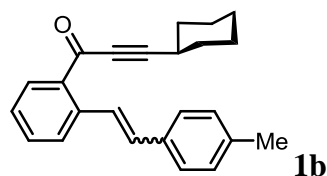

Silica gel purification (2.5 cm × 25 cm, eluted with ethyl acetate/n-hexane = 1:50, R<sub>f</sub> (EtOAc/hexane (1:10)) = 0.63) gave a brown oil (21%): <sup>1</sup>H NMR (600 MHz, CDCl<sub>3</sub>) δ 1.35-1.37 (m, 3H), 1.55-1.62 (m, 3H), 1.72-1.78 (m, 2H), 1.87-1.92 (m, 2H), 2.27 (s, 1H), 2.37 (s, 2H), 2.64-2.69 (m, 1H), 6.63 (d, *J* = 12 Hz, 0.3H), 6.94-6.97 (m, 1.3H), 7.00-7.03 (m, 1H), 7.17 (d, *J* = 8 Hz, 1.3H), 7.24 (d, *J* = 7 Hz, 0.3H), 7.32 (dt, *J*<sub>1</sub> = 2 Hz, *J*<sub>2</sub> = 7 Hz, 0.3H), 7.34-7.38 (m, 1H), 7.45-7.46 (m, 1.3H), 7.52-7.54 (m, 0.7H), 7.72 (d, *J* = 8 Hz, 0.7H), 7.96 (dd, *J* = 16 Hz, 0.7H), 8.15-8.17 (m, 0.7H), 8.21-8.22 (m, 0.3H); <sup>13</sup>C NMR (150 MHz, CDCl<sub>3</sub>) δ 21.3, 21.4, 24.9, 24.9, 25.8, 25.8, 29.5, 29.6, 31.8, 31.8, 81.1, 81.6, 99.9, 100.1, 126.6, 127.0, 127.1, 127.2, 128.9, 129.3, 129.5, 129.8, 130.3, 131.5, 131.9, 132.6, 132.6, 132.7, 132.8, 134.0, 134.8, 135.4, 136.0, 136.8, 138.0, 139.3, 139.6, 179.4, 180.3; FT-IR (neat) ν 2924, 2854, 2200, 1630, 1446, 1239, 918, 806 cm<sup>-1</sup>; HRMS (ESI<sup>+</sup>) *m/z* Calcd for C<sub>24</sub>H<sub>25</sub>O<sub>1</sub> [M+H<sup>+</sup>] 329.1905 found 329.1900.

**(E)-Ethyl 3-(2-(4,4-dimethylpent-2-ynoyl)phenyl)acrylate**

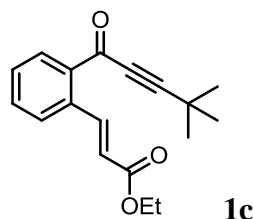

Silica gel purification (2.5 cm × 20 cm, eluted with ethyl acetate/n-hexane = 1:5,  $R_f$  (EtOAc/hexane (1:5)) = 0.50) gave a yellow oil (37%):  $^1\text{H}$  NMR (700 MHz,  $\text{CDCl}_3$ )  $\delta$  1.34 (t,  $J$  = 7 Hz, 3H), 1.36 (s, 9H), 4.28 (q,  $J$  = 7 Hz, 2H), 6.30 (d,  $J$  = 16 Hz, 1H), 7.49-7.51 (m, 1H), 7.55-7.58 (m, 2H), 8.13-8.14 (m, 1H), 8.39 (d,  $J$  = 16 Hz, 1H);  $^{13}\text{C}$  NMR (176 MHz,  $\text{CDCl}_3$ )  $\delta$  14.5, 28.2, 30.2, 60.7, 79.7, 104.6, 121.6, 128.4, 129.4, 132.4, 133.0, 136.2, 136.7, 143.8, 166.6, 179.4; FT-IR (neat)  $\nu$  2972, 2208, 1713, 1640, 1263, 1176, 759  $\text{cm}^{-1}$ ; HRMS ( $\text{ESI}^+$ )  $m/z$  Calcd for  $\text{C}_{18}\text{H}_{21}\text{O}_3$  285.1485 [ $\text{M}+\text{H}^+$ ] found 285.1489.

**(E)-Ethyl 3-(2-(3-cyclopentylpropioloyl)phenyl)acrylate**

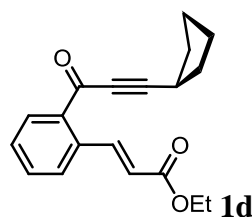

Silica gel purification (2.5 cm × 20 cm, eluted with ethyl acetate/n-hexane = 1:5,  $R_f$  (EtOAc/hexane (1:5)) = 0.38) gave a brown oil (39%):  $^1\text{H}$  NMR (600 MHz,  $\text{CD}_2\text{Cl}_2$ )  $\delta$  1.32 (t,  $J$  = 7 Hz, 3H), 1.64 (m, 2H), 1.79 (m, 4H), 2.0-2.1 (m, 2H), 2.92 (t,  $J$  = 7 Hz, 1H), 4.25 (q,  $J$  = 7 Hz, 2H), 6.30 (d,  $J$  = 16 Hz, 1H), 7.51-7.53 (m, 1H), 7.57-7.60 (m, 2H), 8.19 (d,  $J$  = 8 Hz, 1H), 8.32 (d,  $J$  = 16 Hz, 1H);  $^{13}\text{C}$  NMR (150 MHz,  $\text{CD}_2\text{Cl}_2$ )  $\delta$  14.5, 25.6, 30.7, 33.7, 60.9, 80.7, 101.7, 121.6, 128.6, 129.7, 132.9, 133.3, 136.3, 136.8, 144.0, 166.7, 179.5; FT-IR (neat)  $\nu$  2956, 2203, 1711, 1635, 1243, 1176, 946, 764  $\text{cm}^{-1}$ ; HRMS ( $\text{ESI}^+$ )  $m/z$  Calcd for  $\text{C}_{19}\text{H}_{21}\text{O}_3$  [ $\text{M}+\text{H}^+$ ] 297.1491 found 297.1483.

**(E)-Ethyl 3-(2-(3-cyclohexylpropioloyl)phenyl)acrylate**

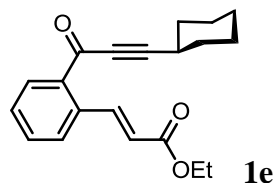

Silica gel purification (2.5 cm × 20 cm, eluted with ethyl acetate/n-hexane = 1:5,  $R_f$  (EtOAc/hexane (1:5)) = 0.50) gave a brown oil (54%):  $^1\text{H}$  NMR (400 MHz,  $\text{CDCl}_3$ )  $\delta$  1.32-1.38 (m, 6H), 1.56-1.65 (m, 3H), 1.74-1.77 (m, 2H), 1.90-1.92 (m, 2H), 2.67-2.71 (m, 1H), 4.27 (q,  $J$  = 7 Hz, 2H), 6.29 (d,  $J$  = 16 Hz, 1H), 7.48-7.54 (m, 1H), 7.56-7.57 (m, 2H), 8.17-8.19 (m, 1H), 8.40 (d,  $J$  = 16 Hz, 1H);  $^{13}\text{C}$  NMR (125 MHz,

$\text{CDCl}_3$ )  $\delta$  14.4, 24.8, 25.8, 29.5, 31.7, 60.7, 81.0, 101.0, 121.5, 128.4, 129.4, 132.6, 133.0, 136.2, 136.6, 143.9, 166.6, 179.3; FT-IR (neat)  $\nu$  2930, 2855, 2198, 1710, 1635, 1240, 1175, 915, 763  $\text{cm}^{-1}$ ; HRMS (ESI<sup>+</sup>)  $m/z$  Calcd for  $\text{C}_{20}\text{H}_{23}\text{O}_3$  [M+H<sup>+</sup>] 311.1647 found 311.1642.

### 3-Cyclopentyl-1-(2-vinylphenyl)prop-2-yn-1-one

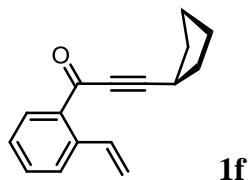

Silica gel purification (2.5 cm × 25 cm, eluted with ethyl acetate/n-hexane = 1:50,  $R_f$  (EtOAc/hexane (1:20)) = 0.33) gave a brown oil (41%): <sup>1</sup>H NMR (400 MHz,  $\text{CDCl}_3$ )  $\delta$  1.59-1.67 (m, 2H), 1.75-1.82 (m, 4H), 2.00-2.07 (m, 2H), 2.86-2.93 (m, 1H), 5.37 (dd,  $J_1$  = 1 Hz,  $J_2$  = 11 Hz, 1H), 5.66 (dd,  $J_1$  = 1 Hz,  $J_2$  = 17 Hz, 1H), 7.37-7.41 (m, 1H), 7.46-7.53 (m, 2H), 7.56-7.59 (m, 1H), 8.13 (dd,  $J_1$  = 1 Hz,  $J_2$  = 8 Hz, 1H); <sup>13</sup>C NMR (150 MHz,  $\text{CDCl}_3$ )  $\delta$  25.4, 30.5, 33.4, 81.0, 100.6, 116.9, 127.5, 127.7, 132.5, 132.9, 135.3, 136.1, 139.5, 180.1; FT-IR (neat)  $\nu$  2958, 2869, 2204, 1640, 1242, 768  $\text{cm}^{-1}$ ; HRMS (ESI<sup>+</sup>)  $m/z$  Calcd for  $\text{C}_{16}\text{H}_{17}\text{O}_1$  [M+H<sup>+</sup>] 225.1274 found 225.1274.

### 3-Cyclohexyl-1-(2-vinylphenyl)prop-2-yn-1-one

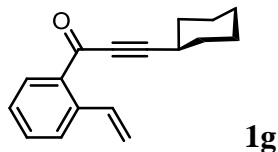

Silica gel purification (2.5 cm × 25 cm, eluted with ethyl acetate/n-hexane = 1:40,  $R_f$  (EtOAc/hexane (1:20)) = 0.50) gave a colorless oil (17%) (decomposed partly in  $\text{CDCl}_3$  overnight): <sup>1</sup>H NMR (700 MHz,  $\text{CDCl}_3$ )  $\delta$  1.34-1.43 (m, 3H), 1.59-1.61 (m, 3H), 1.75-1.78 (m, 2H), 1.91-1.92 (m, 2H), 2.67 (m, 1H), 5.37 (dd,  $J_1$  = 1 Hz,  $J_2$  = 11 Hz, 1H), 5.67 (dd,  $J_1$  = 1 Hz,  $J_2$  = 17 Hz, 1H), 7.38-7.40 (m, 1H), 7.49-7.53 (m, 2H), 7.57-7.58 (m, 1H), 8.15 (dd,  $J_1$  = 1 Hz,  $J_2$  = 8 Hz, 1H); <sup>13</sup>C NMR (176 MHz,  $\text{CDCl}_3$ )  $\delta$  24.9, 25.8, 29.6, 31.8, 81.3, 100.0, 116.9, 127.5, 127.7, 132.6, 132.9, 135.3, 136.1, 139.6, 180.1; FT-IR (neat)  $\nu$  2926, 2853, 2200, 1640, 1563, 1240, 915, 768  $\text{cm}^{-1}$ ; HRMS (ESI<sup>+</sup>)  $m/z$  Calcd for  $\text{C}_{17}\text{H}_{19}\text{O}_1$  [M+H<sup>+</sup>] 239.1430 found 239.1431.

### (E,Z)-3-Cyclohexyl-1-(2-styrylphenyl)prop-2-yn-1-one

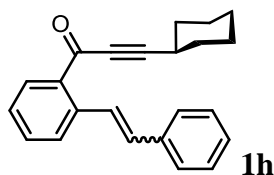

Silica gel purification (2.5 cm × 25 cm, eluted with ethyl acetate/n-hexane = 1:20,  $R_f$  (EtOAc/hexane (1:10)) = 0.50) gave a yellow oil (48%): <sup>1</sup>H NMR (400 MHz,  $\text{CDCl}_3$ )  $\delta$  1.24-1.29 (m, 3H), 1.43-1.53 (m, 3H), 1.63-1.69 (m, 2H), 1.77-1.81 (m, 2H),



2.53-2.61 (m, 1H), 6.29 (d,  $J = 12$  Hz, 0.3H), 6.92-7.00 (m, 1.7H), 7.05-7.06 (m, 1H), 7.17-7.23 (m, 1H), 7.28-7.32 (m, 2H), 7.43-7.49 (m, 2H), 7.62-7.64 (m, 1H), 7.92 (d,  $J = 16$  Hz, 1H), 8.07-8.10 (m, 0.7H), 8.13-8.16 (m, 0.3H);  $^{13}\text{C}$  NMR (101 MHz,  $\text{CDCl}_3$ )  $\delta$  24.8, 24.9, 25.8, 25.8, 29.5, 29.6, 31.7, 31.8, 81.5, 84.2, 100.0, 100.2, 127.0, 127.1, 127.2, 127.3, 127.7, 128.0, 128.1, 128.8, 129.4, 130.3, 130.7, 131.5, 131.9, 132.6, 132.7, 132.7, 132.9, 135.5, 136.0, 136.9, 137.5, 139.1, 139.3, 179.3, 180.2; FT-IR (neat)  $\nu$  2928, 2853, 2360, 2200, 1737, 1640, 1447, 1240, 916, 759, 692  $\text{cm}^{-1}$ ; HRMS ( $\text{ESI}^+$ )  $m/z$  Calcd for  $\text{C}_{23}\text{H}_{23}\text{O}_1$  [ $\text{M}+\text{H}^+$ ] 315.1749 found 315.1739.

### 3-Cyclohexyl-1-(2-(4-(trifluoromethyl)styryl)phenyl)prop-2-yn-1-one

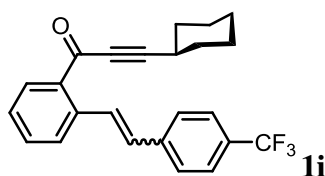

After the reaction, the mixture was filtered through a Celite pad which was washed with diethyl ether and concentrated *in vacuo* to give the crude product as a colorless oil (6%). This material was used in the next step without further purification.  $R_f$  (EtOAc/hexane (1:15)) = 0.50.

### 4, 4-Dimethyl-1-(2-vinylphenyl)pent-2-yn-1-one

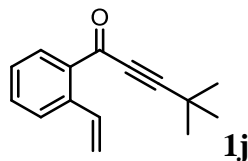

Silica gel purification (2.5 cm  $\times$  25 cm, eluted with ethyl acetate/n-hexane = 1:15,  $R_f$  (EtOAc/hexane (1:15)) = 0.41) gave a colorless oil (92%):  $^1\text{H}$  NMR (400 MHz,  $\text{CDCl}_3$ )  $\delta$  1.36 (s, 9H), 5.37 (d,  $J_1 = 1$  Hz,  $J_2 = 11$  Hz, 1H), 5.66 (dd,  $J_1 = 1$  Hz,  $J_2 = 17$  Hz, 1H), 7.37-7.41 (m, 1H), 7.46-7.53 (m, 2H), 7.56-7.59 (m, 1H), 8.10-8.12 (m, 1H);  $^{13}\text{C}$  NMR (101 MHz,  $\text{CDCl}_3$ )  $\delta$  28.2, 30.3, 80.0, 103.5, 116.9, 127.5, 127.7, 132.4, 132.8, 135.4, 136.1, 139.5, 180.0; FT-IR (neat)  $\nu$  2970, 2209, 1644, 1263, 1225, 1045, 884, 768, 668  $\text{cm}^{-1}$ ; HRMS ( $\text{ESI}^+$ )  $m/z$  Calcd for  $\text{C}_{15}\text{H}_{17}\text{O}_1$  [ $\text{M}+\text{H}^+$ ] 213.1274 found 213.1275.

### (E)-Ethyl 3-(2-(3-phenylpropioloyl)phenyl)acrylate

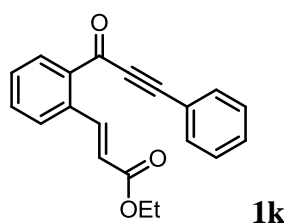

Silica gel (2.5 cm  $\times$  25 cm, eluted with ethyl acetate/n-hexane = 1:5,  $R_f$  (EtOAc/hexane (1:3)) = 0.54) to give brown oil (15%):  $^1\text{H}$  NMR (500 MHz,  $\text{CDCl}_3$ )  $\delta$  1.32 (t,  $J = 7$  Hz, 3H), 4.26 (q,  $J = 7$  Hz, 2H), 6.34 (d,  $J = 16$  Hz, 1H), 7.41-7.44 (m,



2H), 7.50 (tt,  $J_1 = 2$  Hz,  $J_2 = 7$  Hz, 1H), 7.54-7.57 (m, 1H), 7.59-7.62 (m, 2H), 7.66-7.68 (m, 2H), 8.30 (d,  $J = 8$  Hz, 1H), 8.47 (d,  $J = 16$  Hz, 1H);  $^{13}\text{C}$  NMR (125 MHz,  $\text{CDCl}_3$ )  $\delta$  14.4, 60.8, 88.3, 93.7, 120.1, 121.8, 128.6, 128.8, 129.5, 131.1, 132.6, 133.2, 133.4, 136.3, 136.5, 143.7, 166.6, 178.9; FT-IR (neat)  $\nu$  2194, 1710, 1633, 1594, 1267, 1176, 994, 758  $\text{cm}^{-1}$ ; HRMS ( $\text{ESI}^+$ )  $m/z$  Calcd for  $\text{C}_{20}\text{H}_{17}\text{O}_3$  [ $\text{M}+\text{H}^+$ ] 305.1172 found 305.1175.

**(E)-Ethyl 3-(2-(3-cyclohexenylpropioloyl)phenyl)acrylate**

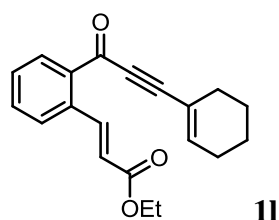

Silica gel purification (2.5 cm  $\times$  25 cm, eluted with ethyl acetate/n-hexane = 1:5,  $R_f$  (EtOAc/hexane (1:5)) = 0.36) gave a yellow oil (39%) (decomposed in  $\text{CDCl}_3$  overnight):  $^1\text{H}$  NMR (400 MHz,  $\text{CDCl}_3$ )  $\delta$  1.34 (t,  $J = 7$  Hz, 3H), 1.61-1.72 (m, 4H), 2.18-2.22 (m, 2H), 2.22-2.27 (m, 2H), 4.27 (q,  $J = 7$  Hz, 2H), 6.30 (d,  $J = 16$  Hz, 1H), 6.54-6.57 (m, 1H), 7.47-7.51 (m, 1H), 7.54-7.59 (m, 2H), 8.15-8.17 (m, 1H), 8.41 (d,  $J = 16$  Hz, 1H);  $^{13}\text{C}$  NMR (125 MHz,  $\text{CDCl}_3$ )  $\delta$  14.5, 21.2, 22.1, 26.4, 28.4, 60.7, 86.8, 96.3, 119.2, 121.5, 128.4, 129.4, 132.4, 133.0, 136.2, 136.7, 143.1, 143.9, 166.6, 179.2; HRMS ( $\text{ESI}^+$ )  $m/z$  Calcd for  $\text{C}_{20}\text{H}_{20}\text{O}_3\text{Na}$  [ $\text{M}+\text{Na}^+$ ] 331.1305 found 331.1307.

**(E)-Ethyl 3-(2-(3-cyclopropylpropioloyl)phenyl)acrylate**

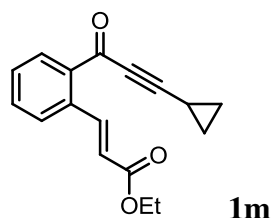

Silica gel purification (2.5 cm  $\times$  25 cm, eluted with ethyl acetate/n-hexane = 1:5,  $R_f$  (EtOAc/hexane (1:5)) = 0.25) gave a brown oil (44%):  $^1\text{H}$  NMR (400 MHz,  $\text{CDCl}_3$ )  $\delta$  1.00-1.06 (m, 4H), 1.35 (t,  $J = 7$  Hz, 3H), 1.49-1.56 (m, 1H), 4.28 (q,  $J = 7$  Hz, 2H), 6.29 (d,  $J = 16$  Hz, 1H), 7.47-7.51 (m, 1H), 7.53-7.58 (m, 2H), 8.11-8.14 (m, 1H), 8.39 (d,  $J = 16$  Hz, 1H);  $^{13}\text{C}$  NMR (125 MHz,  $\text{CD}_2\text{Cl}_2$ )  $\delta$  10.0, 14.3, 22.9, 31.8, 60.7, 76.9, 101.7, 121.4, 128.4, 129.5, 132.6, 133.1, 136.0, 143.8, 166.6, 178.8; FT-IR (neat):  $\nu$  2359, 2206, 1710, 1632, 1566, 1477, 1314, 1251, 1177, 914, 762  $\text{cm}^{-1}$ ; HRMS ( $\text{ESI}^+$ )  $m/z$  Calcd for  $\text{C}_{17}\text{H}_{17}\text{O}_3$  [ $\text{M}+\text{H}^+$ ] 269.1172 found 269.1174.

**2.3 General procedure for substituted styrene alkynone cyclisation and product characterisation data**

### Procedure A

To AcOH (3 mL) containing Pd(OAc)<sub>2</sub> (10 mol %) and LiCl (4 equiv.), enyne (0.15 mmol) was added. The reaction was heated at 60 °C in air until the substituted styrene alkynone disappeared, as monitored by GC-MS. On cooling, the solvent was removed *in vacuo* and the residue was purified by flash chromatography to give the product.

### Procedure B

To AcOH (3 mL) containing Pd(OAc)<sub>2</sub> (10 mol %) and LiCl (4 equiv.), enyne (0.15 mmol) was added. The reaction was heated at 60 °C under a nitrogen atmosphere. The mixture was stirred until the substituted styrene alkynone disappeared, as monitored by GC-MS. On cooling, the solvent was removed *in vacuo* and the residue was purified by flash chromatography to give the product.

### Procedure C

To CH<sub>3</sub>CN (3 mL) containing PdCl<sub>2</sub> (10 mol %), substrate (0.15 mmol) was added. The reaction was heated at 80 °C under a nitrogen atmosphere. The mixture was stirred until the substituted styrene alkynone disappeared, as monitored by GC-MS. After cooling, the solvent was removed *in vacuo* and the residue was purified by flash chromatography to give the product.

### 1-Butylindeno[2,1-c]pyran-3,9-dione

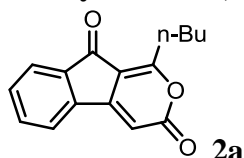

Procedure A, silica gel purification (2.5 cm × 25 cm, eluted with ethyl acetate/n-hexane = 1:5, R<sub>f</sub> (EtOAc/hexane (1:5)) = 0.20) gave a yellow, crystalline product (31%): m.p. 100-101 °C; <sup>1</sup>H NMR (400 MHz, CDCl<sub>3</sub>) δ 0.96 (t, *J* = 7 Hz, 3H), 1.41-1.50 (m, 2H), 1.73-1.81 (m, 2H), 3.09 (t, *J* = 8 Hz, 2H), 6.47 (s, 1H), 7.65 (dt, *J*<sub>1</sub> = 1 Hz, *J*<sub>2</sub> = 8 Hz, 1H), 7.72 (dt, *J*<sub>1</sub> = 1 Hz, *J*<sub>2</sub> = 7 Hz, 1H), 7.82 (dt, *J*<sub>1</sub> = 1 Hz, *J*<sub>2</sub> = 8 Hz, 1H), 7.89 (dt, *J*<sub>1</sub> = 1 Hz, *J*<sub>2</sub> = 8 Hz, 1H); <sup>13</sup>C NMR (101 MHz, CDCl<sub>3</sub>) δ 13.8, 22.5, 29.2, 30.4, 102.6, 112.5, 123.5, 124.6, 133.1, 134.9, 139.0, 139.0, 153.5, 161.5, 170.5, 187.7; FT-IR (neat) ν 2971, 2928, 1732, 1699, 1633, 1578, 1462, 1363, 1140, 906, 874 cm<sup>-1</sup>; HRMS (ESI<sup>+</sup>) *m/z* Calcd for C<sub>16</sub>H<sub>15</sub>O<sub>3</sub> [M+H<sup>+</sup>] 255.1021 found 255.1017.

### 2-(Cyclohexylidenemethyl)-3-(4-methylbenzyl)-1H-inden-1-one

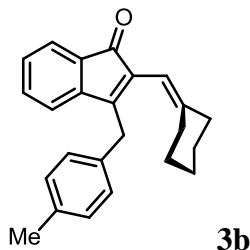

Procedure C, silica gel purification (2.5 cm × 25 cm, eluted with ethyl acetate/n-hexane = 1:80,  $R_f$  (EtOAc/hexane (1:10)) = 0.53) gave a brown-red oil (53%):  $^1\text{H}$  NMR (600 MHz,  $\text{CDCl}_3$ )  $\delta$  1.56-1.58 (m, 4H), 1.63-1.64 (m, 2H), 2.15 (t,  $J$  = 5 Hz, 2H), 2.29 (dt,  $J_1$  = 1 Hz,  $J_2$  = 6 Hz, 2H), 2.31 (s, 3H), 3.85 (s, 2H), 5.74 (s, 1H), 6.84 (d,  $J$  = 7 Hz, 1H), 7.09-7.12 (m, 2H), 7.13-7.16 (m, 2H), 7.18-7.20 (m, 1H), 7.20 (dt,  $J_1$  = 1 Hz,  $J_2$  = 8 Hz, 1H), 7.38-7.39 (m, 1H);  $^{13}\text{C}$  NMR (150 MHz,  $\text{CDCl}_3$ ):  $\delta$  21.2, 26.6, 28.0, 28.7, 31.9, 32.9, 37.4, 110.5, 120.4, 122.1, 128.2, 128.6, 129.5, 131.3, 133.4, 133.4, 134.0, 136.4, 145.6, 149.7, 156.0, 197.5; FT-IR (neat)  $\nu$  2925, 2852, 1709, 1602, 1446, 1161, 810, 744  $\text{cm}^{-1}$ ; HRMS ( $\text{ESI}^+$ )  $m/z$  Calcd for  $\text{C}_{24}\text{H}_{25}\text{O}_1$  [ $\text{M}+\text{H}^+$ ] 329.1905 found 329.1886.

### 1-*tert*-Butylindeno[2,1-*c*]pyran-3,9-dione

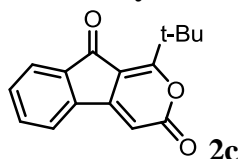

Procedure A, silica gel purification (2.5 cm × 25 cm, eluted with ethyl acetate/n-hexane = 1:10,  $R_f$  (EtOAc/hexane (1:5)) = 0.41) gave a white crystalline solid (24 h, 25%, 2 weeks, 67%): m.p. 224-225 °C;  $^1\text{H}$  NMR (700 MHz,  $\text{CDCl}_3$ )  $\delta$  1.52 (s, 9H), 6.50 (s, 1H), 7.64 (t,  $J$  = 8 Hz, 1H), 7.70 (t,  $J$  = 7 Hz, 1H), 7.79 (d,  $J$  = 8 Hz, 1H), 7.87 (d,  $J$  = 8 Hz, 1H);  $^{13}\text{C}$  NMR (176 MHz,  $\text{CDCl}_3$ )  $\delta$  27.3, 38.8, 102.1, 111.9, 122.9, 124.6, 133.0, 134.8, 138.6, 139.0, 155.5, 161.0, 178.4, 186.9; FT-IR (neat)  $\nu$  2971, 2928, 1732, 1699, 1633, 1578, 1462, 1276, 1254, 1182, 1049, 906, 874  $\text{cm}^{-1}$ ; HRMS ( $\text{ESI}^+$ )  $m/z$  Calcd for  $\text{C}_{16}\text{H}_{15}\text{O}_3$  [ $\text{M}+\text{H}^+$ ] 255.1021 found 255.1017.

### Ethyl 2-(2-(cyclopentylidenemethyl)-1-oxo-1H-inden-3-yl)acetate

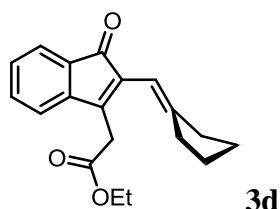

Procedure C, silica gel purification (2.5 cm × 25 cm, eluted with ethyl acetate/n-hexane = 1:15,  $R_f$  (EtOAc/hexane (1:5)) = 0.41) gave a red oil (69%):  $^1\text{H}$  NMR (400 MHz,  $\text{CDCl}_3$ )  $\delta$  1.25 (t,  $J$  = 7 Hz, 3H), 1.64-1.71 (m, 4H), 2.30-2.31 (m, 2H), 2.46-2.47 (m, 2H), 3.55 (s, 2H), 4.18 (q,  $J$  = 7 Hz, 2H), 5.95 (t,  $J$  = 2 Hz, 1H), 7.06 (d,  $J$  = 7 Hz, 1H), 7.16-7.20 (m, 1H), 7.31-7.35 (m, 1H), 7.39-7.41 (m, 1H);  $^{13}\text{C}$  NMR (125 MHz,  $\text{CDCl}_3$ )  $\delta$  14.3, 25.8, 26.9, 32.1, 33.3, 35.0, 61.50, 109.3, 119.7, 122.4, 128.4, 130.7, 133.7, 135.0, 145.5, 148.1, 154.3, 169.3, 196.7; FT-IR (neat)  $\nu$  2957, 1732, 1710, 1603, 1456, 1162, 1034, 754  $\text{cm}^{-1}$ ; HRMS ( $\text{ESI}^+$ )  $m/z$  Calcd for  $\text{C}_{19}\text{H}_{21}\text{O}_3$  [ $\text{M}+\text{H}^+$ ] 297.1485 found 297.1487.

### 1-Cyclopentylindeno[2,1-c]pyran-3,9-dione

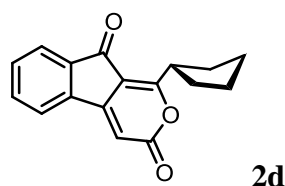

Procedure A, silica gel purification (2.5 cm × 25 cm, eluted with ethyl acetate/n-hexane = 1:5,  $R_f$  (EtOAc/hexane (1:5)) = 0.25) gave a white, crystalline solid (34%): m.p. 186-187 °C;  $^1\text{H}$  NMR (700 MHz,  $\text{CDCl}_3$ )  $\delta$  1.74-1.75 (m, 2H), 1.88-1.95 (m, 4H), 2.03-2.05 (m, 2H), 4.14-4.19 (m, 1H), 6.44 (s, 1H), 7.64 (dt,  $J_1 = 1$  Hz,  $J_2 = 7$  Hz, 1H), 7.71 (dt,  $J_1 = 1$  Hz,  $J_2 = 7$  Hz, 1H), 7.81 (d,  $J = 8$  Hz, 1H), 7.88 (d,  $J = 7$  Hz, 1H);  $^{13}\text{C}$  NMR (176 MHz,  $\text{CDCl}_3$ )  $\delta$  26.7, 31.4, 39.8, 102.5, 111.8, 123.5, 124.6, 133.1, 134.9, 139.0, 139.2, 153.7, 161.7, 173.5, 188.0; FT-IR (neat)  $\nu$  2954, 2866, 1730, 1700, 1650, 1616  $\text{cm}^{-1}$ ; HRMS (ASAP<sup>+</sup>)  $m/z$  Calcd for  $\text{C}_{17}\text{H}_{15}\text{O}_3$  [ $\text{M}+\text{H}^+$ ] 267.1021 found 267.1011.

### Ethyl 2-(2-(cyclohexylidenemethyl)-1-oxo-1H-inden-3-yl)acetate

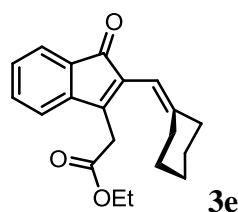

Procedure C, silica gel purification (2.5 cm × 25 cm, eluted with ethyl acetate/n-hexane = 1:15,  $R_f$  (EtOAc/hexane (1:5)) = 0.46) gave a red, crystalline solid (76%): m.p. 82-84 °C;  $^1\text{H}$  NMR (400 MHz,  $\text{CDCl}_3$ )  $\delta$  1.25 (t,  $J = 7$  Hz, 3H), 1.54-1.56 (m, 4H), 1.60-1.64 (m, 2H), 2.08-2.11 (m, 2H), 2.27-2.30 (m, 2H), 3.53 (s, 2H), 4.19 (q,  $J = 7$  Hz, 2H), 5.67 (s, 1H), 7.05-7.07 (m, 1H), 7.17-7.20 (m, 1H), 7.32-7.36 (m, 1H), 7.40-7.42 (m, 1H);  $^{13}\text{C}$  NMR (101 MHz,  $\text{CDCl}_3$ )  $\delta$  14.3, 26.5, 28.0, 28.6, 31.6, 33.4, 37.4, 61.5, 110.2, 119.8, 122.4, 128.5, 130.7, 133.7, 134.6, 145.4, 149.1, 150.3, 169.3, 197.2; FT-IR (neat):  $\nu$  2931, 2852, 1723, 1705, 1605, 1458, 1249, 1026, 774, 736  $\text{cm}^{-1}$ ; HRMS (ASAP)  $m/z$  Calcd for  $\text{C}_{20}\text{H}_{22}\text{O}_3$  [ $\text{M}$ ] 310.1569 found 310.1546.

### 2-(Cyclopentylidenemethyl)-3-methyl-1H-inden-1-one

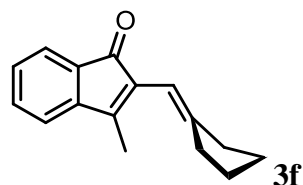

Procedure C, silica gel purification (2.5 cm × 25 cm, eluted with ethyl acetate/n-hexane = 1:15,  $R_f$  (EtOAc/hexane (1:20)) = 0.34) gave a red oil (94%):  $^1\text{H}$  NMR (500 MHz,  $\text{CDCl}_3$ )  $\delta$  1.68-1.71 (m, 4H), 2.10 (s, 3H), 2.27-2.28 (m, 2H), 2.48-2.49 (m, 2H), 5.96 (s, 1H), 7.04 (d,  $J = 7$  Hz, 1H), 7.17 (t,  $J = 7$  Hz, 1H), 7.33 (dt,  $J_1 = 1$  Hz,  $J_2 = 8$  Hz, 1H), 7.37 (d,  $J = 7$  Hz, 1H);  $^{13}\text{C}$  NMR (125 MHz,  $\text{CDCl}_3$ )  $\delta$  13.0,

25.9, 26.9, 32.3, 34.8, 109.9, 118.9, 121.8, 128.4, 131.0, 133.1, 133.5, 146.7, 152.4, 153.1, 197.4; FT-IR (neat)  $\nu$  2924, 1706, 1456, 1383, 962, 754  $\text{cm}^{-1}$ ; HRMS ( $\text{ESI}^+$ )  $m/z$  Calcd for  $\text{C}_{16}\text{H}_{17}\text{O}_1$  [ $\text{M}+\text{H}^+$ ] 225.1274 found 225.1274.

### 2-(Cyclohexylidenemethyl)-3-methyl-1H-inden-1-one

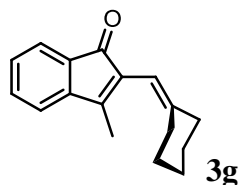

Procedure C, silica gel purification (2.5 cm  $\times$  25 cm, eluted with ethyl acetate/n-hexane = 1:20,  $R_f$  (EtOAc/hexane (1:15)) = 0.53) gave a red oil (88%):  $^1\text{H}$  NMR (400 MHz,  $\text{CDCl}_3$ )  $\delta$  1.56-1.64 (m, 6H), 2.09-2.10 (m, 5H), 2.29 (t,  $J$  = 6 Hz, 2H), 5.70 (s, 1H), 7.05 (d,  $J$  = 7 Hz, 1H), 7.18 (t,  $J$  = 8 Hz, 1H), 7.34 (dt,  $J_1$  = 1 Hz,  $J_2$  = 7 Hz, 1H), 7.39 (m, 1H);  $^{13}\text{C}$  NMR (101 MHz,  $\text{CDCl}_3$ )  $\delta$  13.0, 26.6, 27.8, 28.6, 31.7, 37.4, 110.9, 119.0, 121.9, 128.4, 131.0, 132.6, 133.5, 146.6, 148.6, 154.0, 197.8; FT-IR (neat)  $\nu$  2926, 2852, 1706, 1610, 1456, 1382, 1082, 754  $\text{cm}^{-1}$ ; HRMS ( $\text{ESI}^+$ )  $m/z$  Calcd for  $\text{C}_{17}\text{H}_{19}\text{O}_1$  [ $\text{M}+\text{H}^+$ ] 239.1430 found 239.1431.

### 3-Benzyl-2-(cyclohexylidenemethyl)-1H-inden-1-one

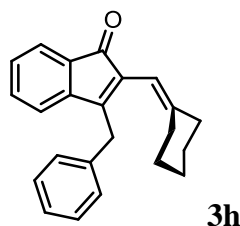

Procedure C, silica gel purification (2.5 cm  $\times$  25 cm, eluted with ethyl acetate/n-hexane = 1:80,  $R_f$  (EtOAc/hexane (1:10)) = 0.57) gave a red oil (78%):  $^1\text{H}$  NMR (400 MHz,  $\text{CDCl}_3$ )  $\delta$  1.55-1.56 (m, 3H), 1.60-1.63 (m, 3H), 2.14 (t,  $J$  = 6 Hz, 2H), 2.28 (t,  $J$  = 6 Hz, 2H), 3.89 (s, 2H), 5.74 (s, 1H), 6.82 (d,  $J$  = 7 Hz, 1H), 7.12 (dt,  $J_1$  = 1 Hz,  $J_2$  = 8 Hz, 1H), 7.17-7.30 (m, 6H), 7.38-7.40 (m, 1H);  $^{13}\text{C}$  NMR (150 MHz,  $\text{CDCl}_3$ )  $\delta$  26.5, 28.0, 28.7, 31.9, 33.3, 37.4, 110.4, 120.4, 122.2, 126.8, 128.2, 128.7, 128.9, 131.3, 133.4, 133.5, 137.2, 145.5, 149.8, 155.7, 197.5; FT-IR (neat)  $\nu$  2927, 2852, 1719, 1602, 1453, 760, 724, 697  $\text{cm}^{-1}$ ; HRMS ( $\text{ESI}^+$ )  $m/z$  Calcd for  $\text{C}_{23}\text{H}_{23}\text{O}_1$  [ $\text{M}+\text{H}^+$ ] 315.1749 found 315.1724.

### 2-(Cyclohexylidenemethyl)-3-(4-(trifluoromethyl)benzyl)-1H-inden-1-one

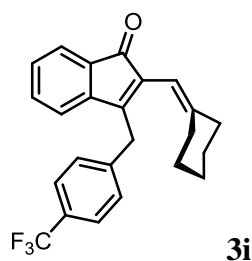

Procedure C, silica gel purification (2.5 cm × 25 cm, eluted with ethyl acetate/n-hexane = 1:30,  $R_f$  (EtOAc/hexane (1:15)) = 0.47) gave a red solid (98%): m.p. 123-125 °C;  $^1\text{H}$  NMR (400 MHz,  $\text{CDCl}_3$ )  $\delta$  1.53-1.57 (m, 4H), 1.60-1.64 (m, 2H), 2.13 (t,  $J$  = 6 Hz, 2H), 2.28 (t,  $J$  = 6 Hz, 2H), 3.9 (s, 2H), 5.7 (s, 1H), 6.79 (d,  $J$  = 7 Hz, 1H), 7.15 (dt,  $J_1$  = 1 Hz,  $J_2$  = 8 Hz, 1H), 7.21-7.25 (m, 1H), 7.38 (d,  $J$  = 8 Hz, 2H), 7.41-7.43 (m, 1H), 7.55 (d,  $J$  = 8 Hz, 2H);  $^{13}\text{C}$  NMR (150 MHz,  $\text{CDCl}_3$ )  $\delta$  26.5, 28.0, 28.7, 32.0, 33.0, 37.4, 110.2, 120.1, 122.5, 124.3 (q,  $J_{\text{CF}}$  = 270 Hz,  $\text{CF}_3$ ), 125.8 (q,  $J_{\text{CF}}$  = 4 Hz, arene C), 128.5, 129.0, 129.3 (q,  $J_{\text{CF}}$  = 32 Hz, arene C), 131.1, 133.6, 134.1, 141.4, 145.1, 150.4, 154.3, 197.1; FT-IR (neat)  $\nu$  2926, 2854, 1709, 1602, 1448, 1323, 1124, 1067, 1020, 848, 752  $\text{cm}^{-1}$ ; HRMS ( $\text{ESI}^+$ )  $m/z$  Calcd for  $\text{C}_{24}\text{H}_{22}\text{O}_1\text{F}_3$  [ $\text{M}+\text{H}^+$ ] 383.1617 found 383.1617.

### 3-Methyl-2-(3-methylbut-2-en-2-yl)-1H-inden-1-one

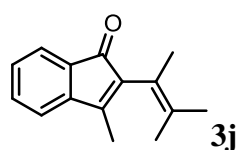

Procedure C, silica gel purification (2.5 cm × 25 cm, eluted with ethyl acetate/n-hexane = 1:20,  $R_f$  (EtOAc/hexane (1:10)) = 0.50) gave a brown oil (98%):  $^1\text{H}$  NMR (400 MHz,  $\text{CDCl}_3$ )  $\delta$  1.58 (s, 3H), 1.82 (s, 6H), 2.03 (s, 3H), 7.06 (d,  $J$  = 7 Hz, 1H), 7.19 (t,  $J$  = 7 Hz, 1H), 7.35 (t,  $J$  = 8 Hz, 1H), 7.39 (d,  $J$  = 7 Hz, 1H);  $^{13}\text{C}$  NMR (101 MHz,  $\text{CDCl}_3$ ):  $\delta$  12.5, 18.6, 20.3, 22.6, 119.0, 120.1, 121.8, 128.4, 131.0, 132.3, 133.4, 138.3, 146.2, 154.1, 197.7; FT-IR (neat)  $\nu$  2914, 1702, 1608, 1455, 1380, 1324, 1081, 755, 719  $\text{cm}^{-1}$ ; HRMS ( $\text{ESI}^+$ )  $m/z$  Calcd for  $\text{C}_{15}\text{H}_{17}\text{O}_1$  [ $\text{M}+\text{H}^+$ ] 213.1279 found 213.1262.

## 2.4 Procedure for Luche reduction of cyclisation product and characterisation data

### 3-Methyl-2-(3-methylbut-2-en-2-yl)-1H-inden-1-ol

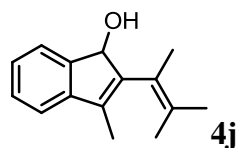

To MeOH (10 mL) containing cerium(III) chloride heptahydrate (1.1 equiv.) and substrate (0.45 mmol) was added sodium borohydride (1.1 equiv.) at 0 °C. The reaction was stirred at room temperature under an  $\text{N}_2$  atmosphere for 0.5 h. Then, the solvent was removed *in vacuo*. The residue was purified by flash chromatography (2.5 cm × 8 cm, eluted with ethyl acetate/n-hexane = 1:5,  $R_f$  (EtOAc/hexane (1:2)) = 0.62) to give a brown oil (90%):  $^1\text{H}$  NMR (400 MHz,  $\text{CDCl}_3$ )  $\delta$  1.65 (d,  $J$  = 1 Hz, 3H), 1.86 (s, 3H), 1.89 (s, 3H), 1.89 (s, 3H), 5.21 (s, 1H), 7.17-7.22 (m, 2H), 7.32 (dt,  $J_1$  = 1 Hz,  $J_2$  = 7 Hz, 1H), 7.50 (d,  $J$  = 8 Hz, 1H);  $^{13}\text{C}$  NMR (151 MHz,  $\text{CDCl}_3$ )  $\delta$  11.5, 18.8, 20.5, 22.4, 77.2, 118.9, 123.1, 123.2, 125.6, 128.5, 131.1, 133.9, 144.7, 144.7, 147.5; FT-IR (neat)  $\nu$  1725, 1606, 1436, 1372, 1177, 1088, 1005, 752, 731, 688, 630  $\text{cm}^{-1}$ .

## 2.5 References

1. Shahzad, S. A.; Vivant, C.; Wirth, T. *Biochemistry*, **2009**, *48*, 6288.
- 2 Wang, M.; Zhou, H.; Wirz, M.; Tang, Y.; Boddy, C. N. *Org. Lett.*, **2010**, *12*, 1364.



3. <sup>1</sup>H and <sup>13</sup>C-NMR spectra for new compounds

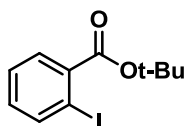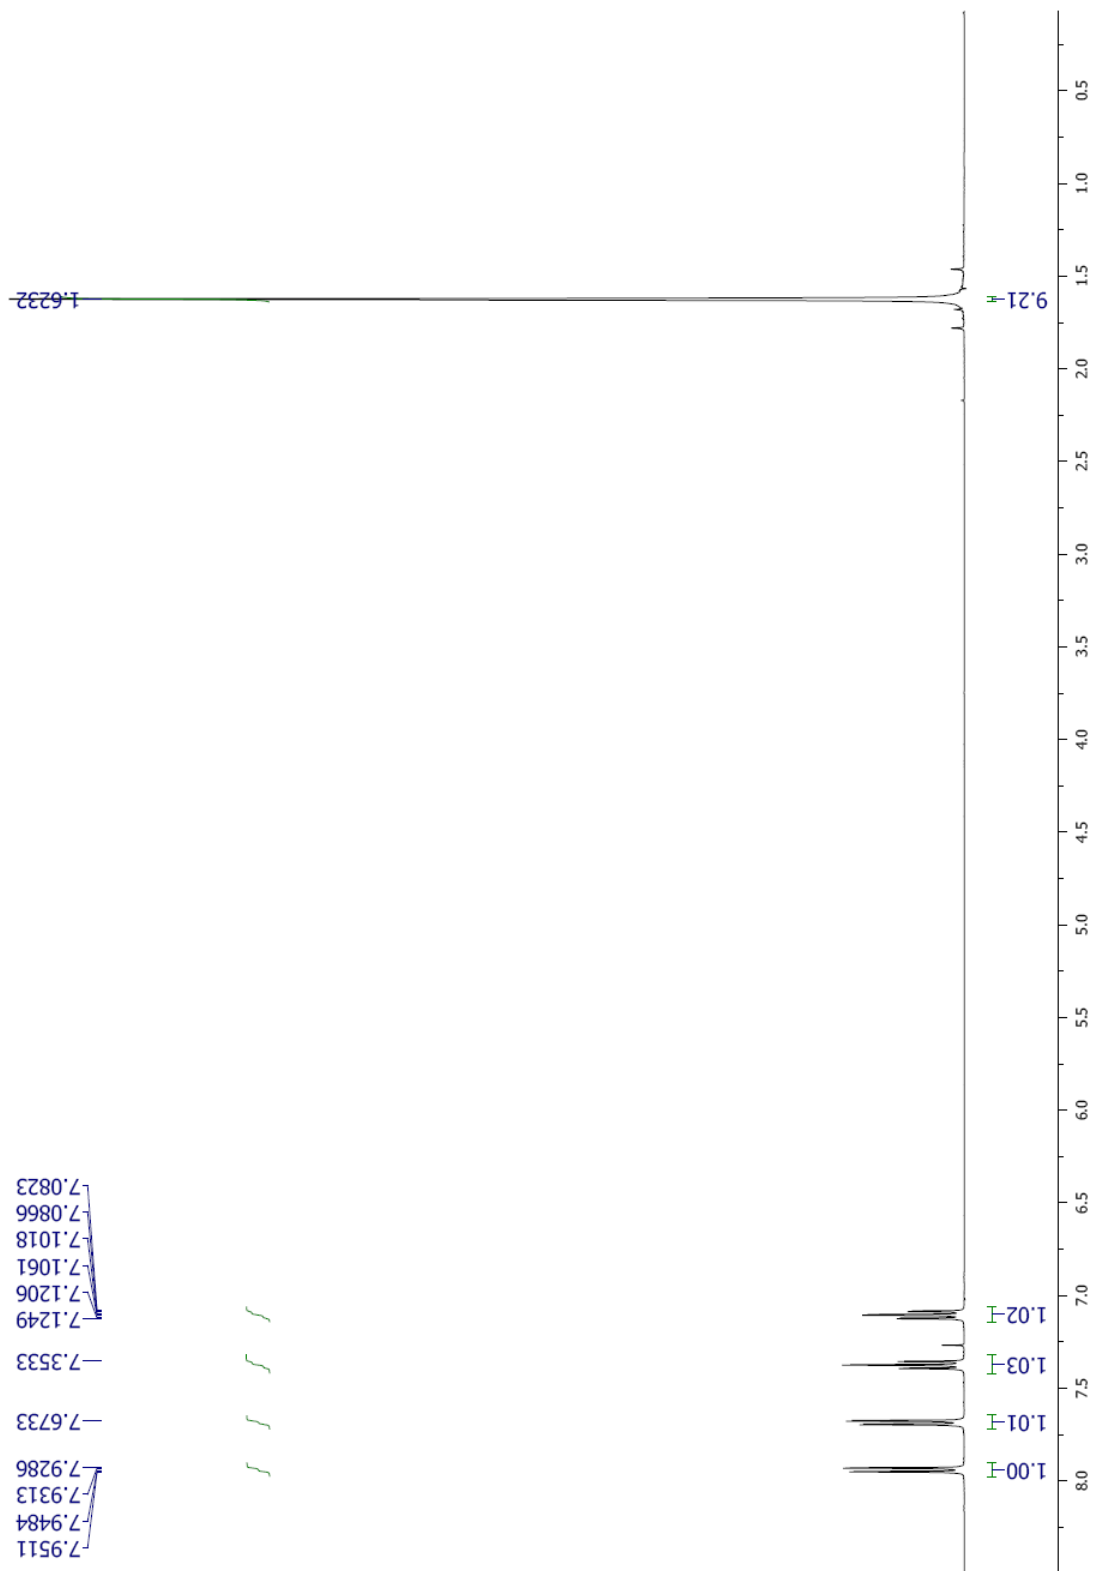

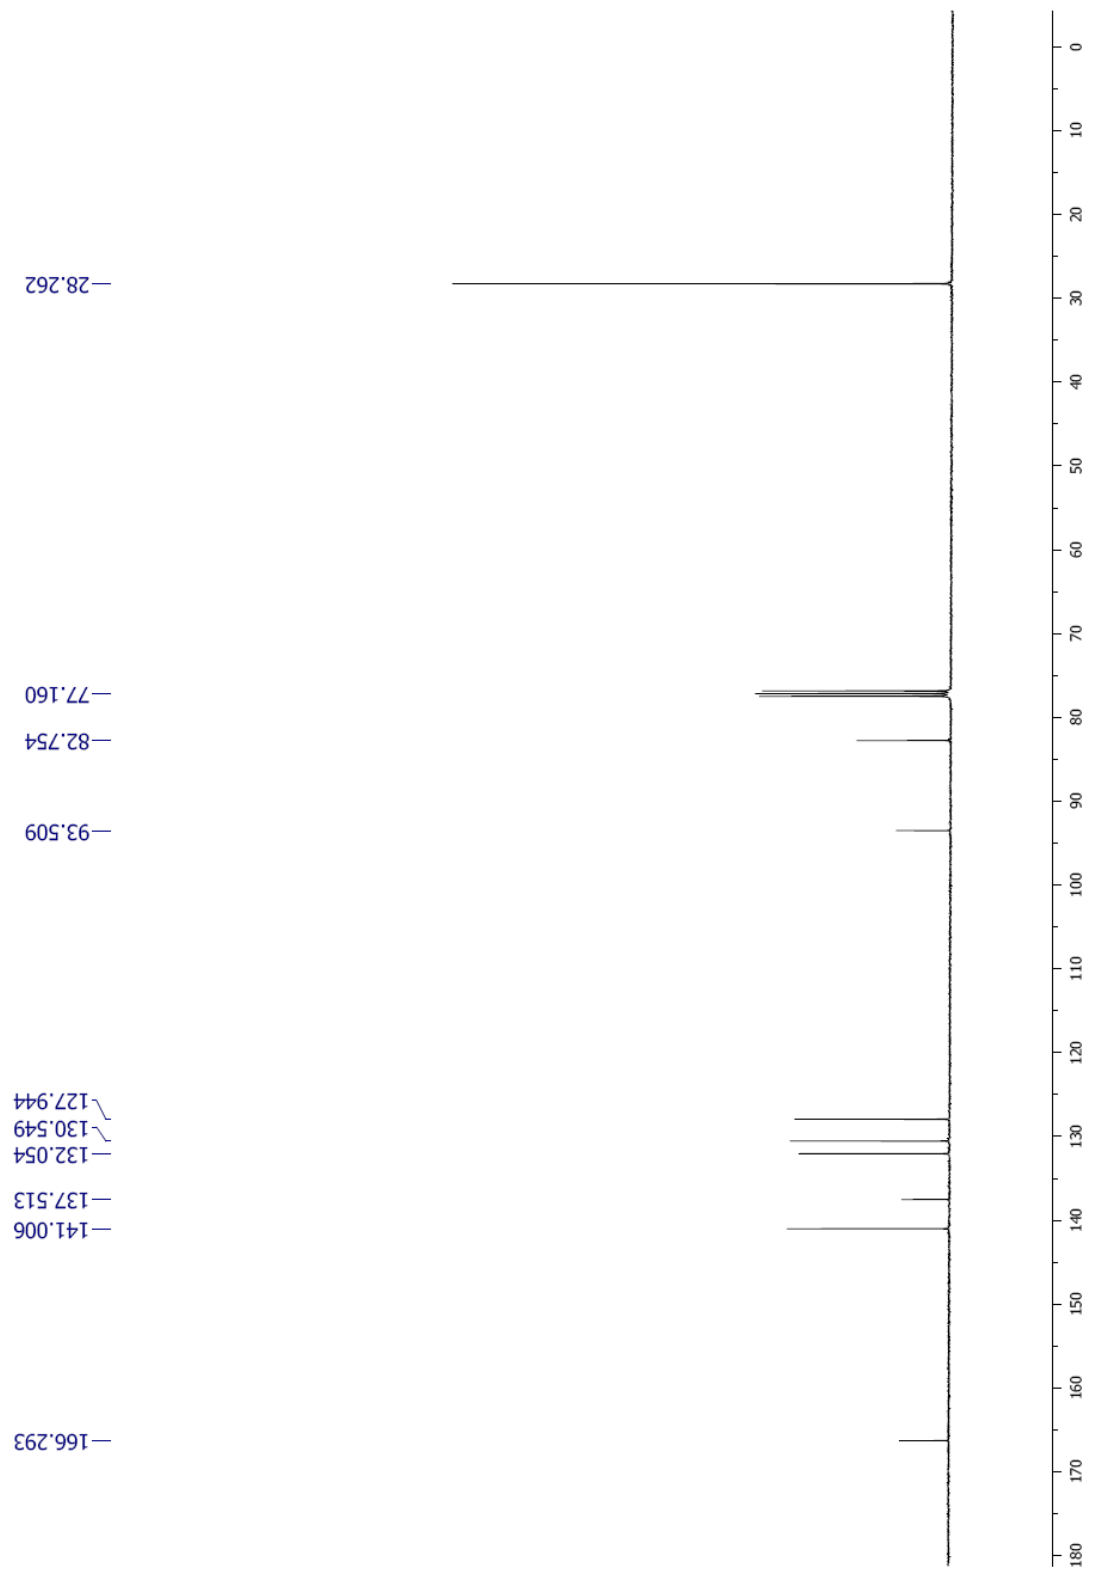

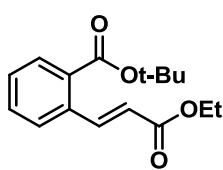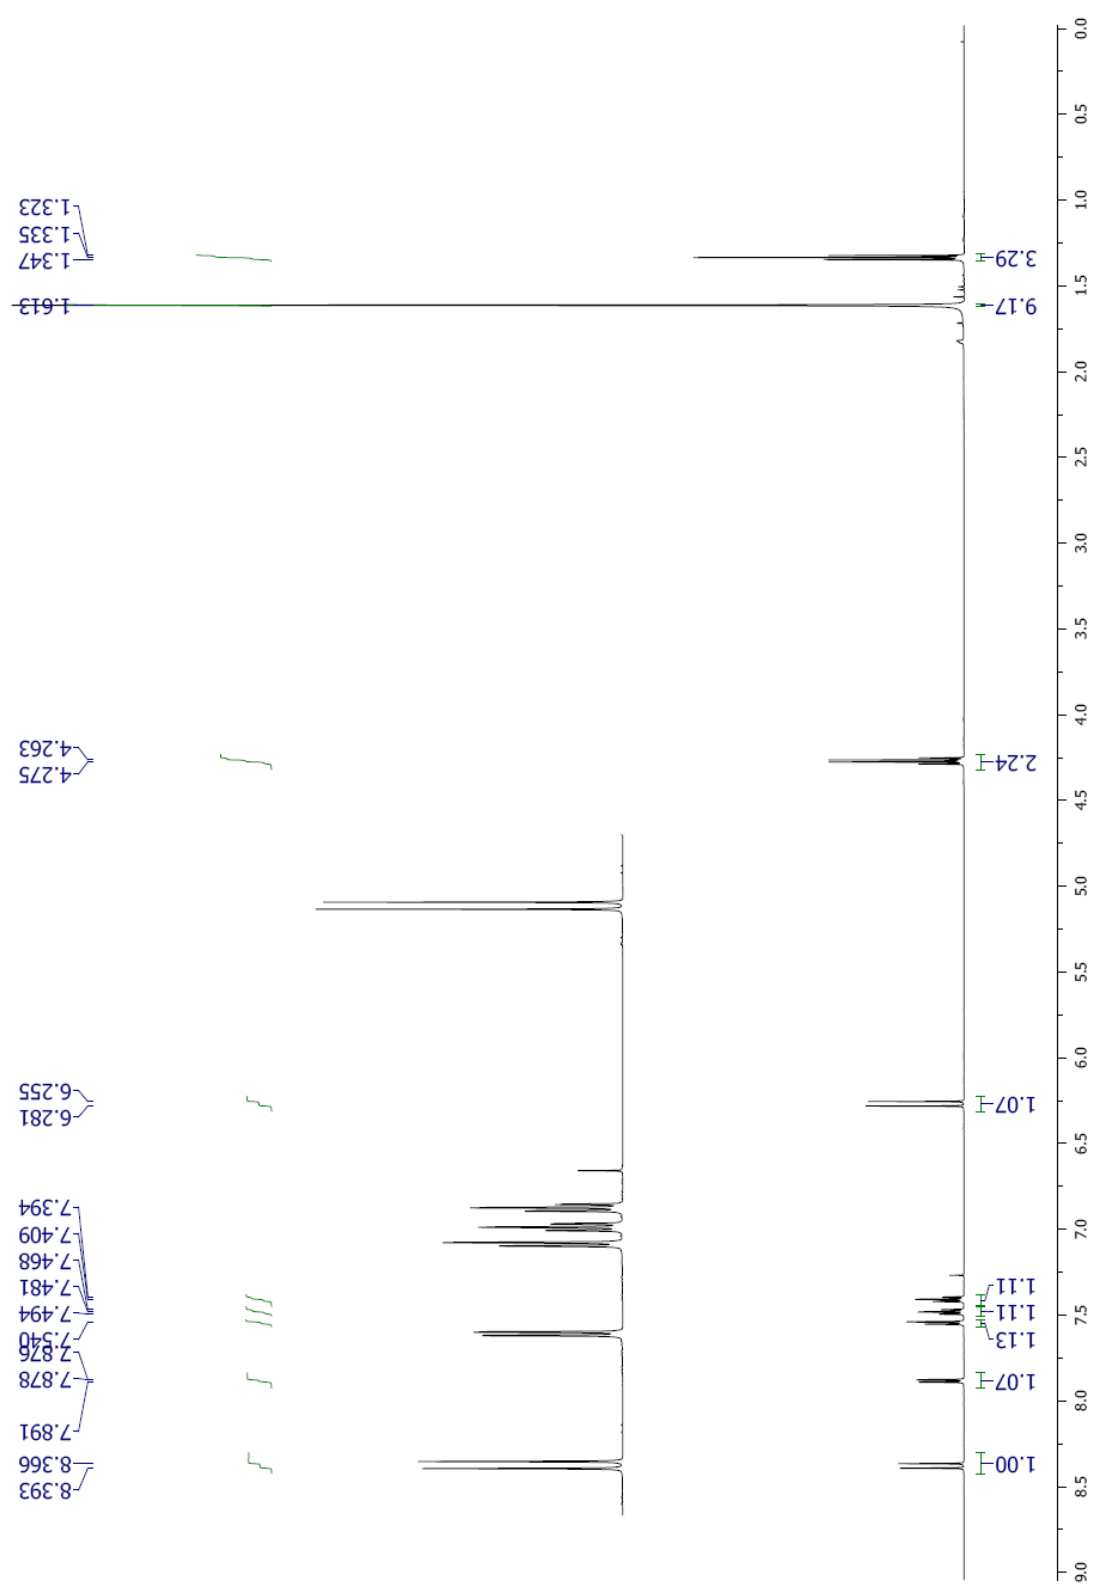

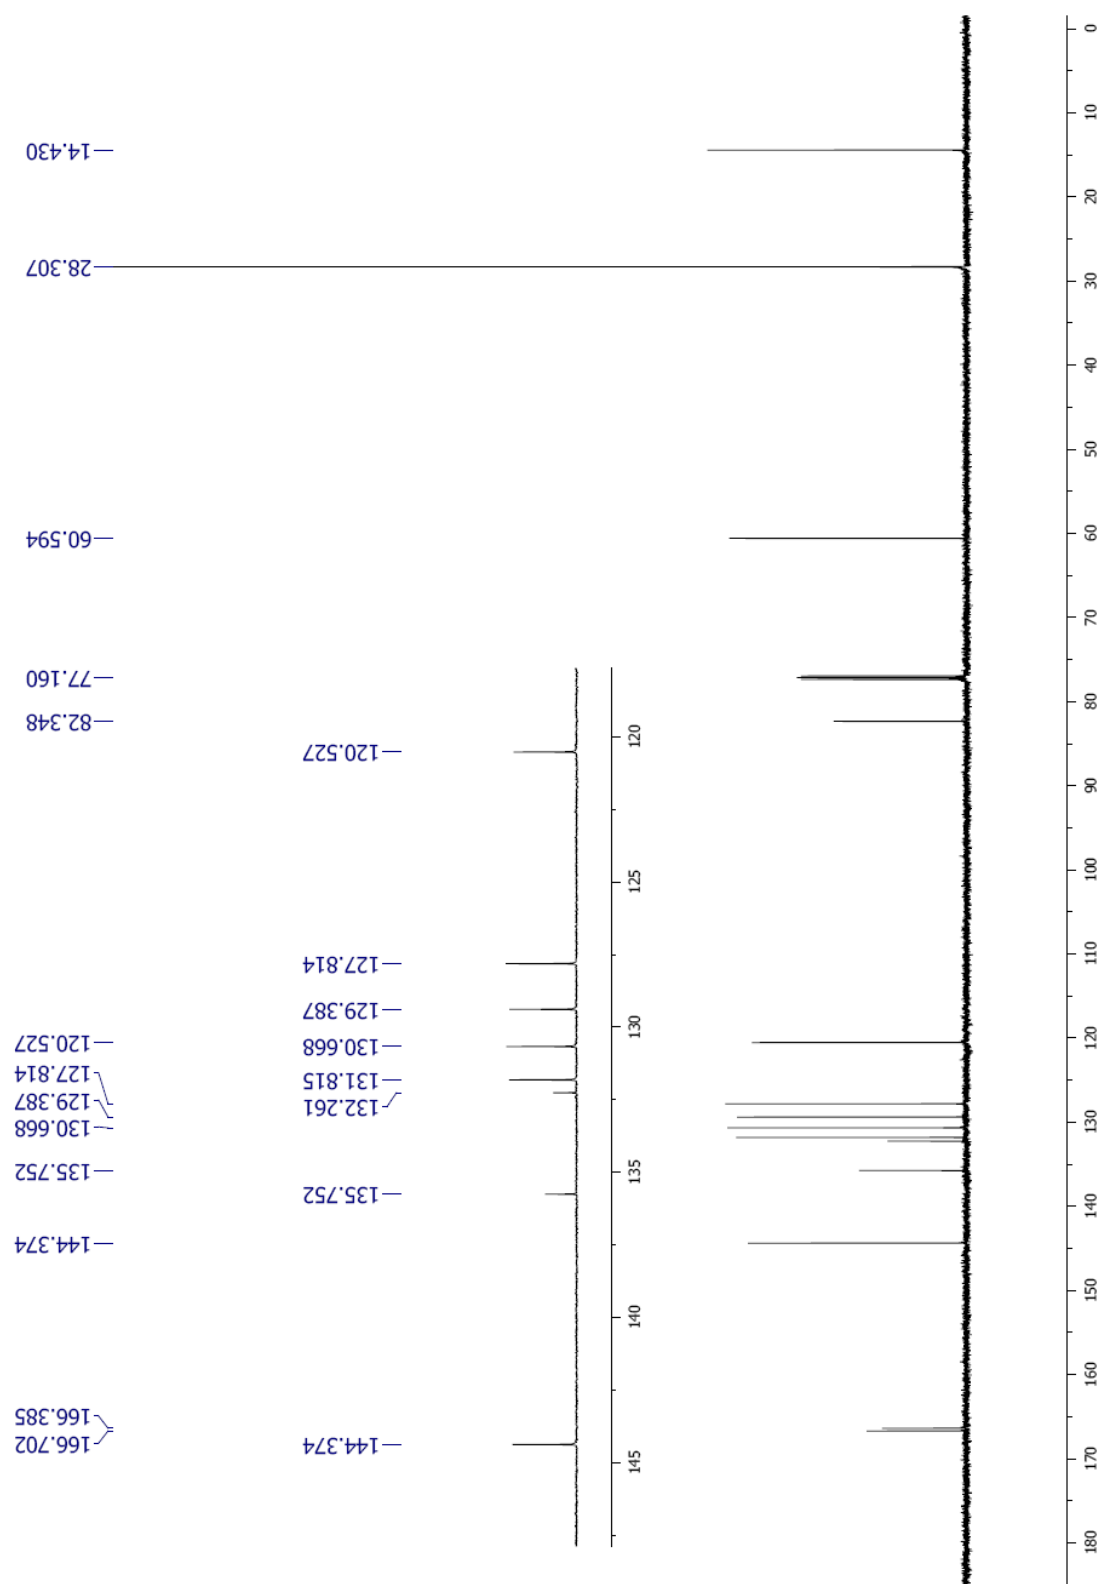

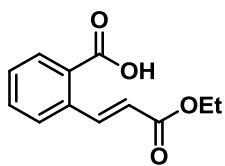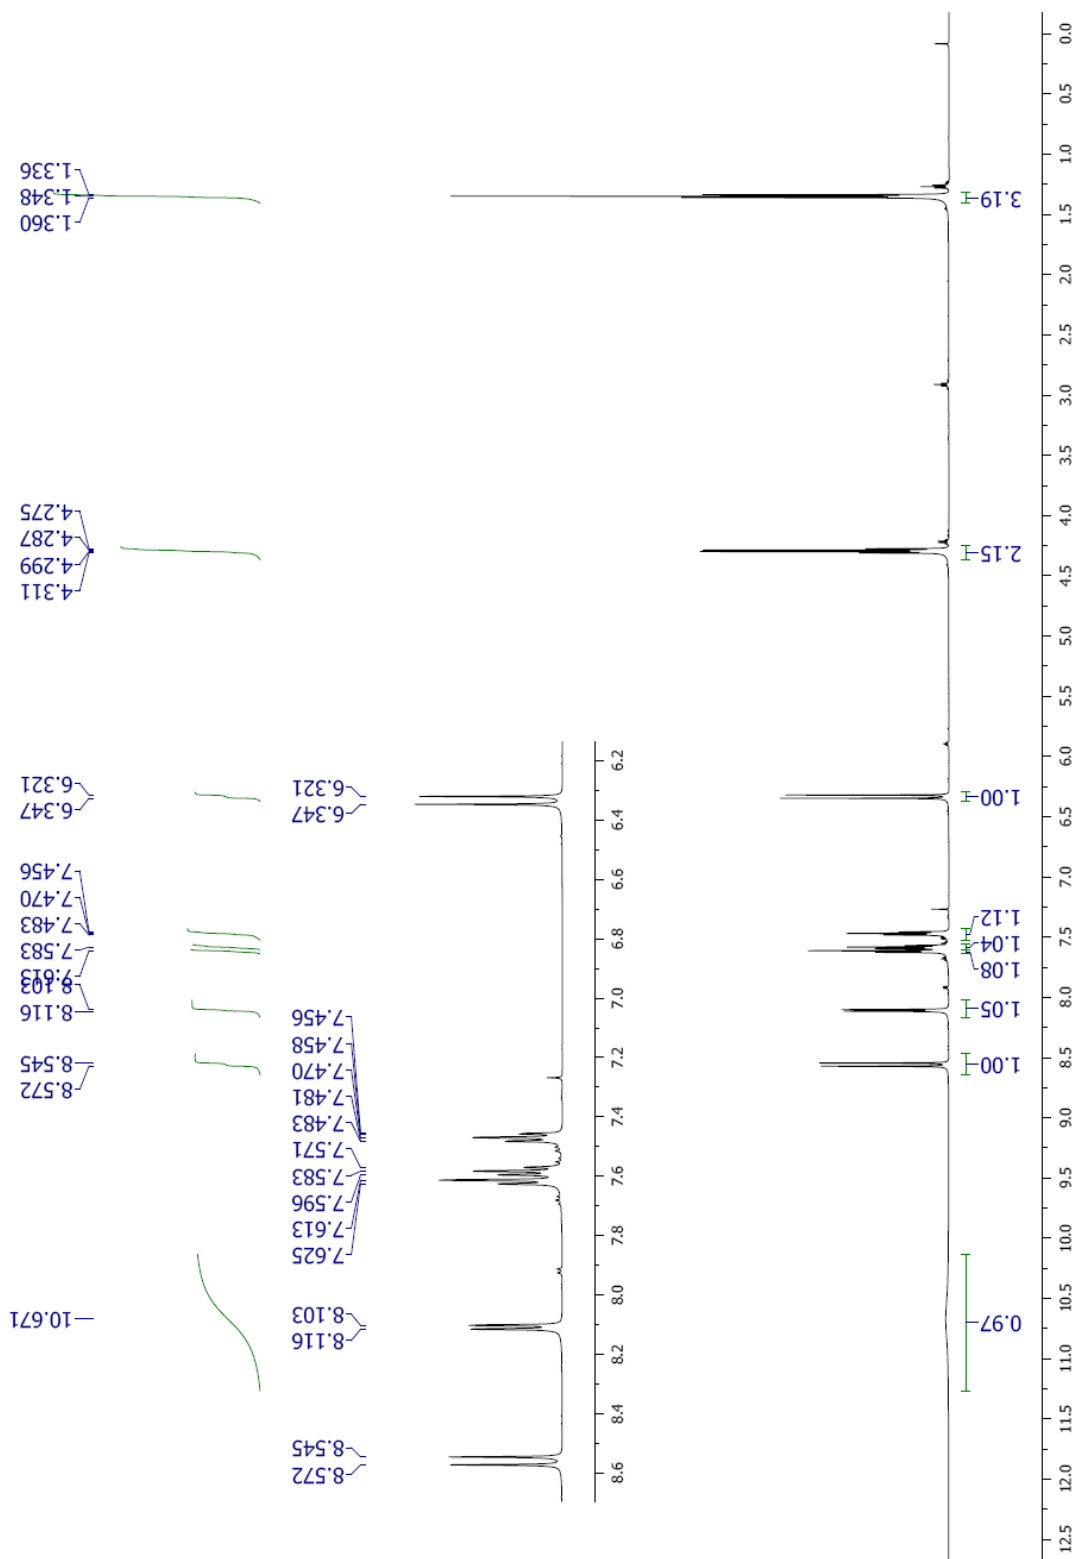

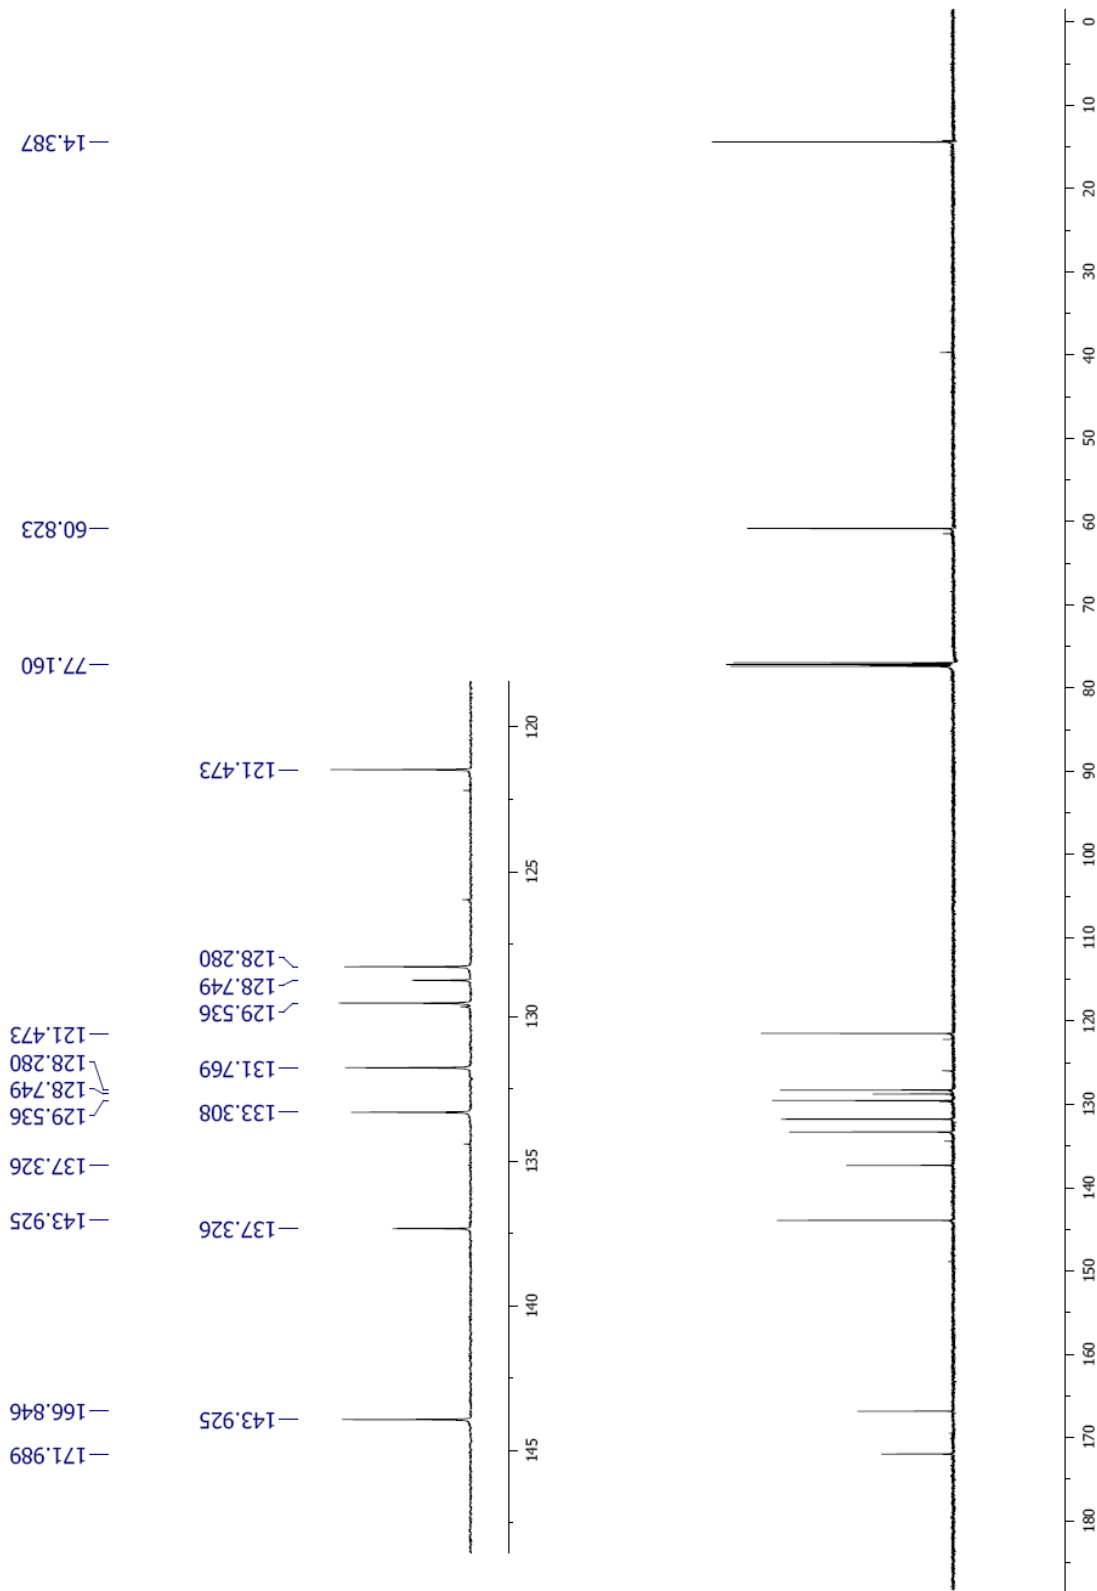

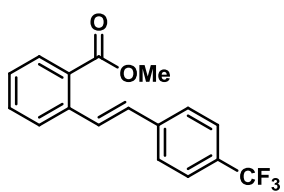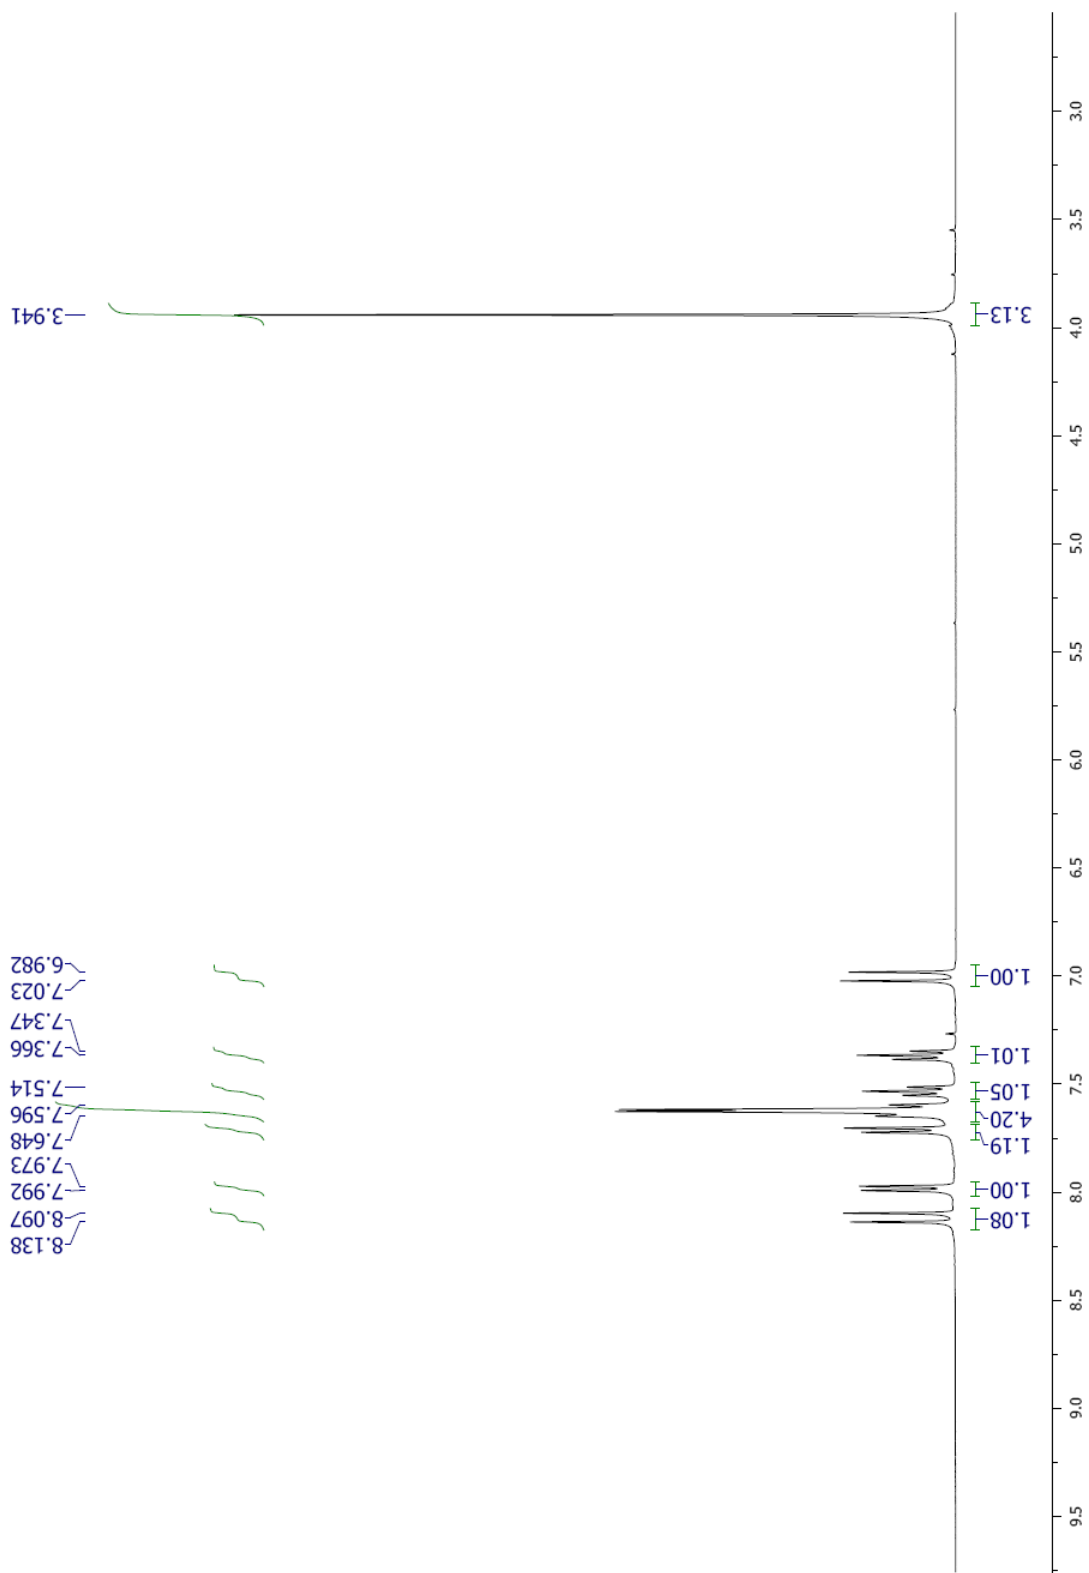



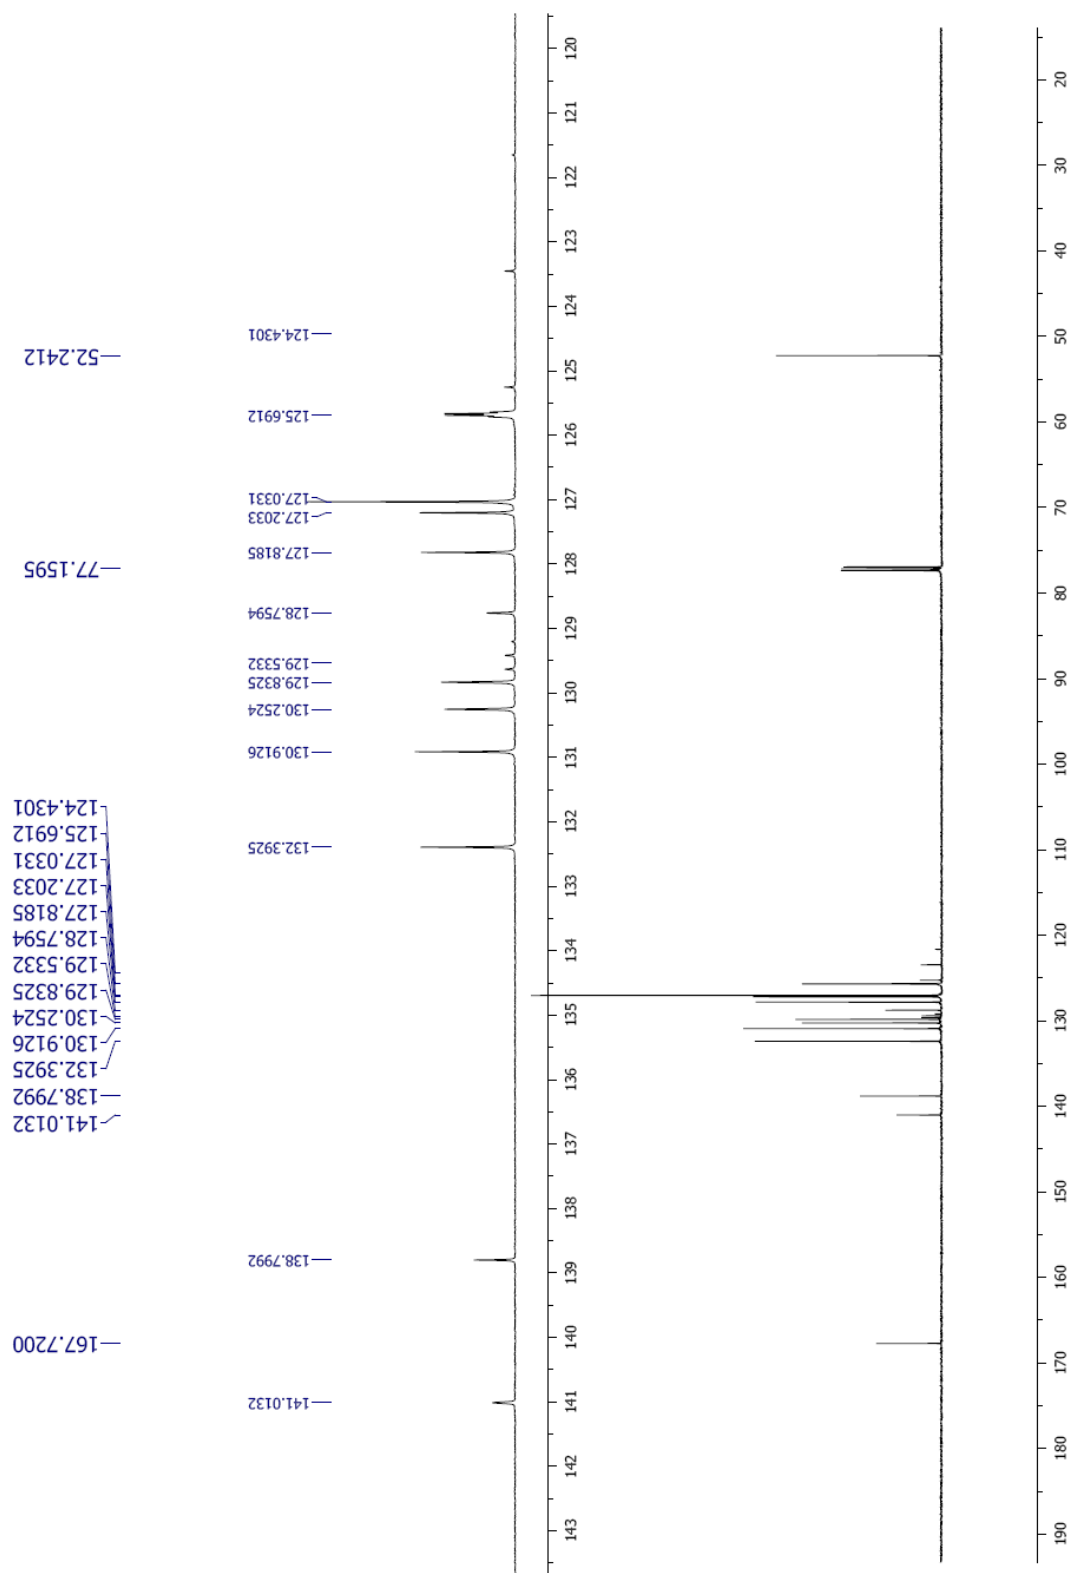

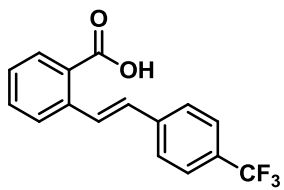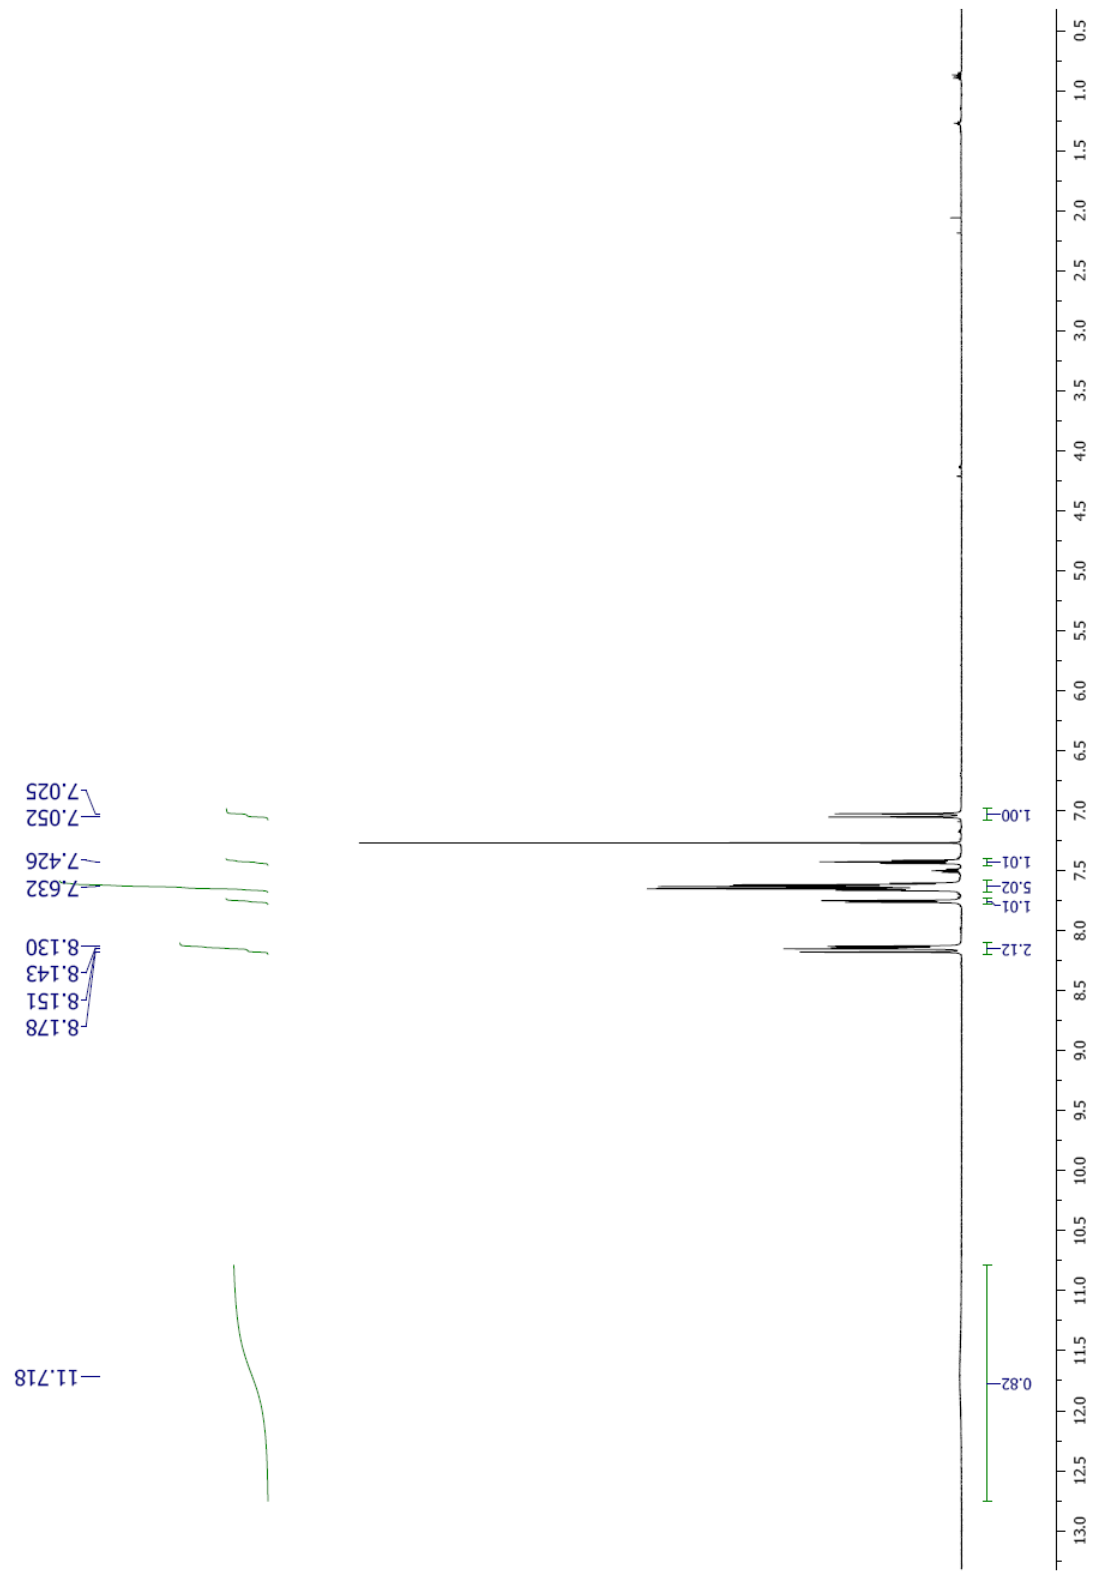

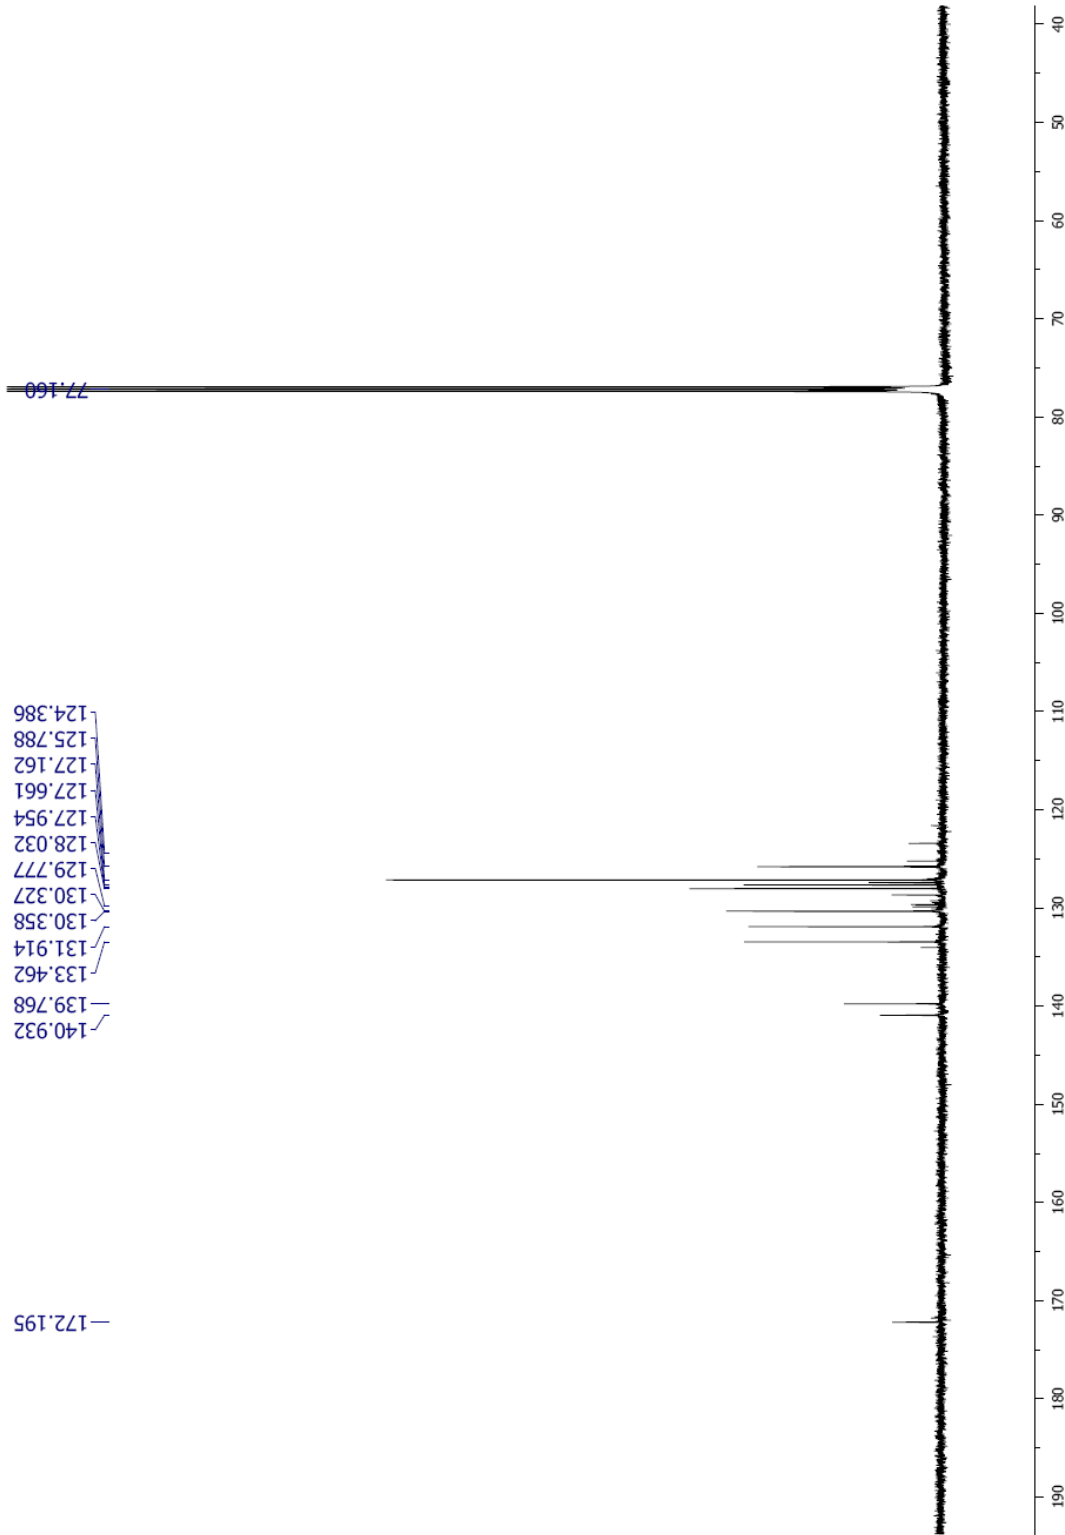

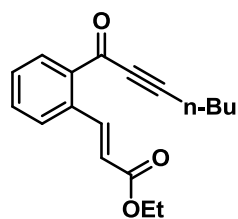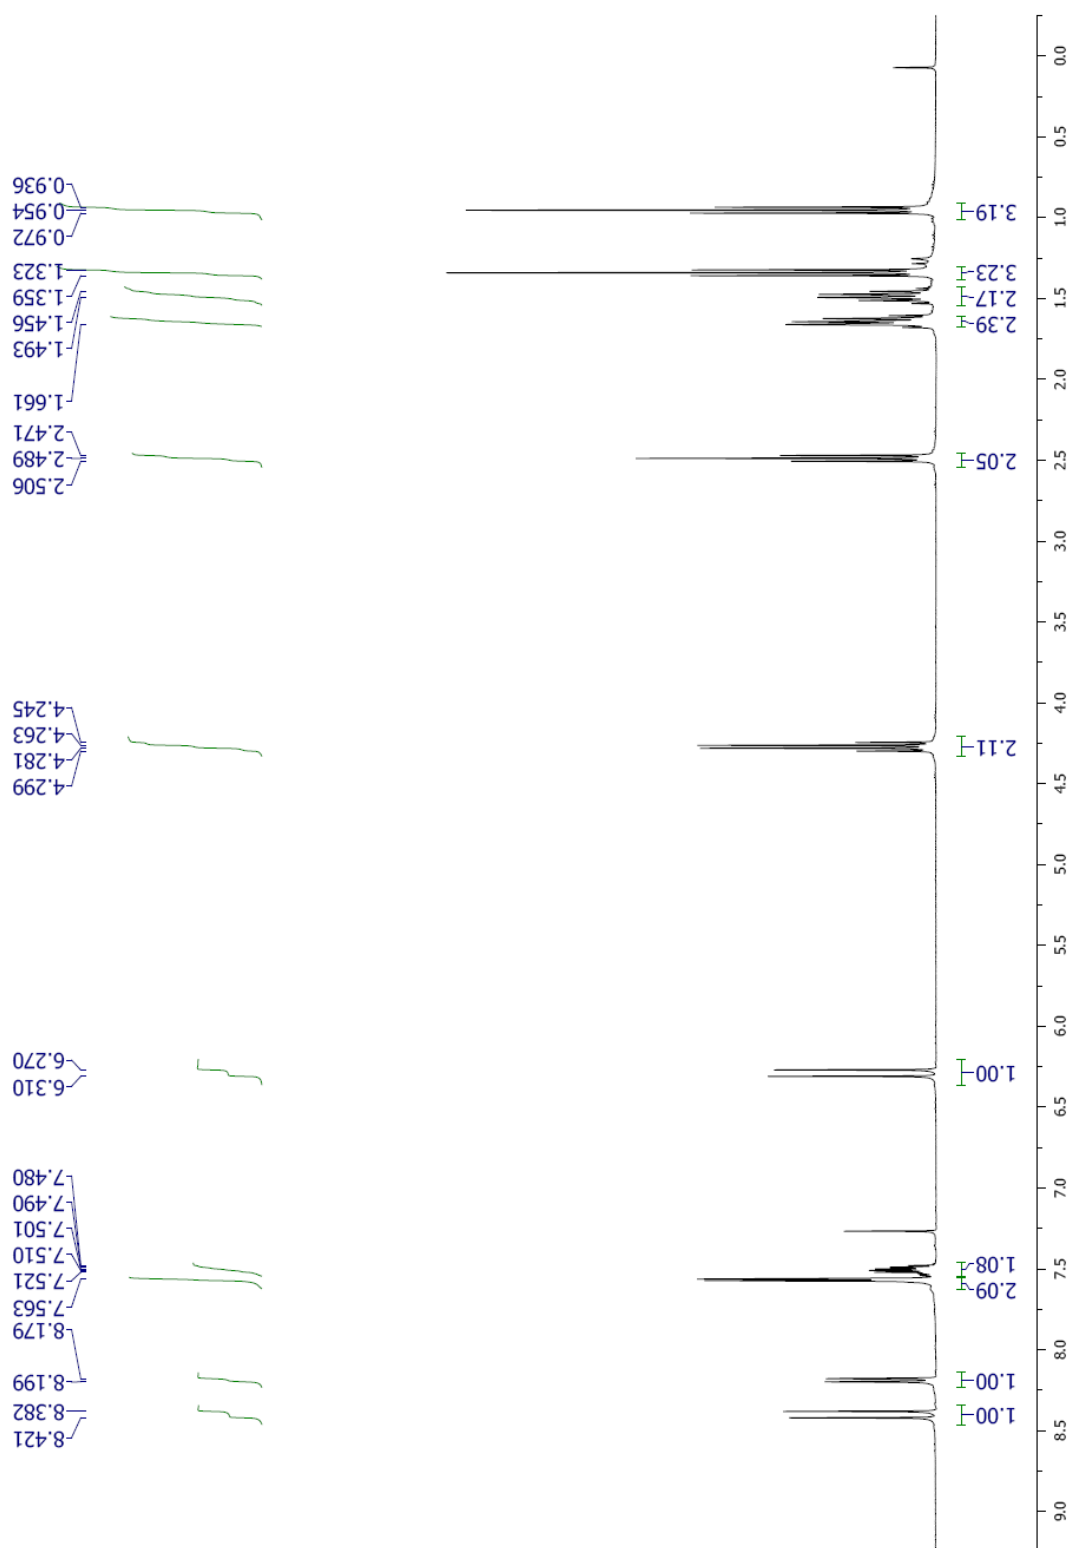

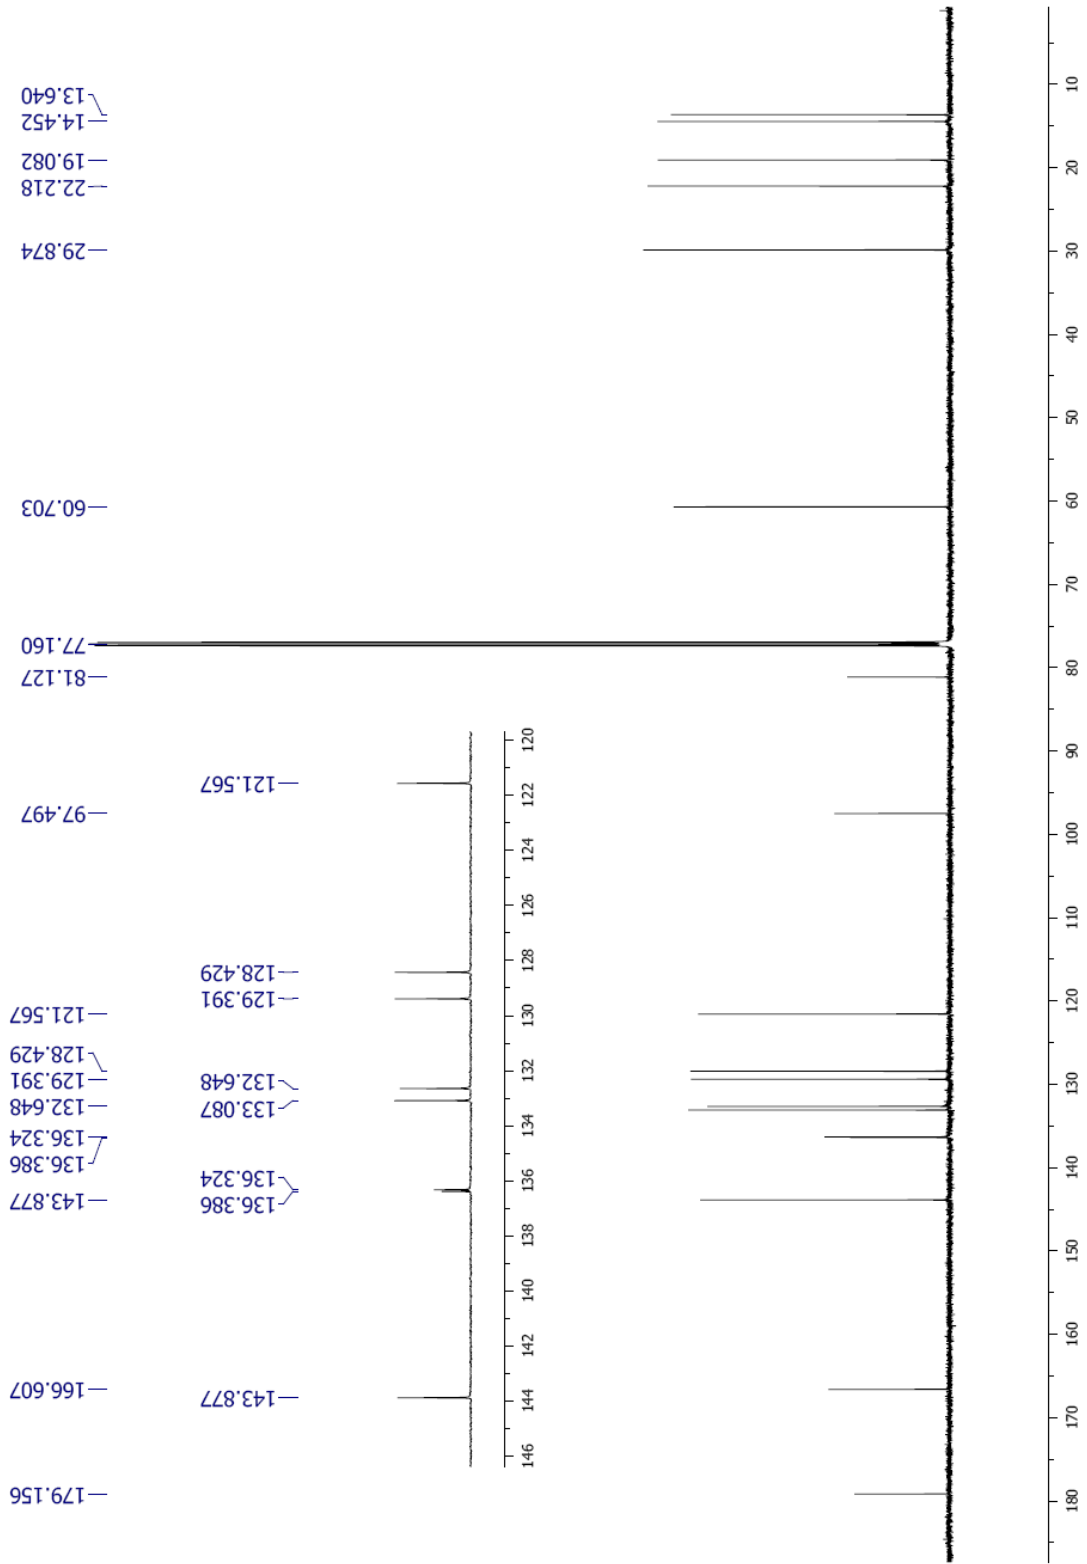

$^1\text{H}$  COSY (600 MHz)

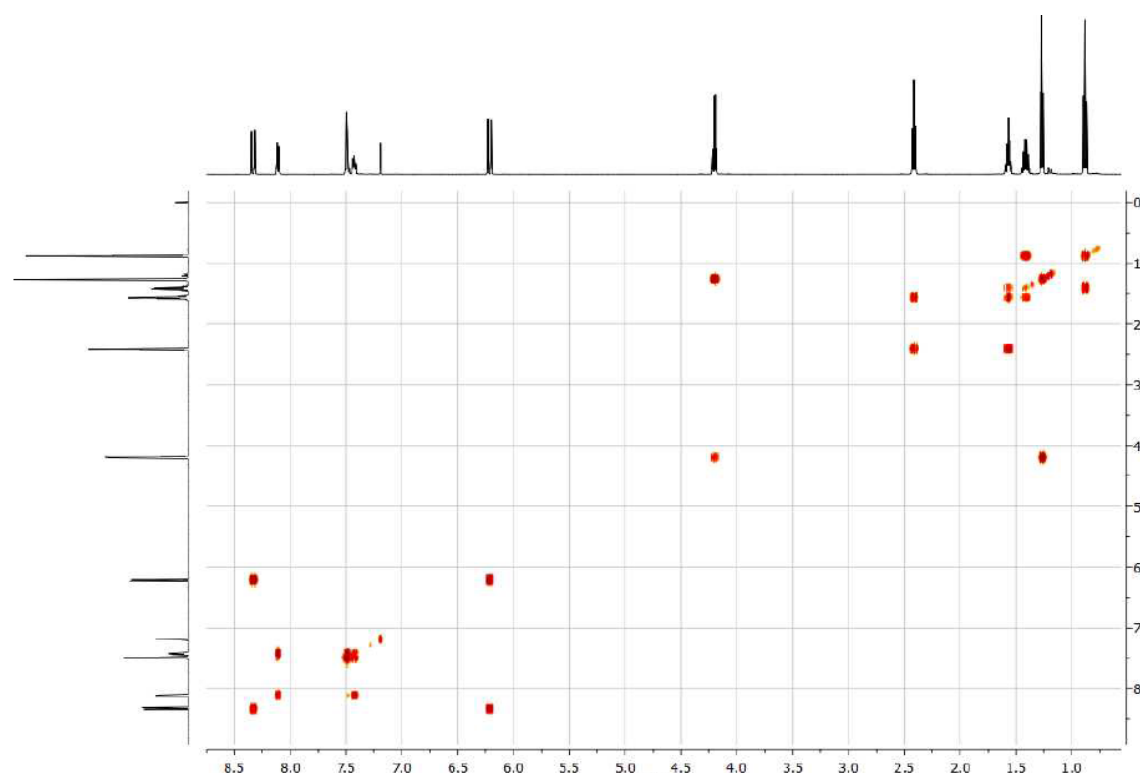

$^{13}\text{C}$  DEPT 135 (101 Mhz)

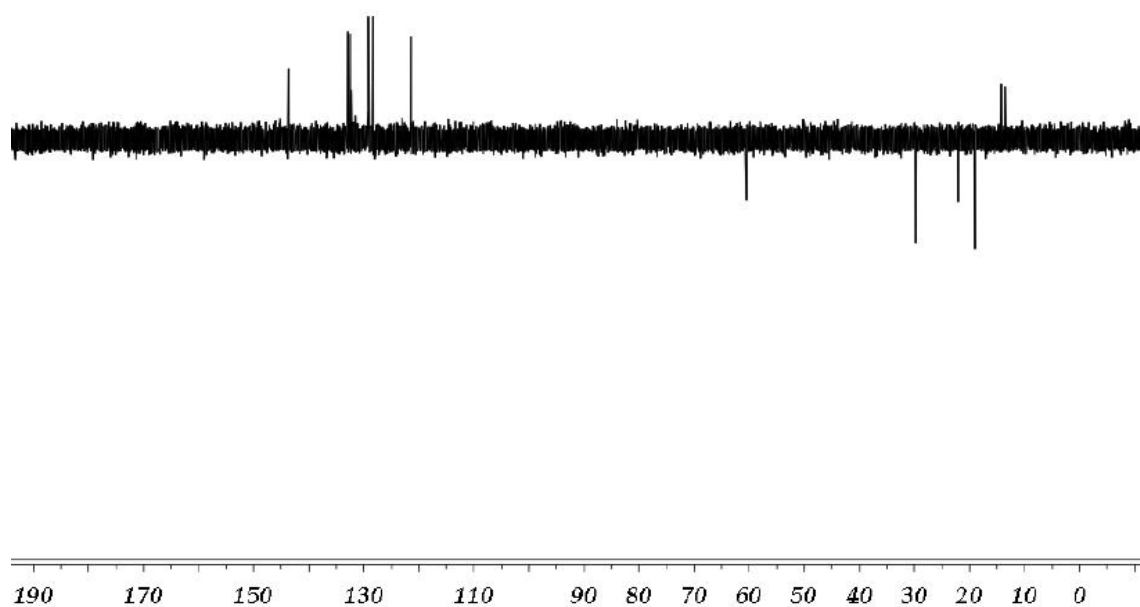

$^1\text{H}$ - $^{13}\text{C}$  HSQC (600 MHz)

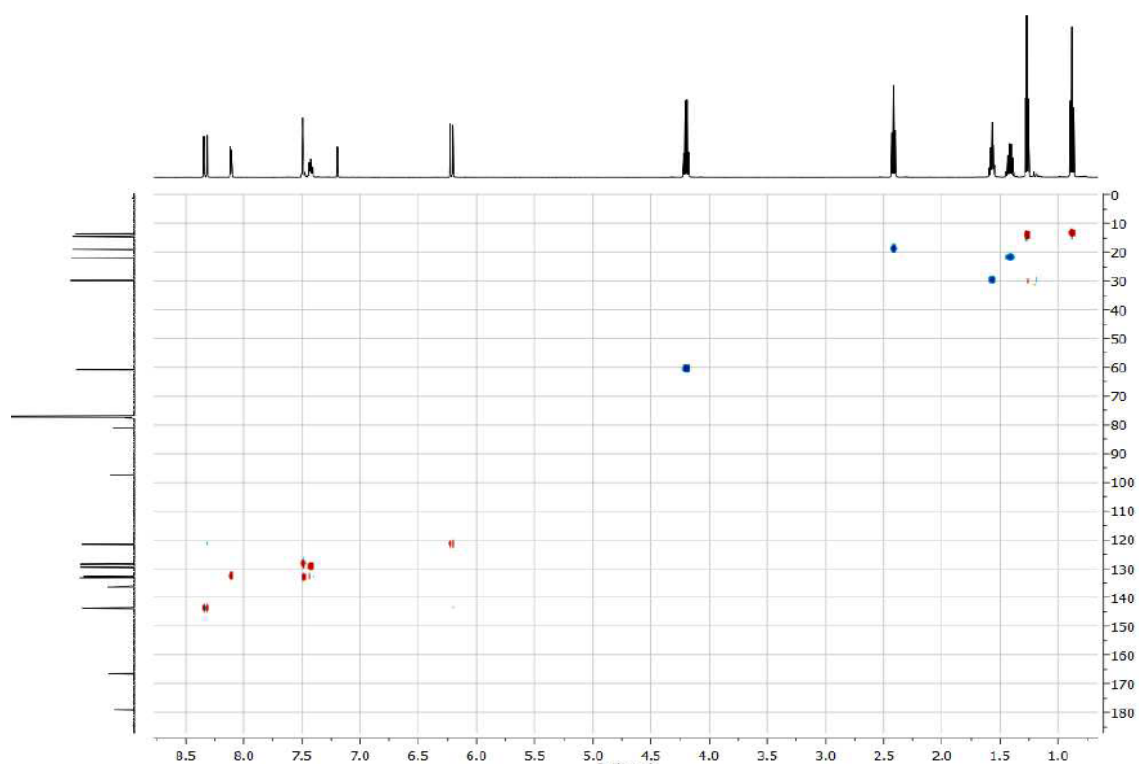

$^1\text{H}$ - $^{13}\text{C}$  HMBC (600 MHz)

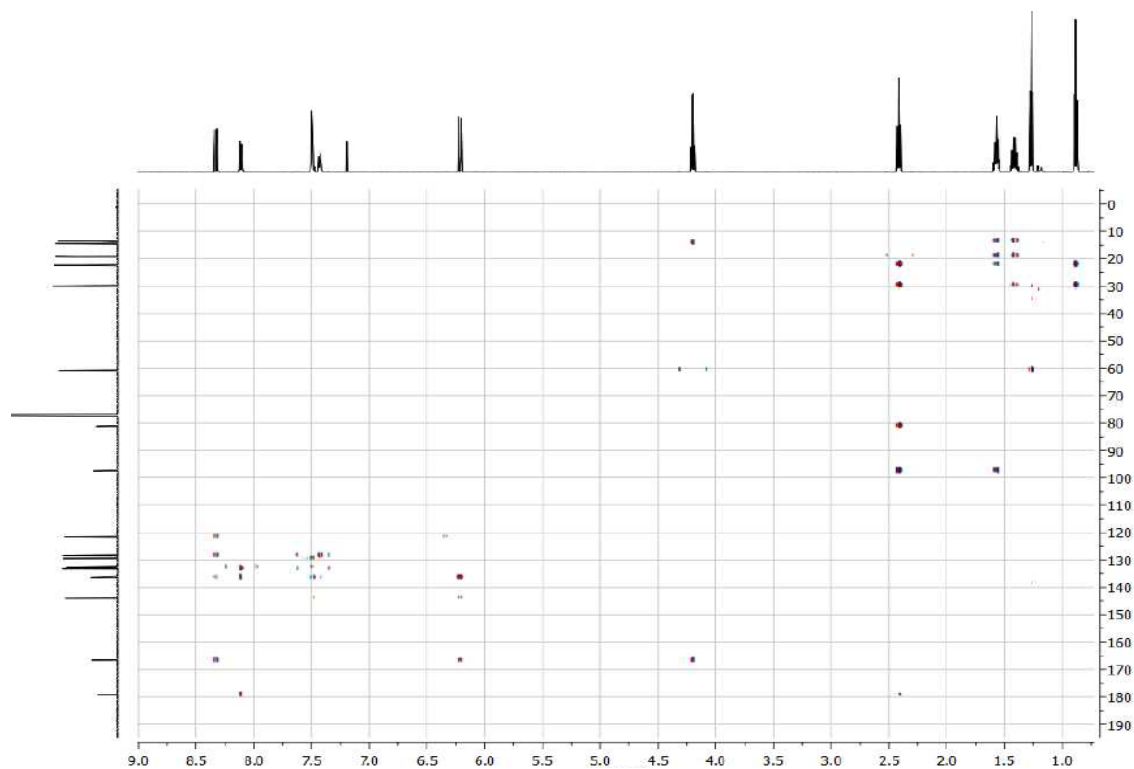



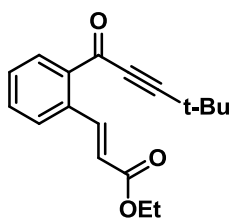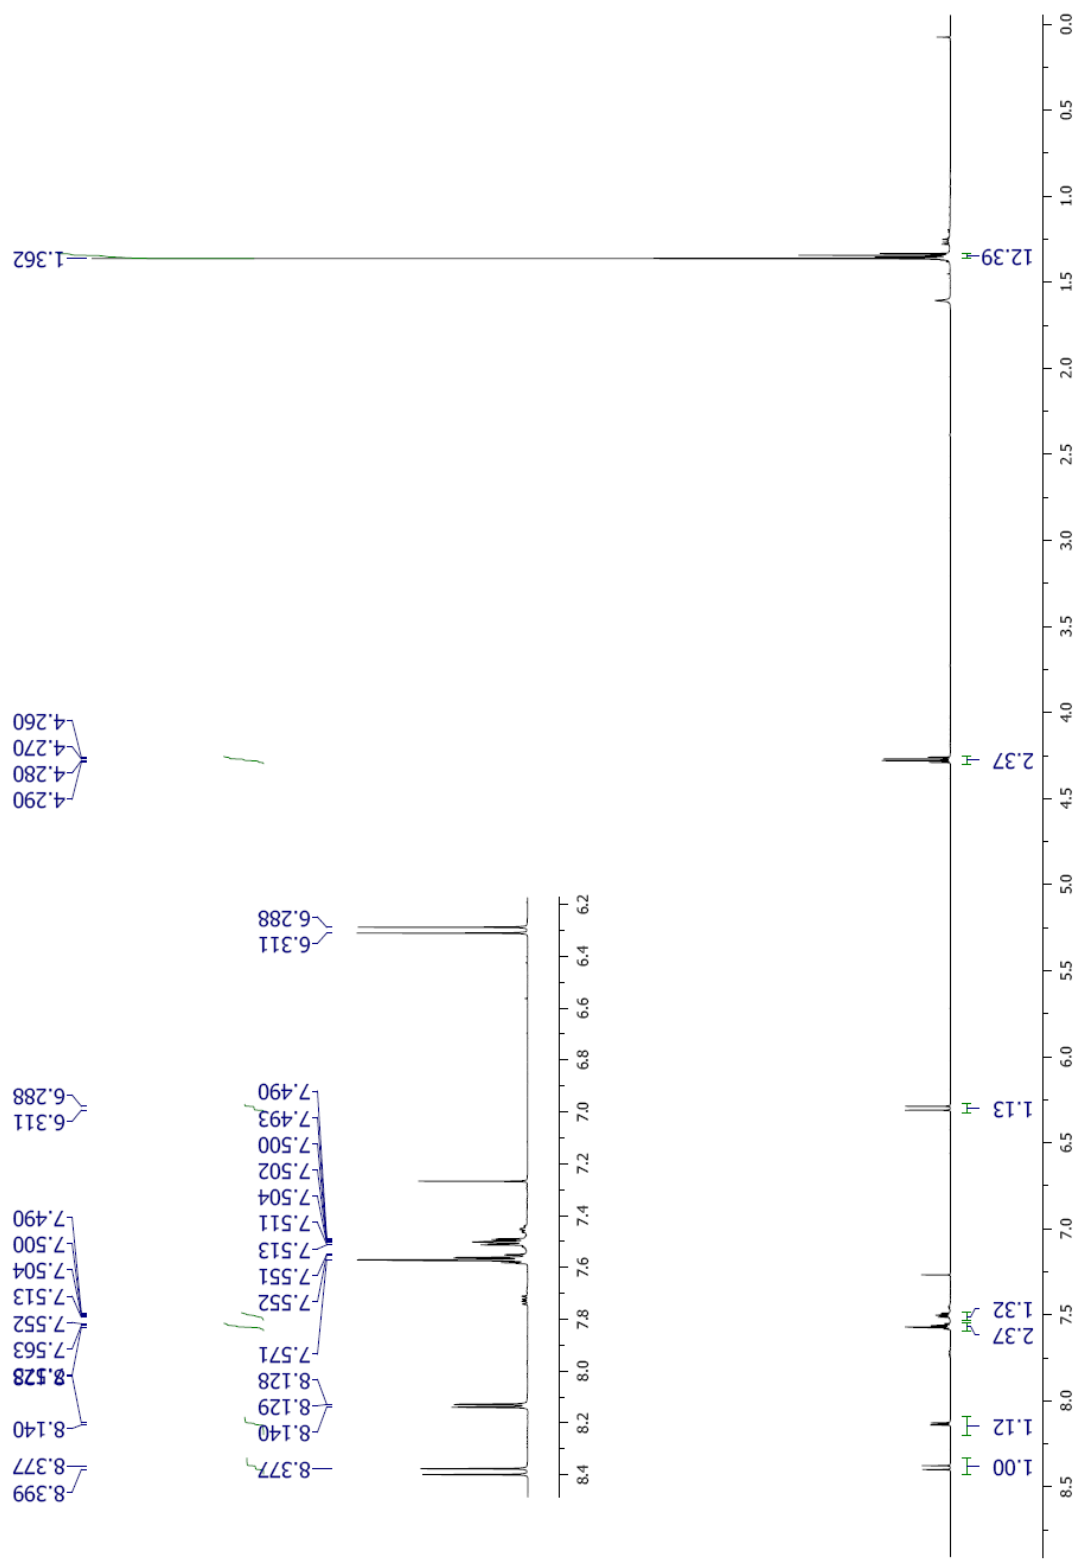

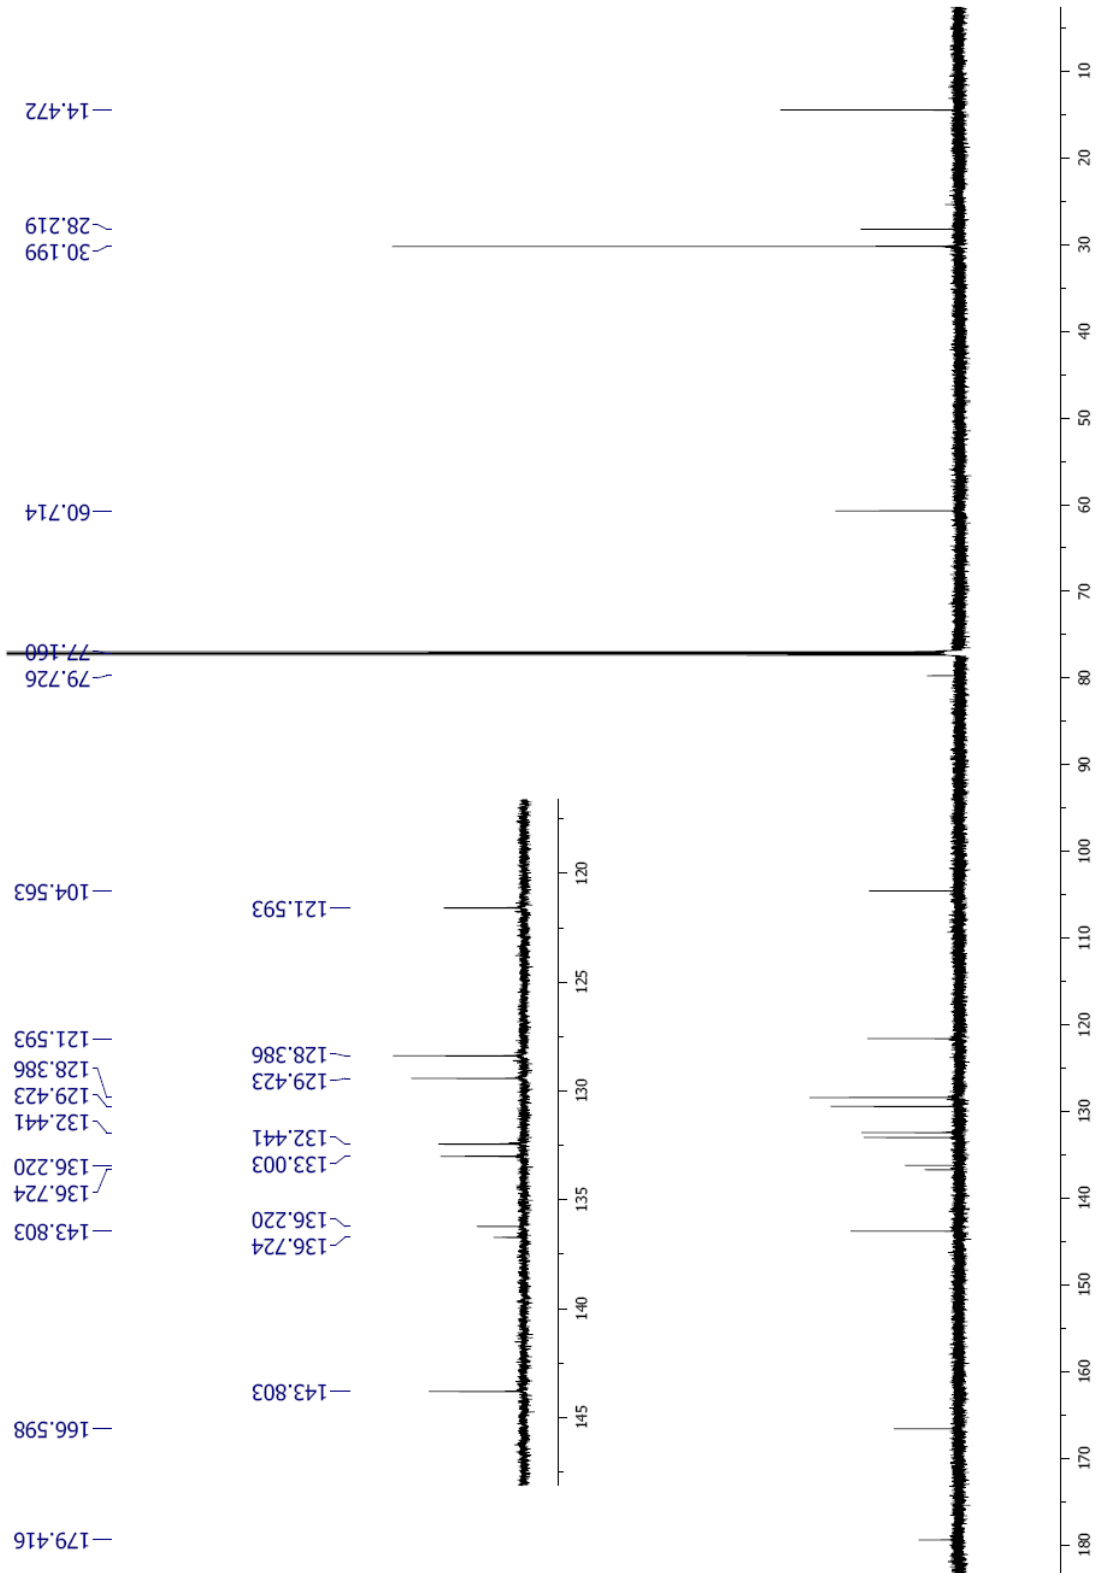

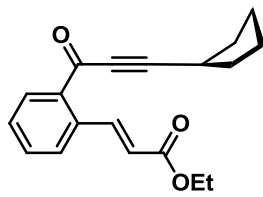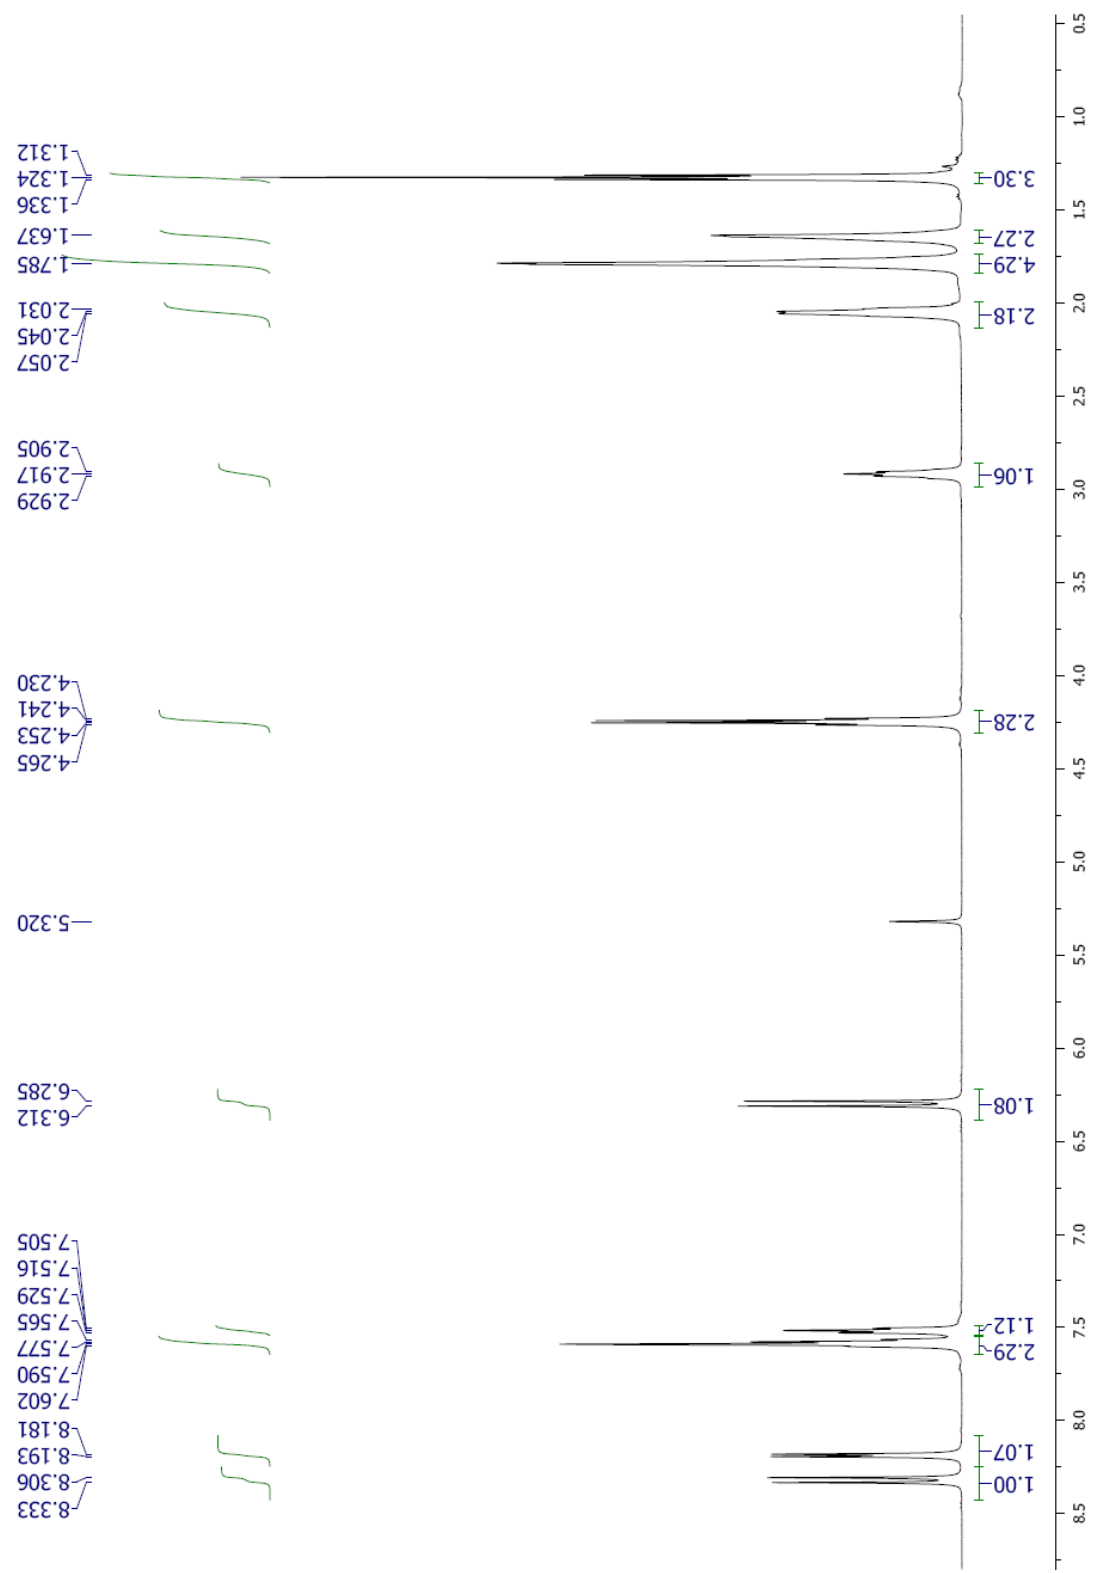

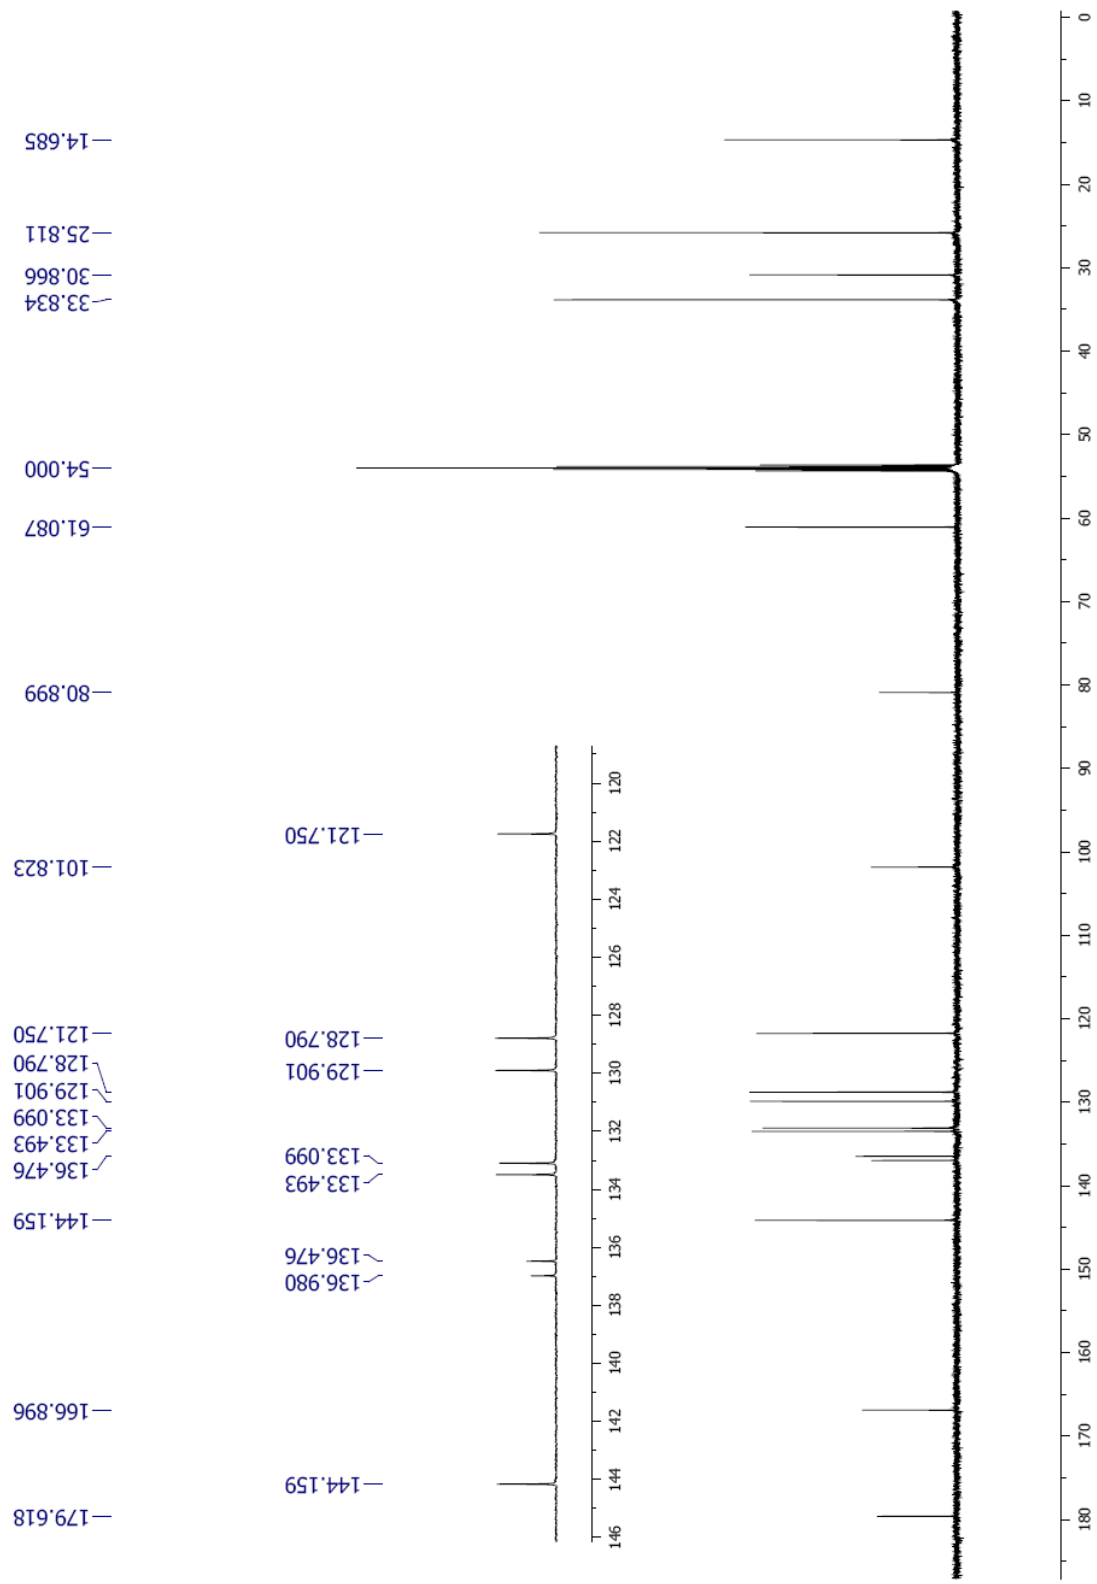

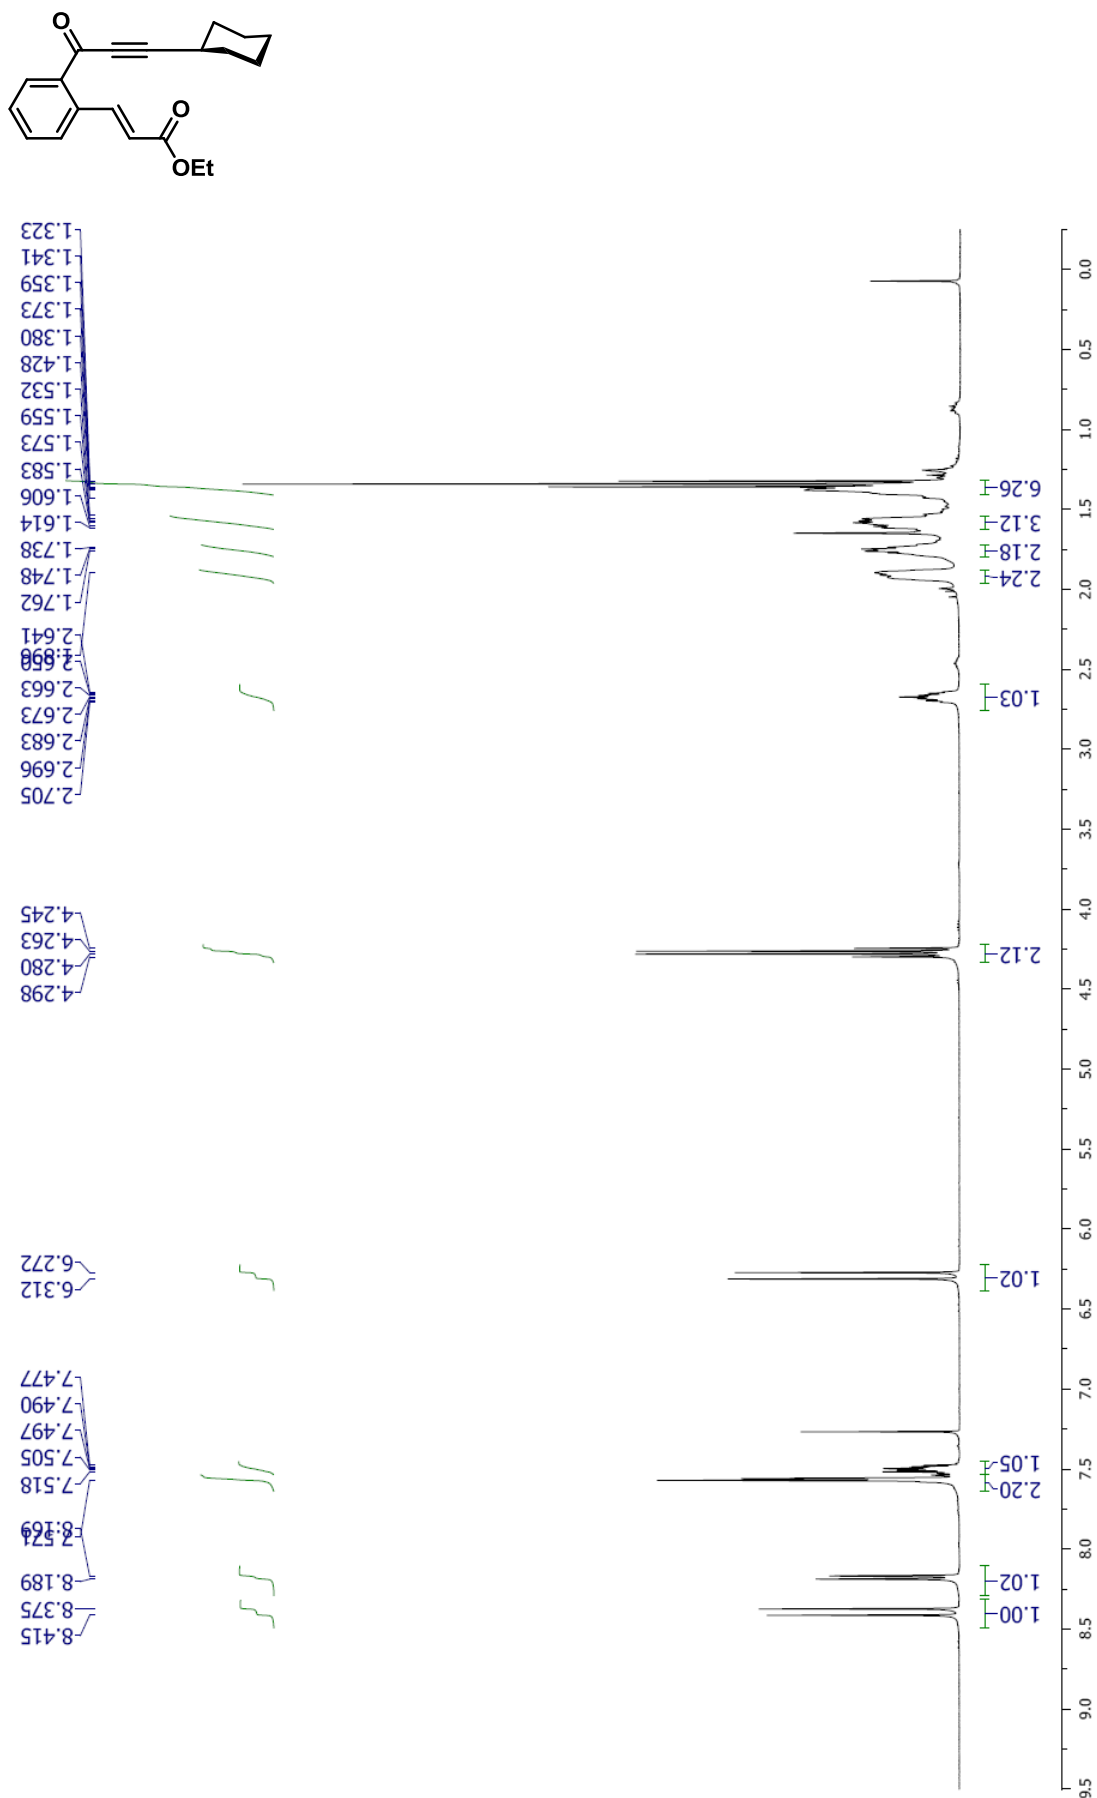

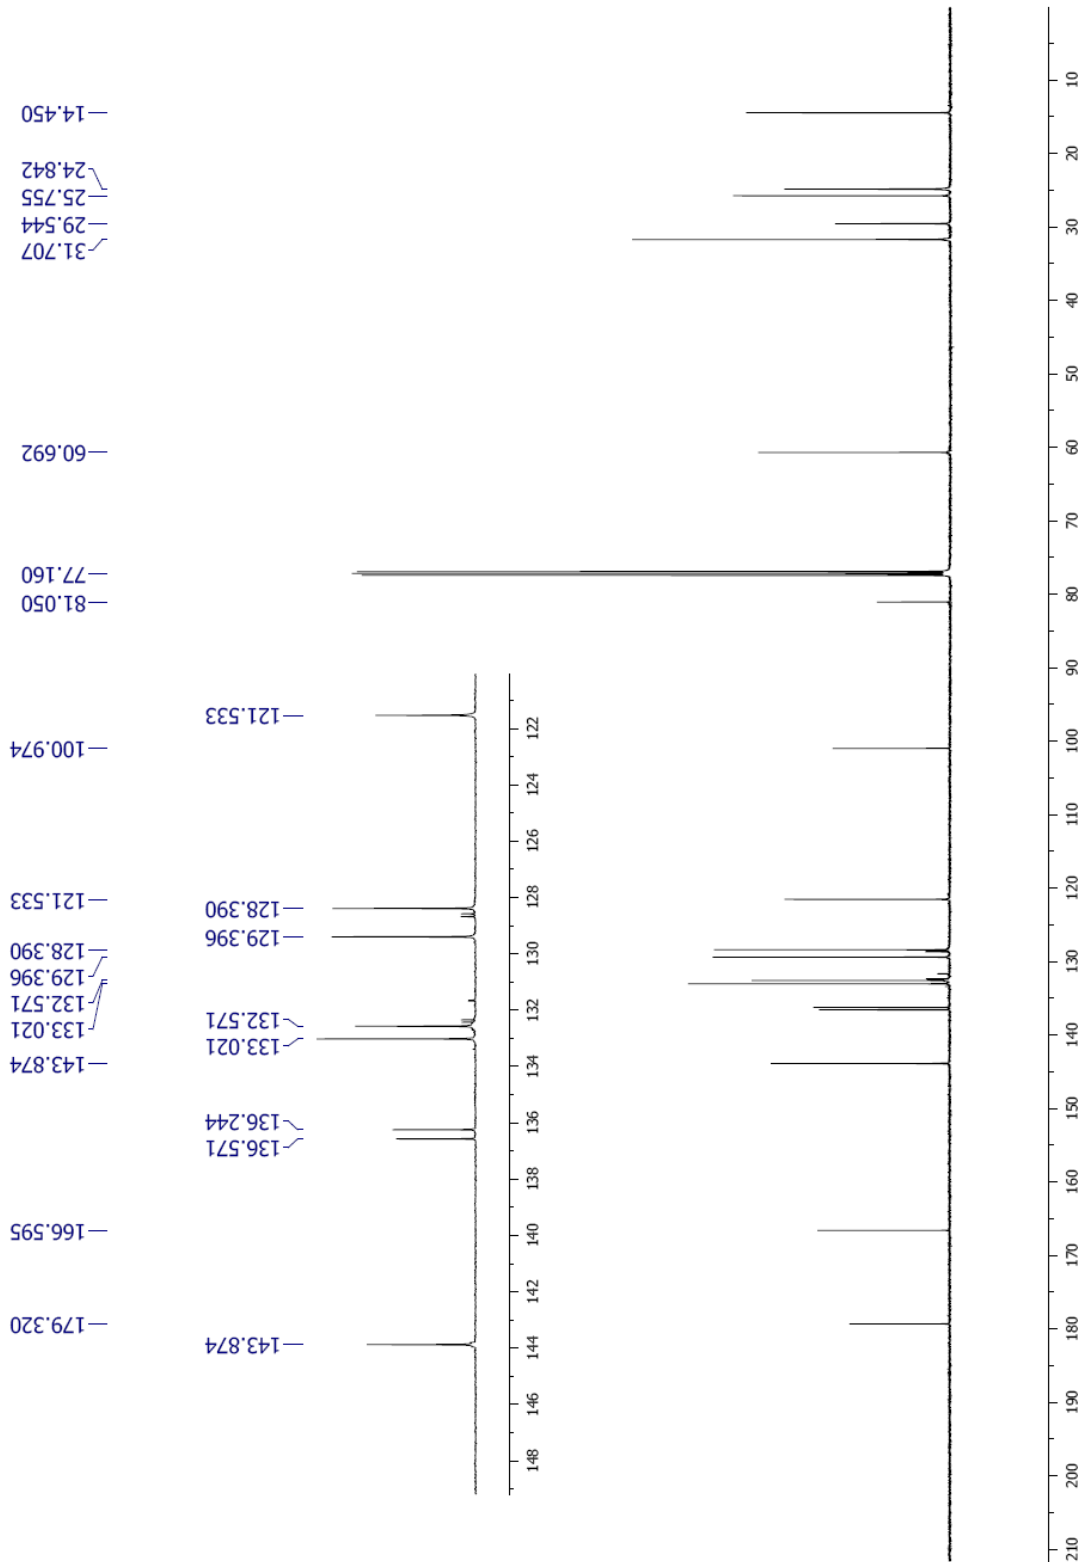

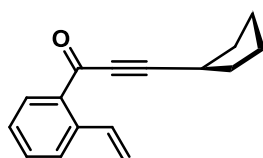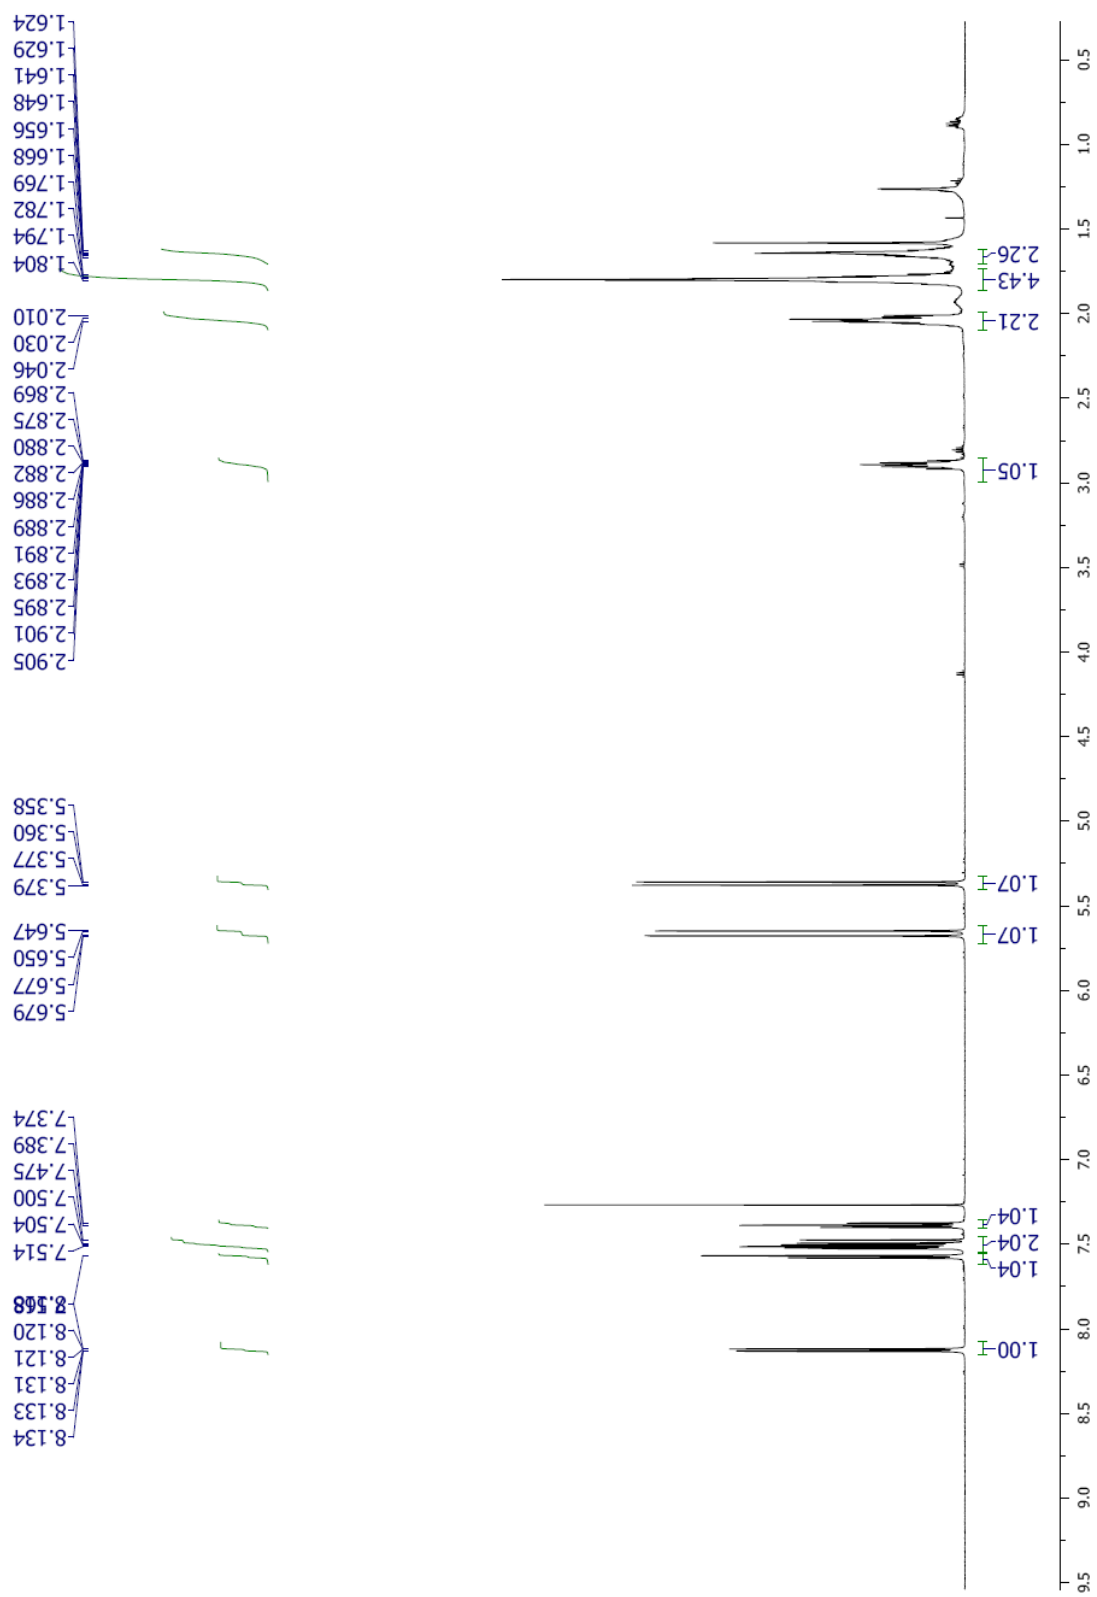



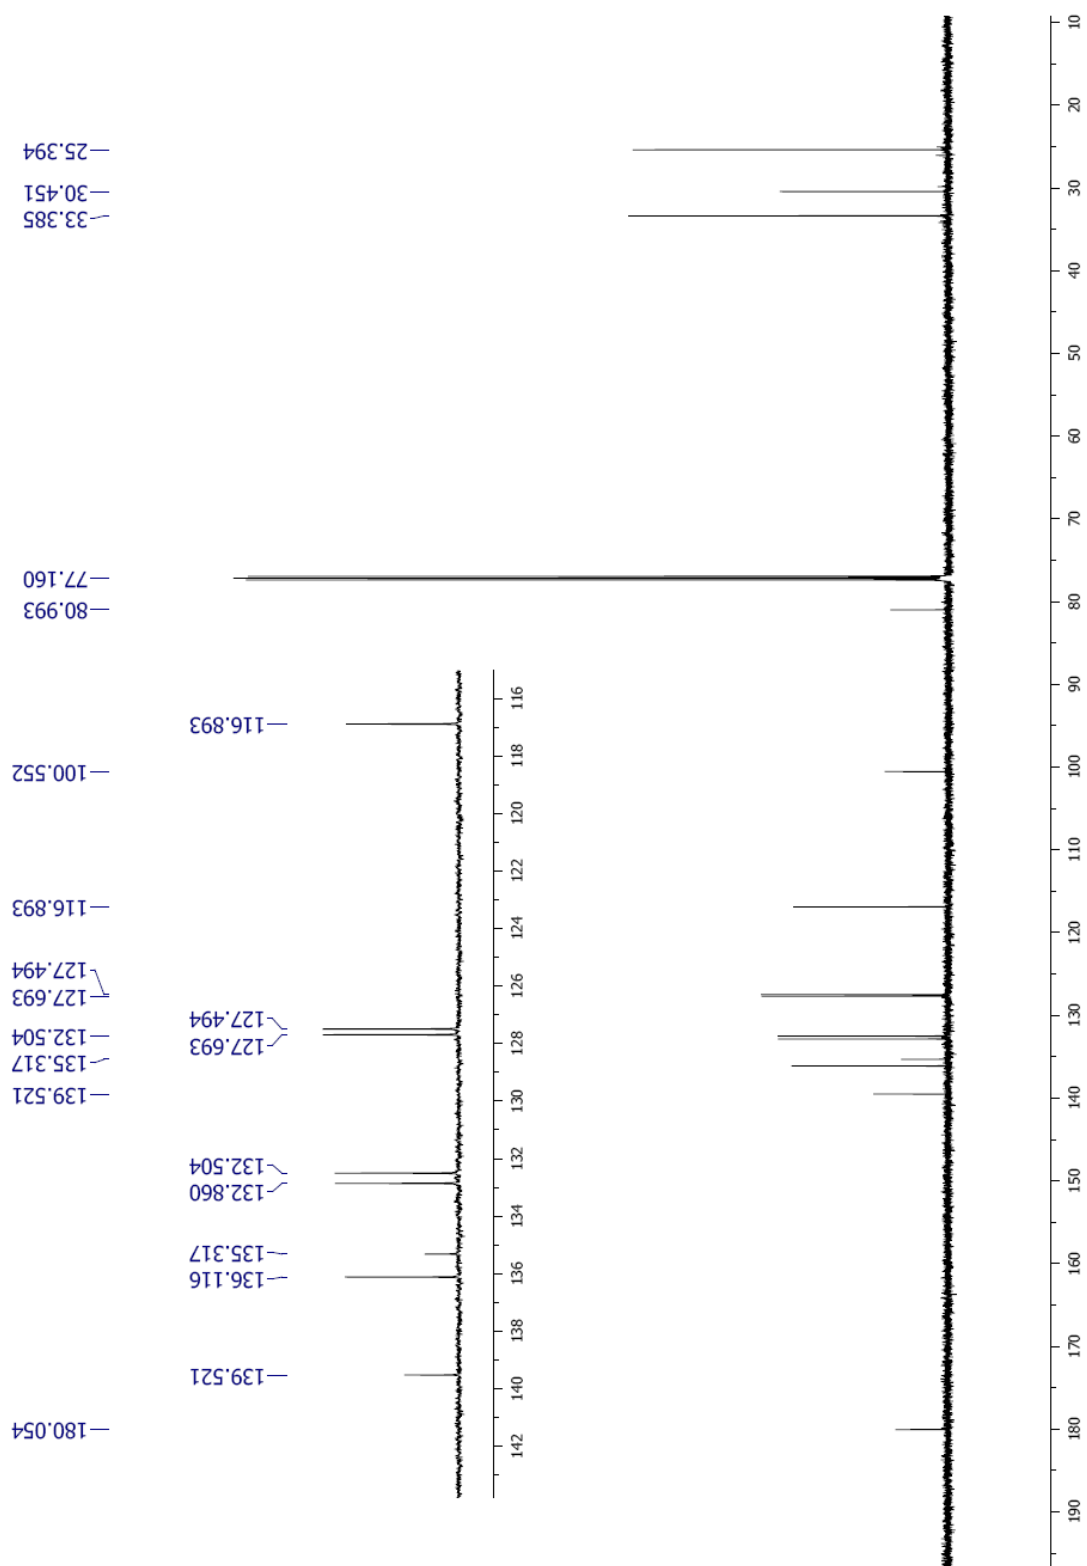

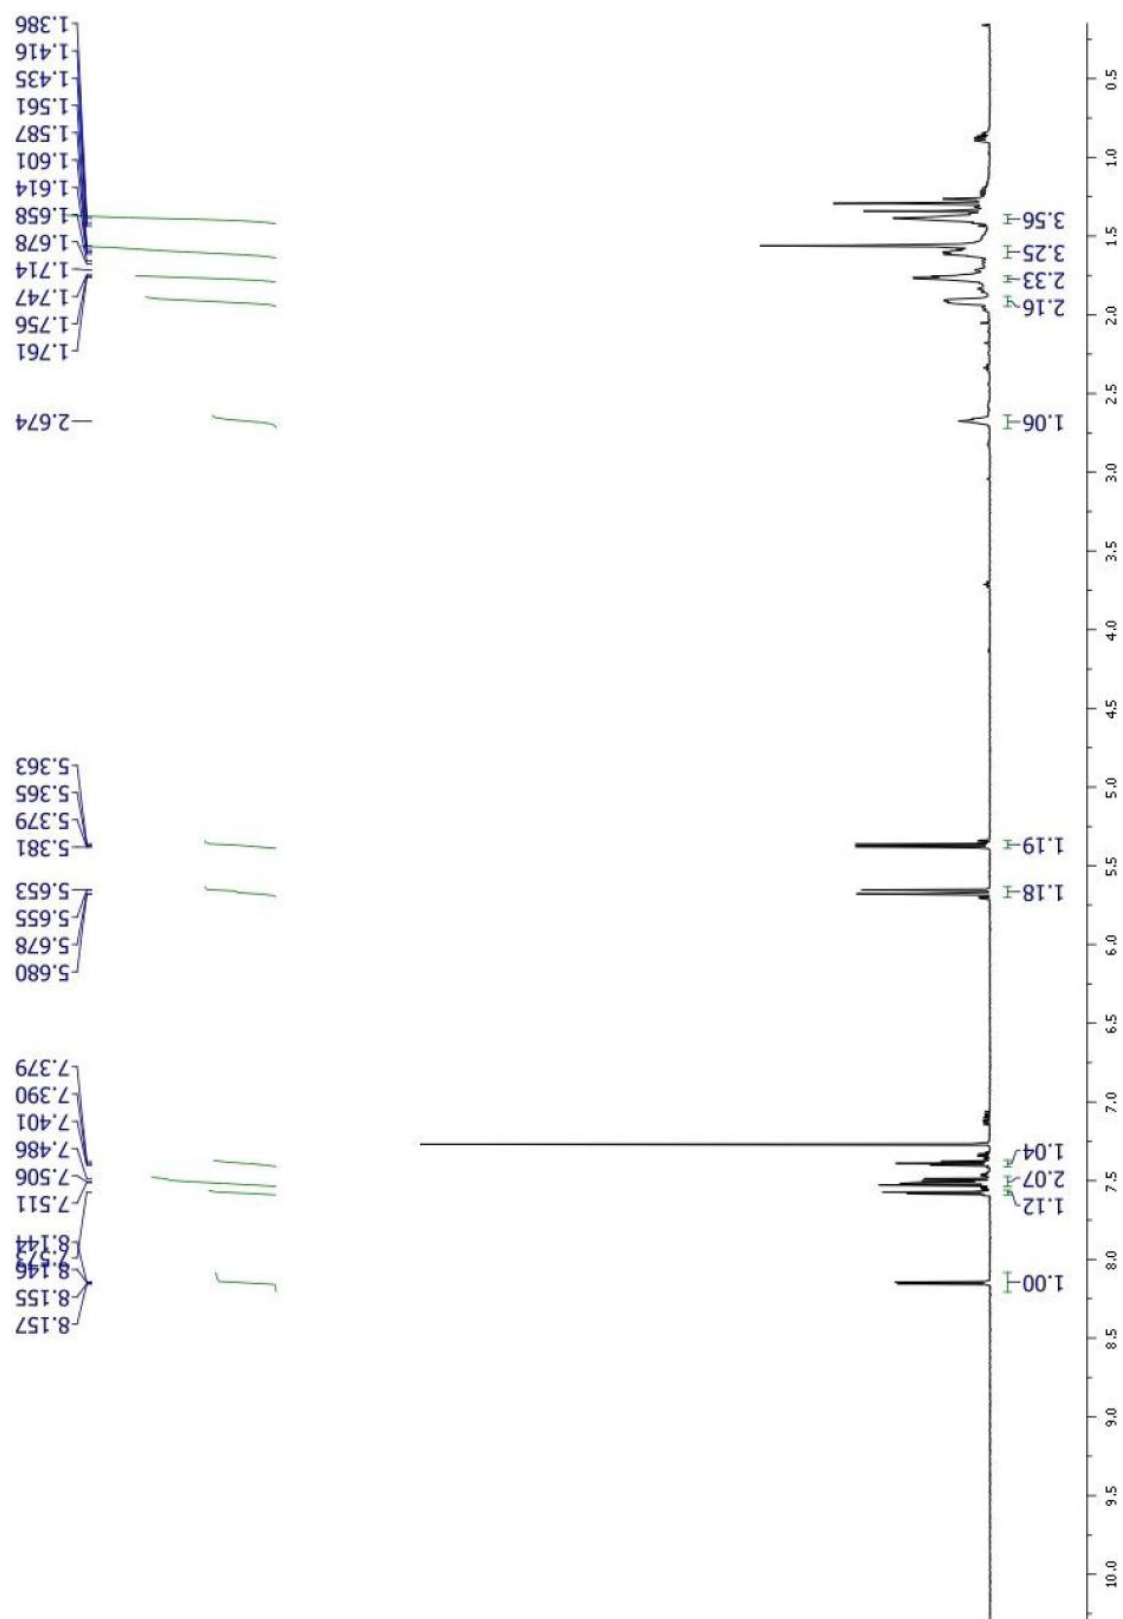

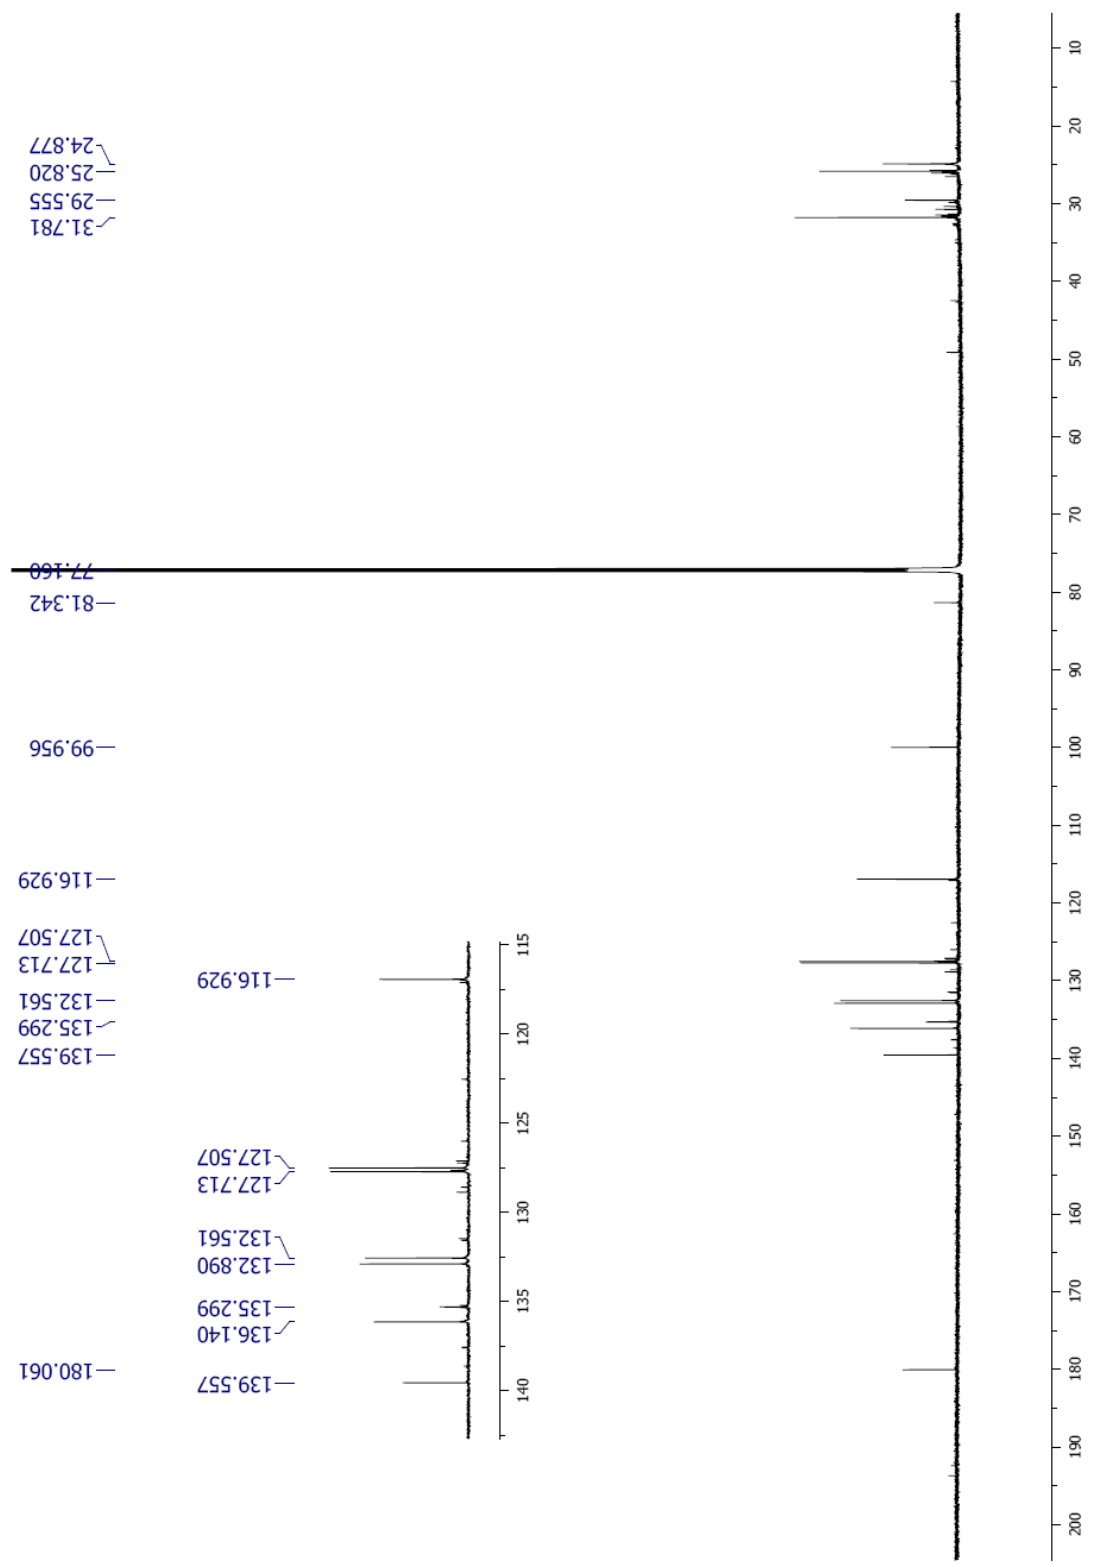

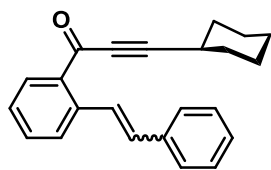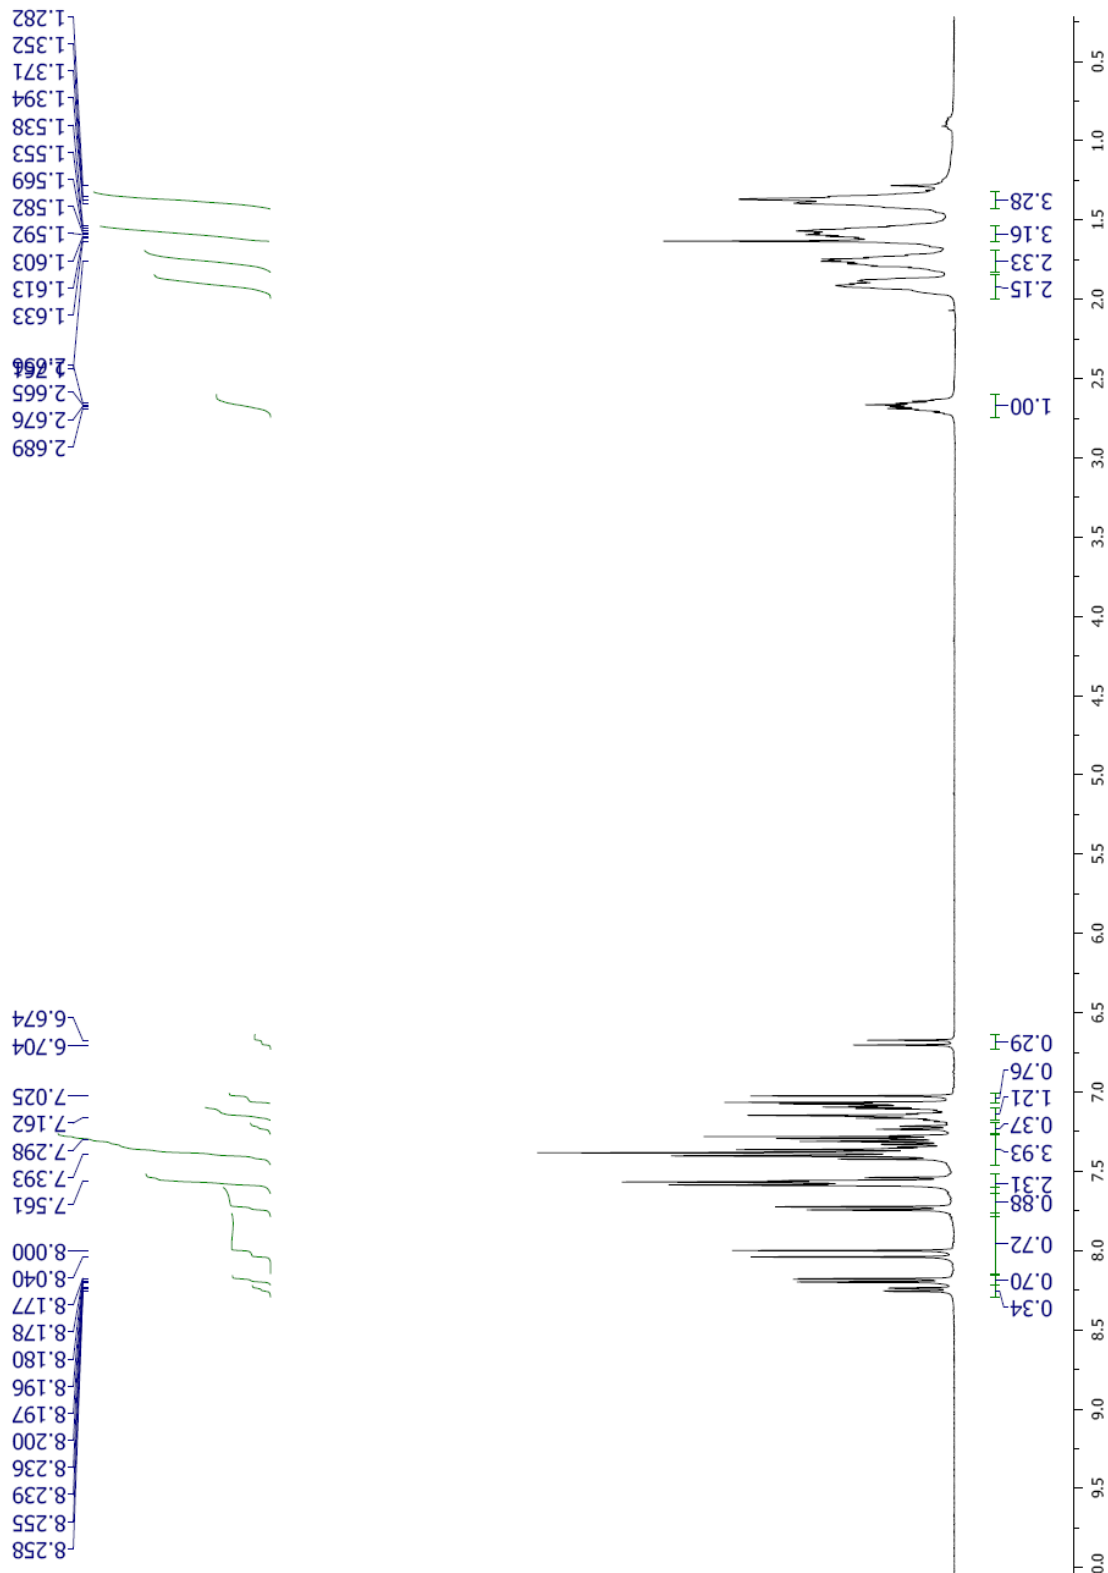

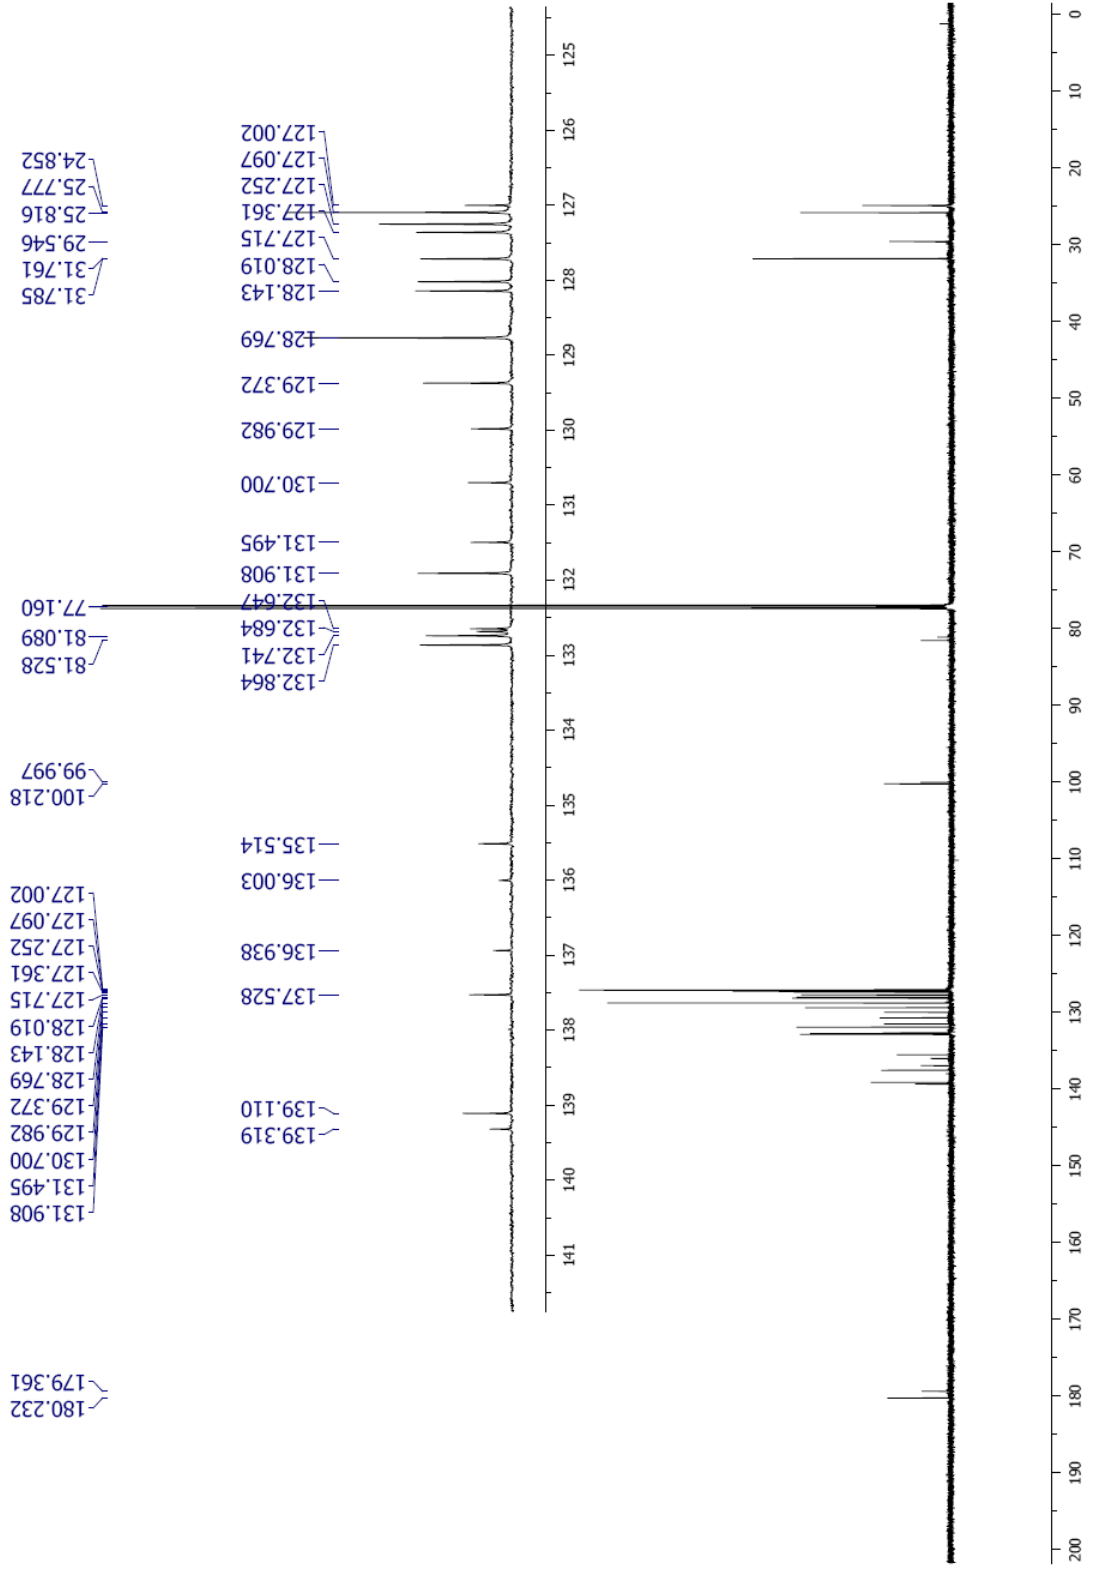

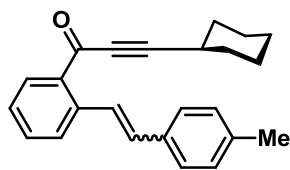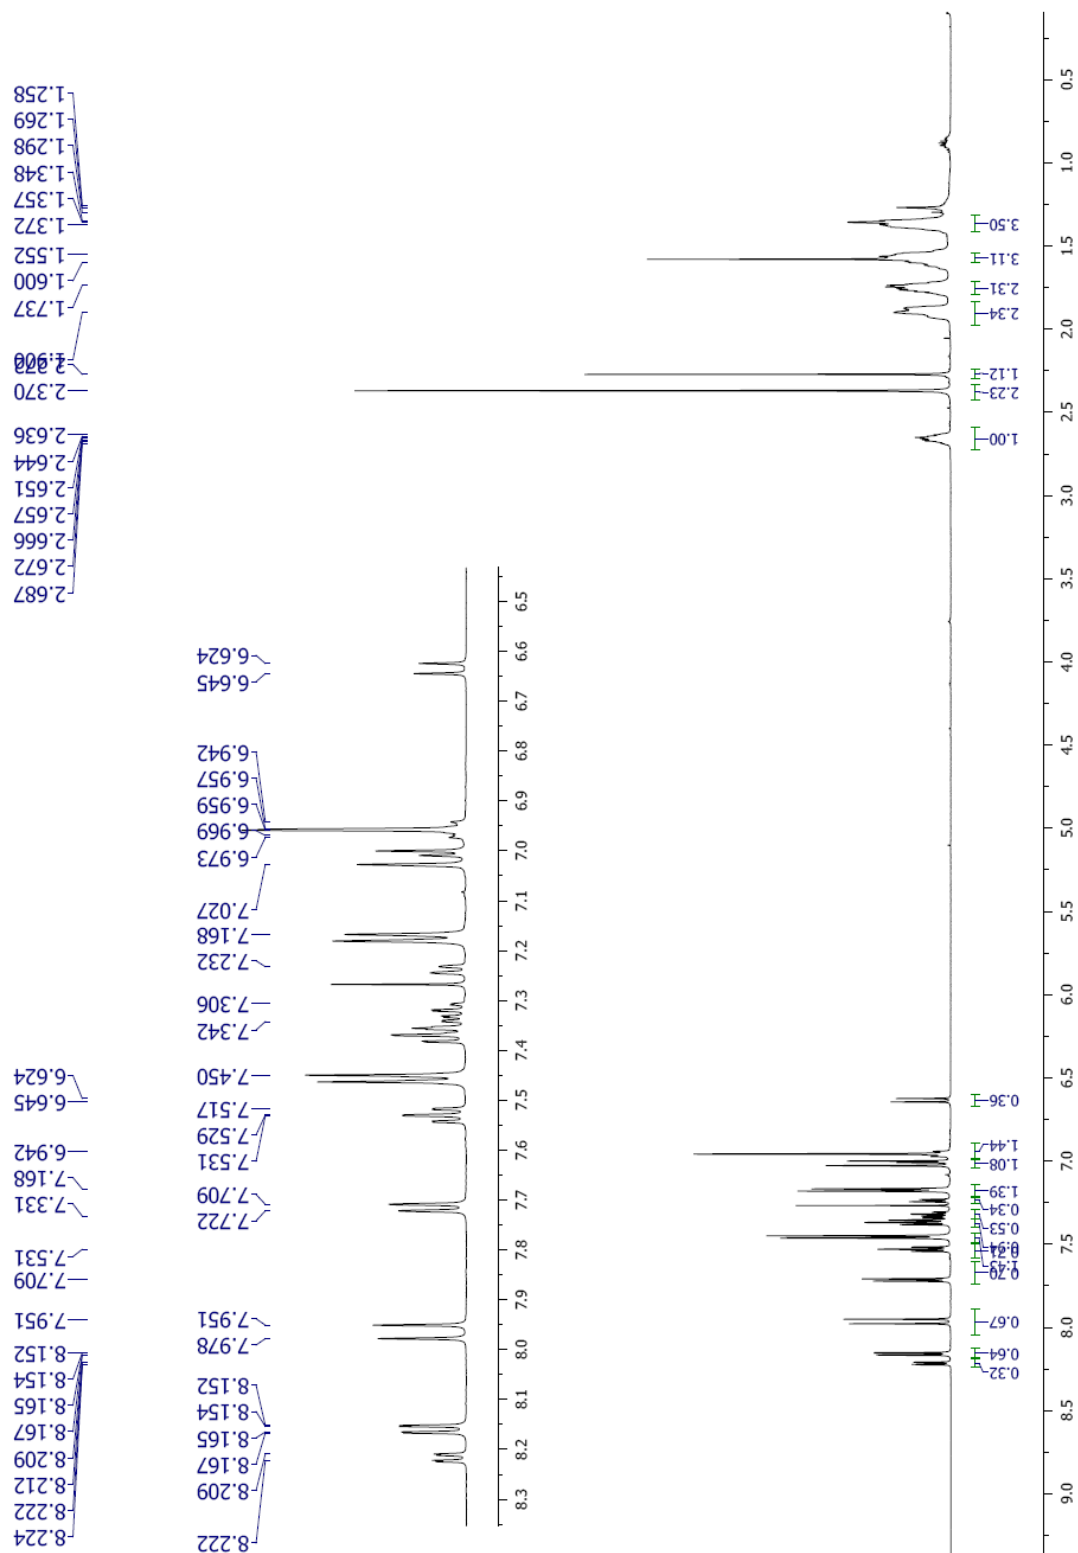

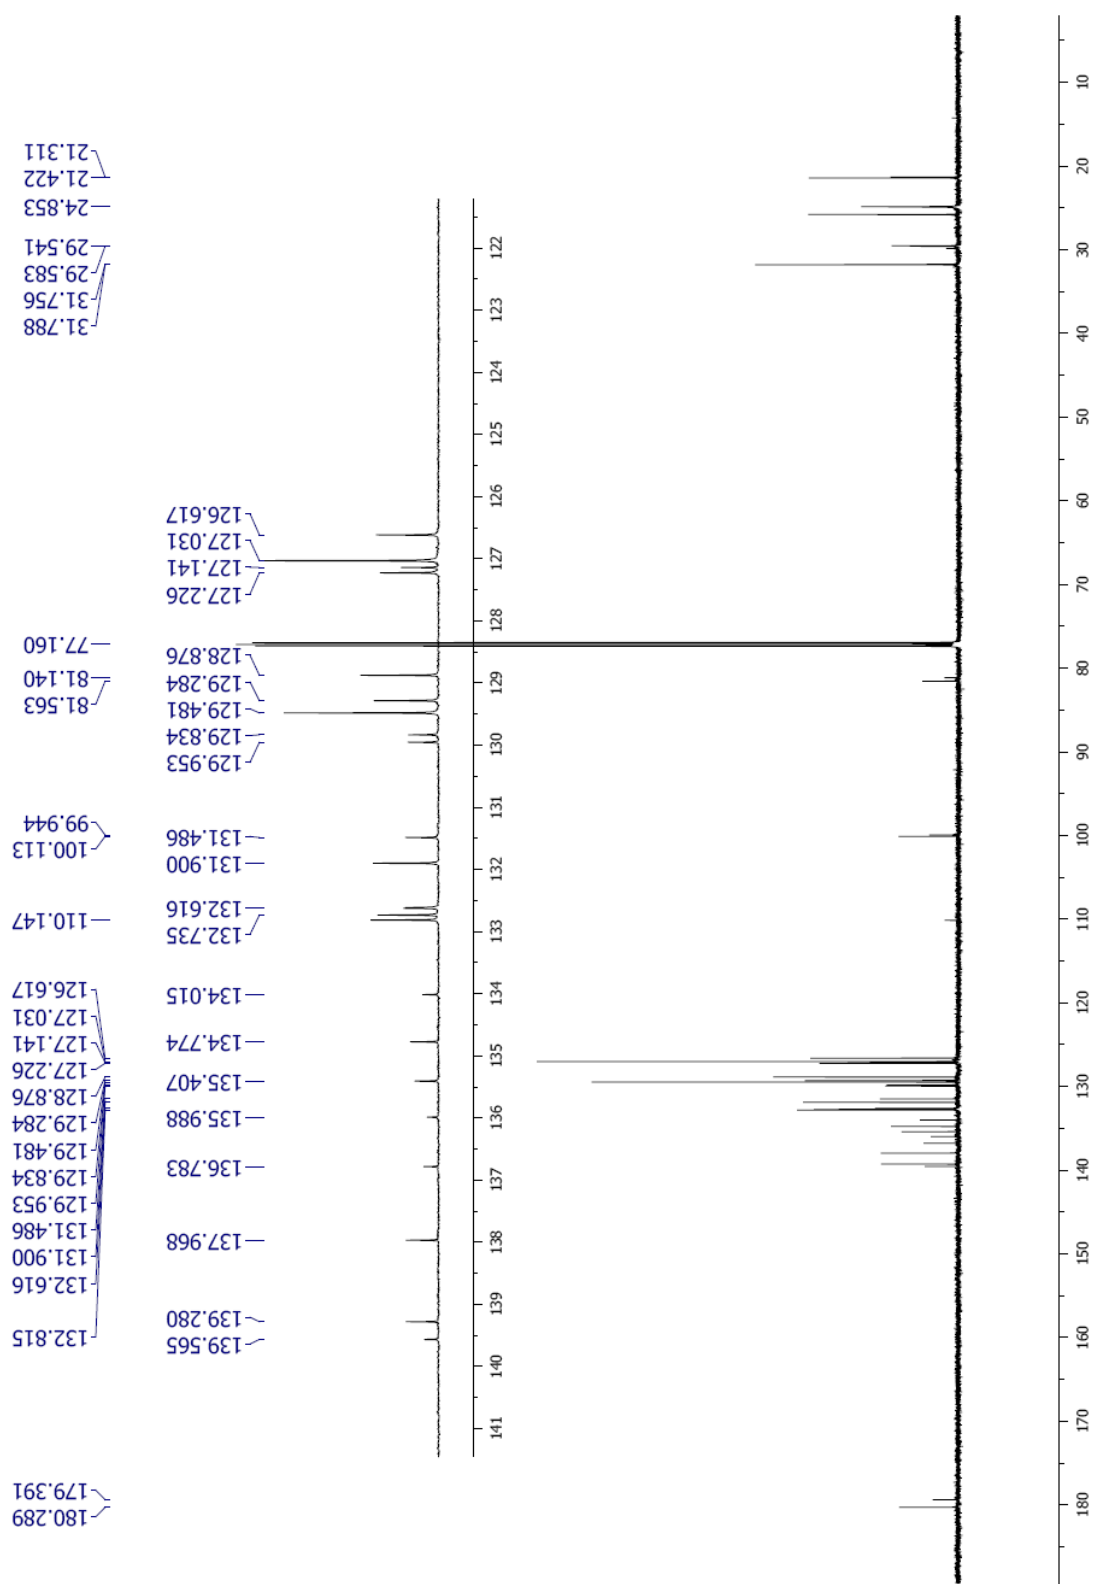

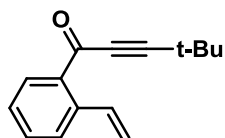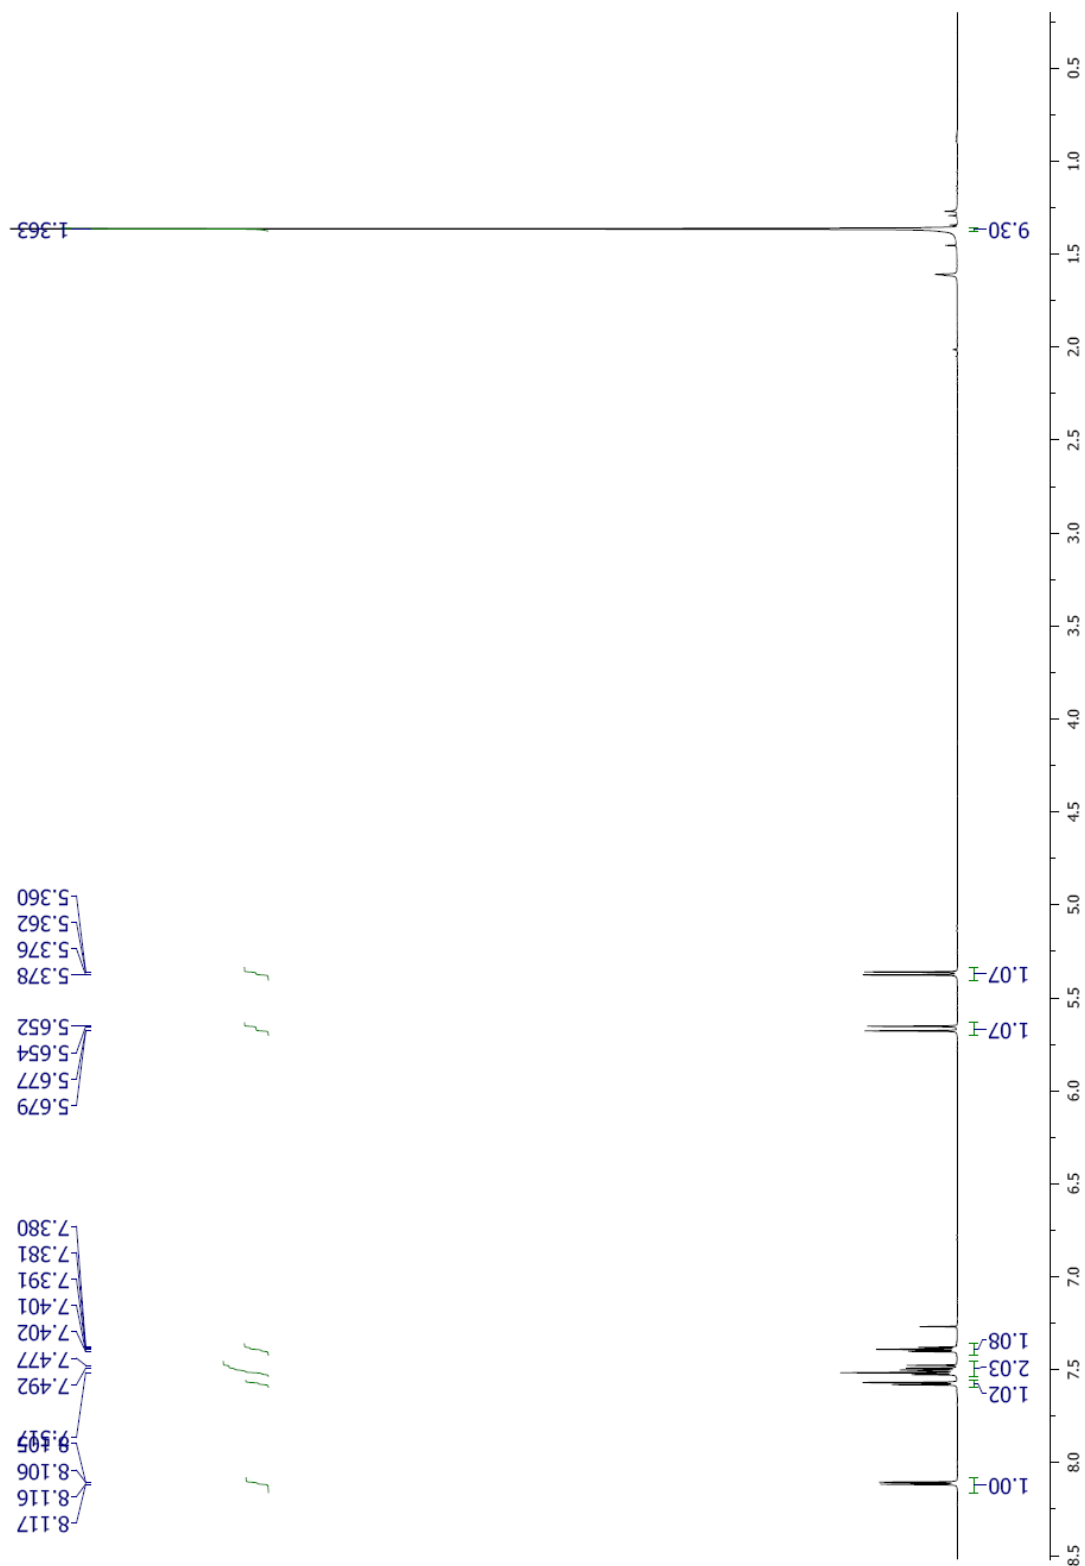



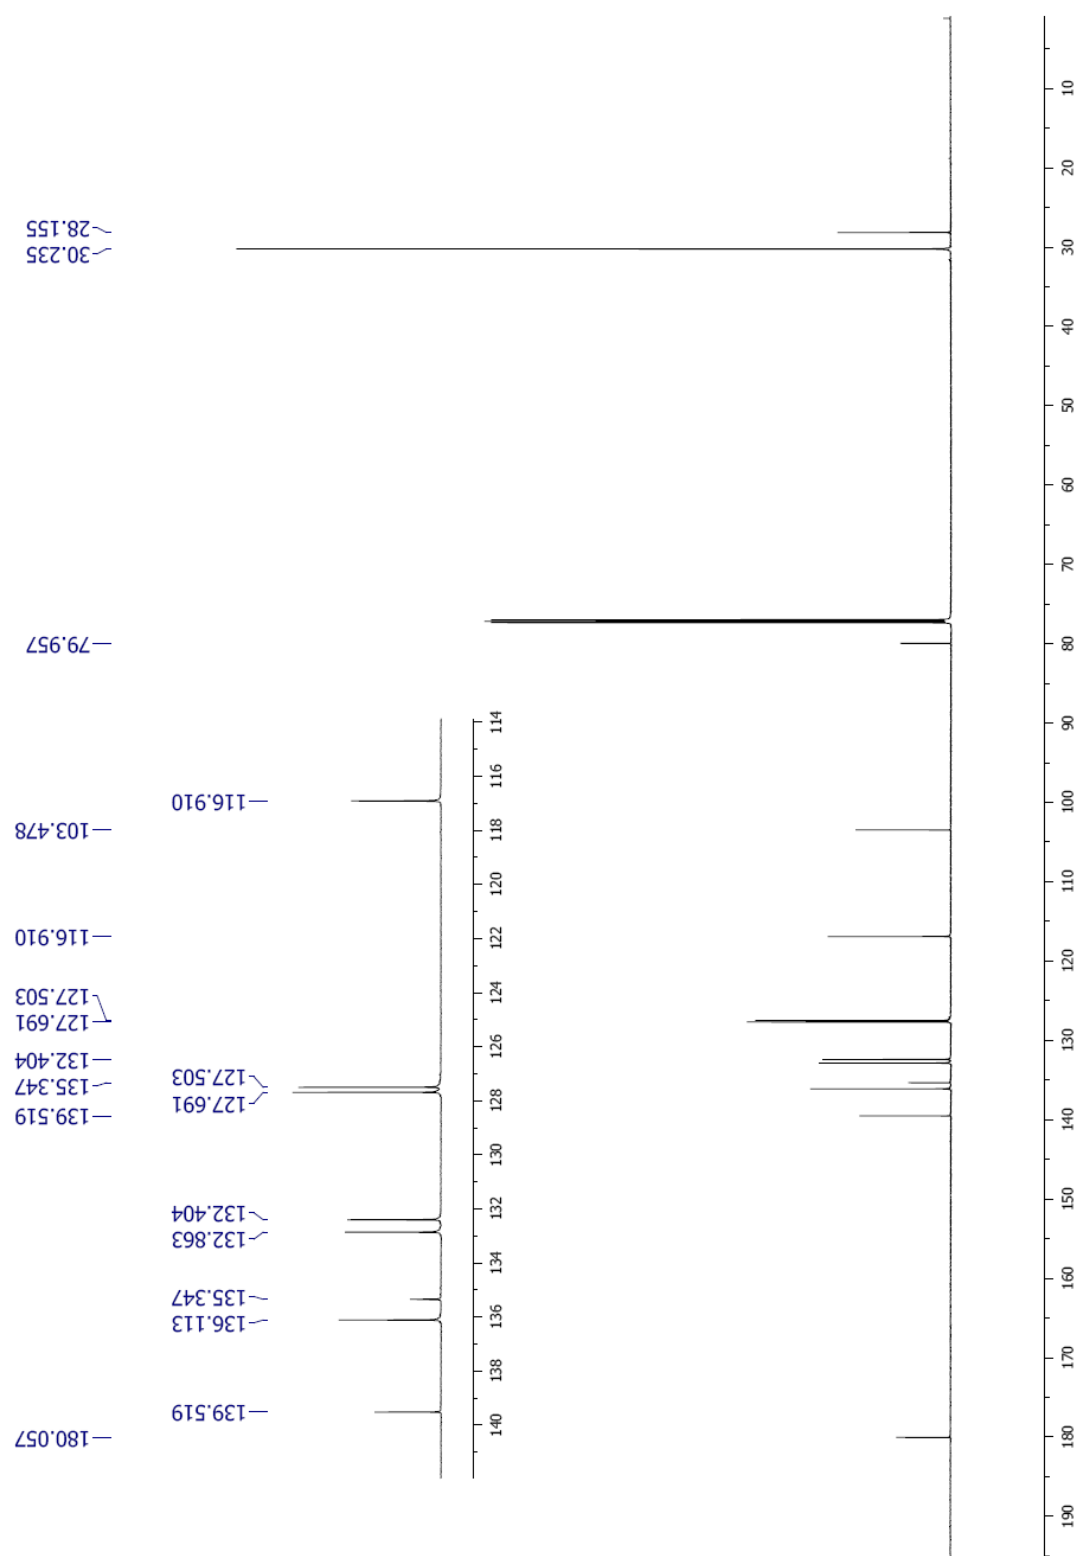

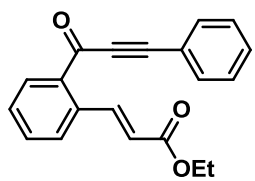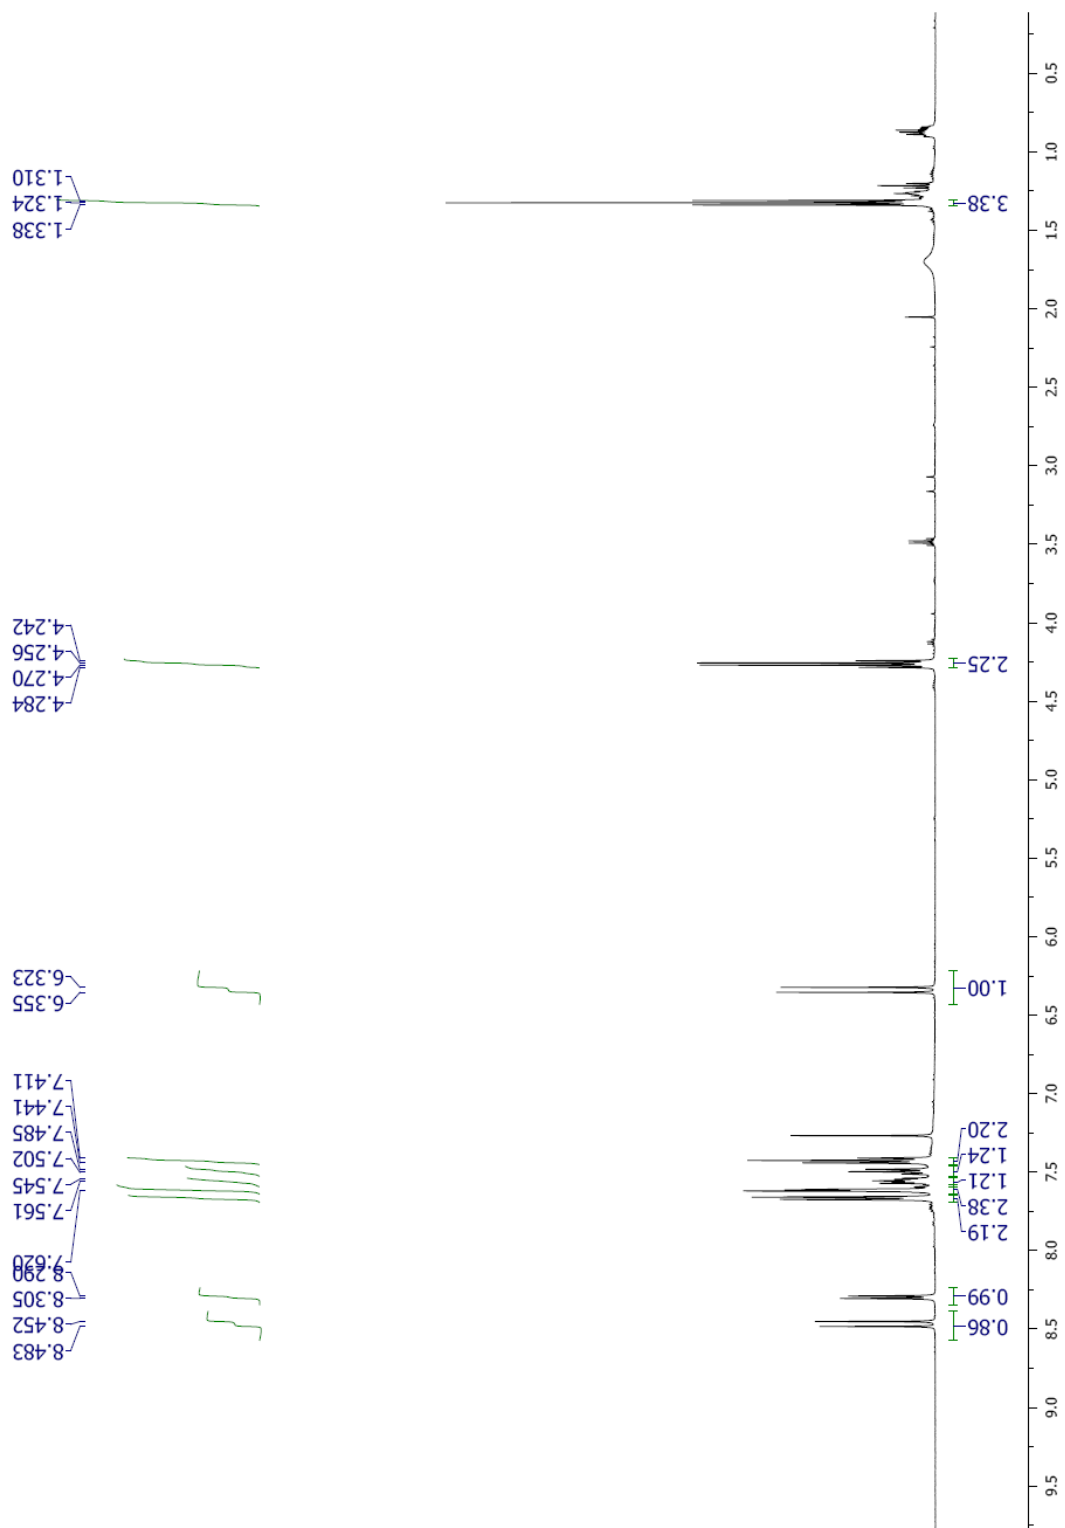

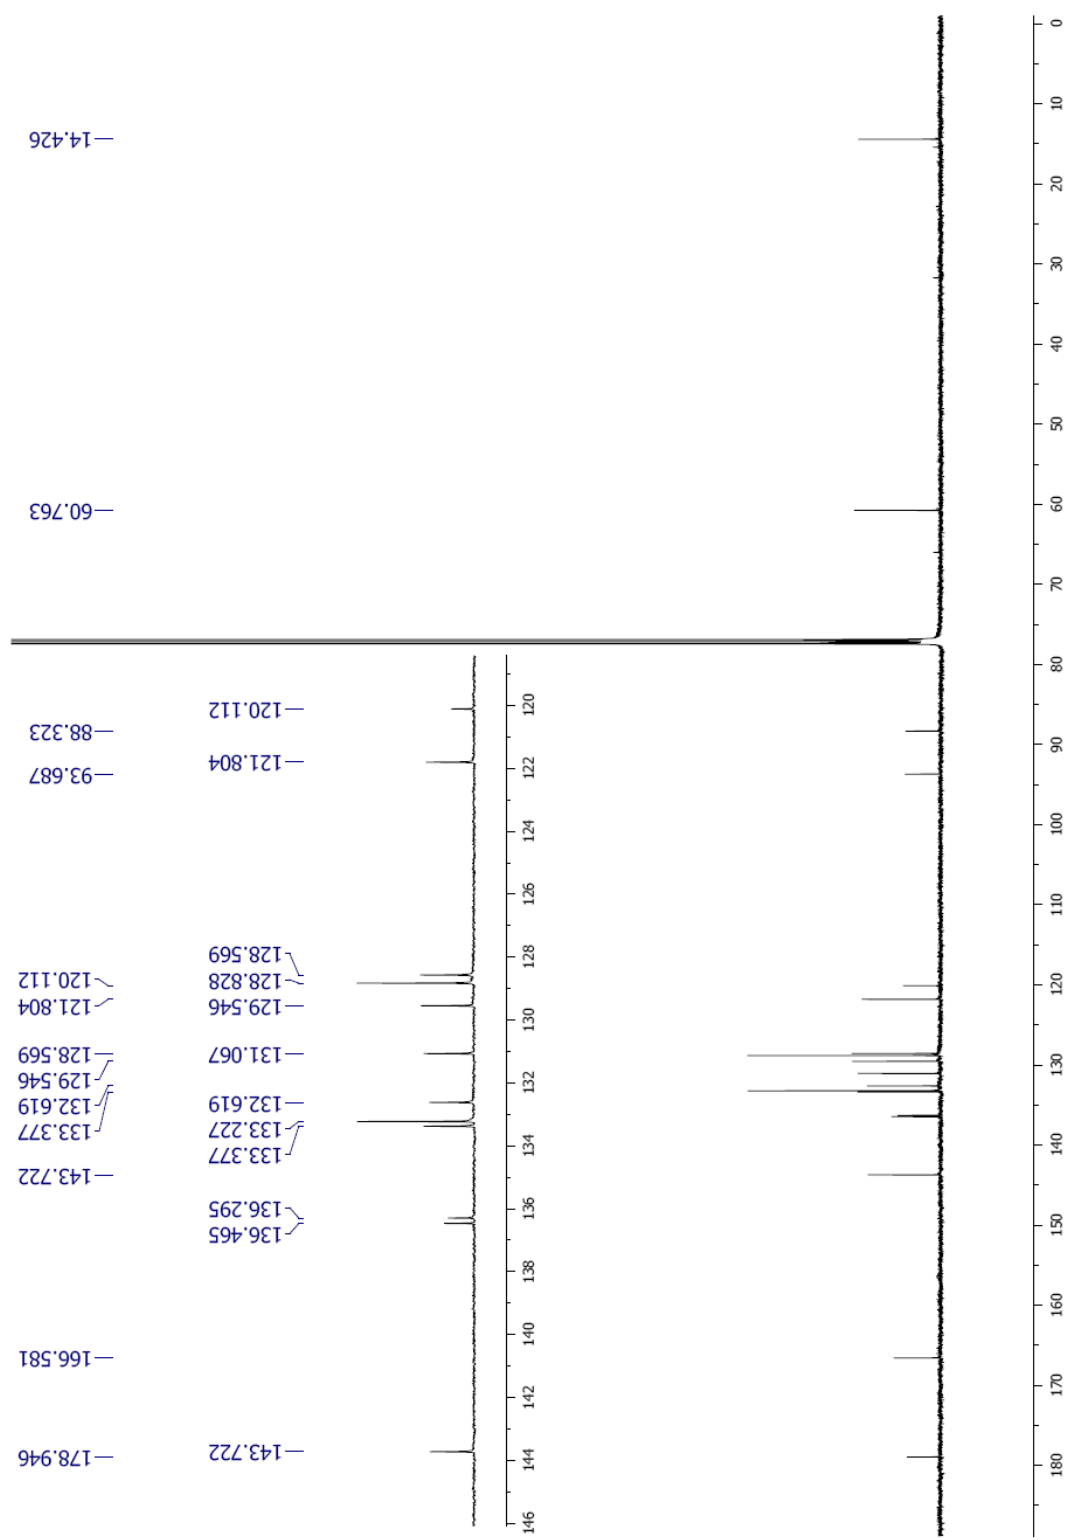

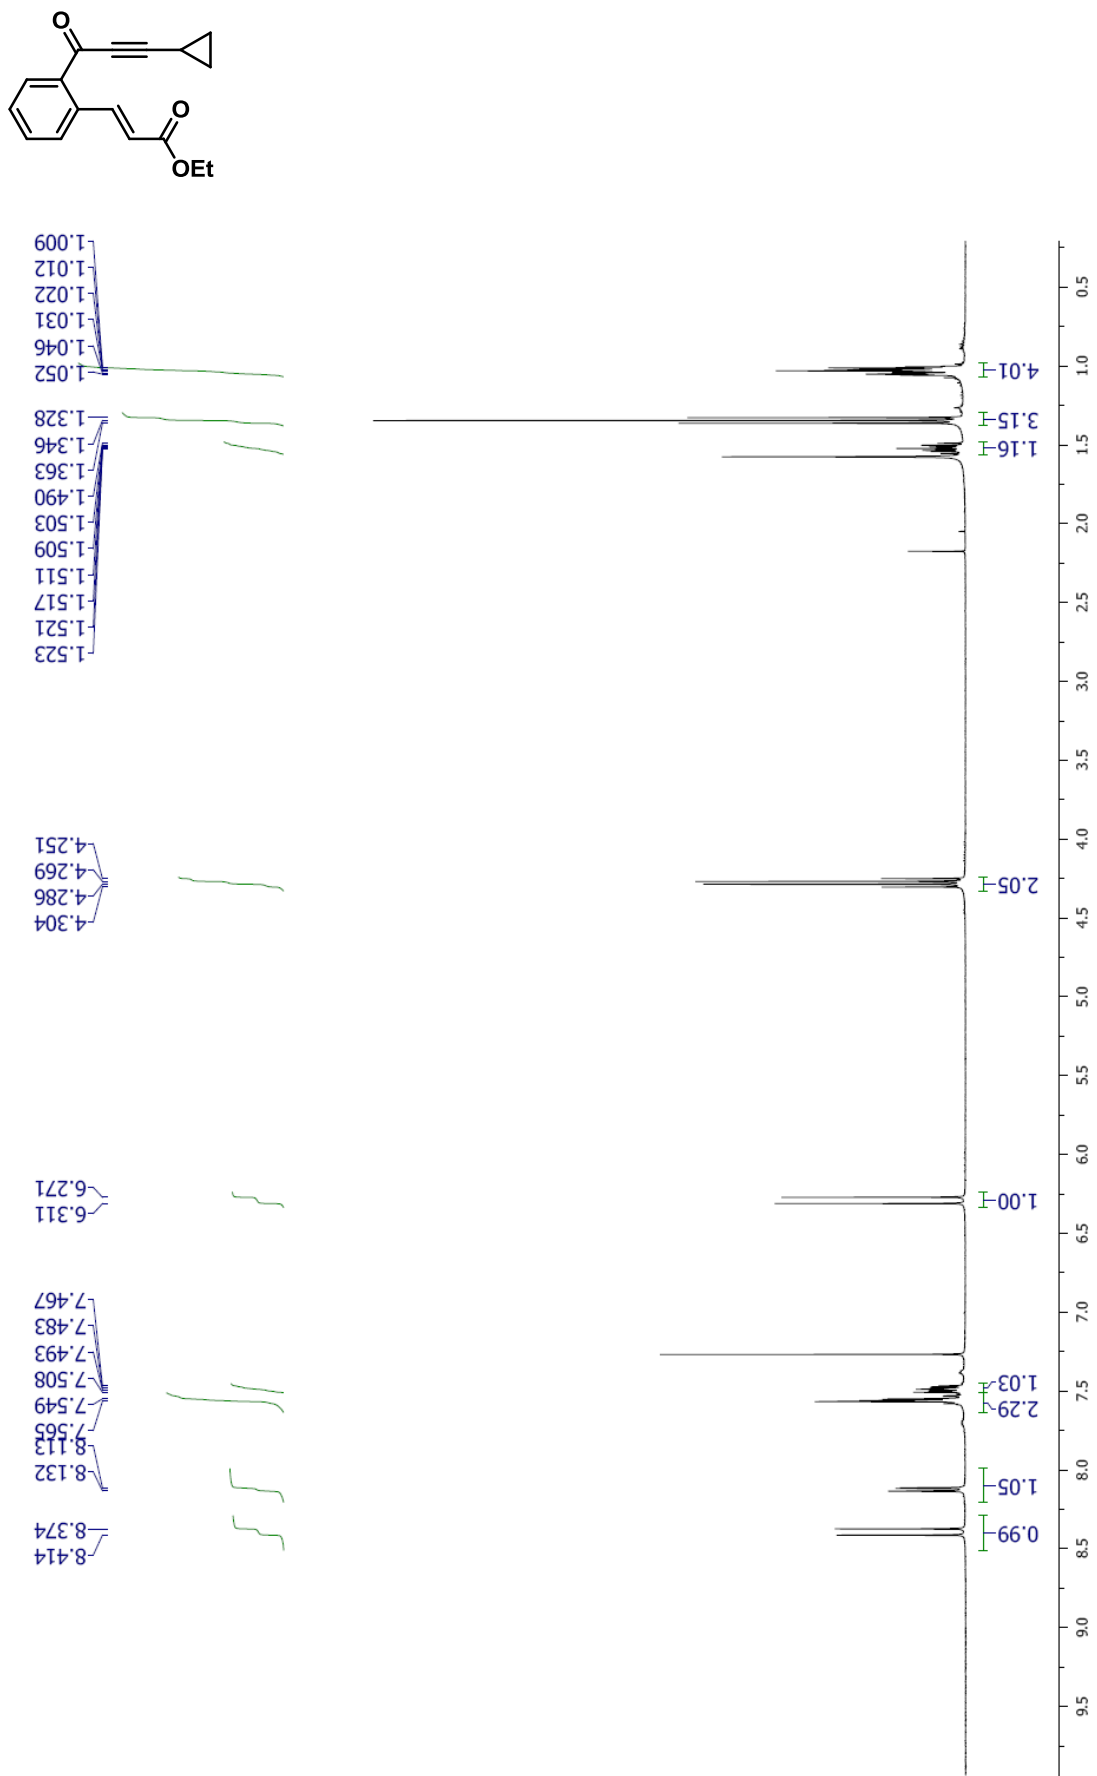

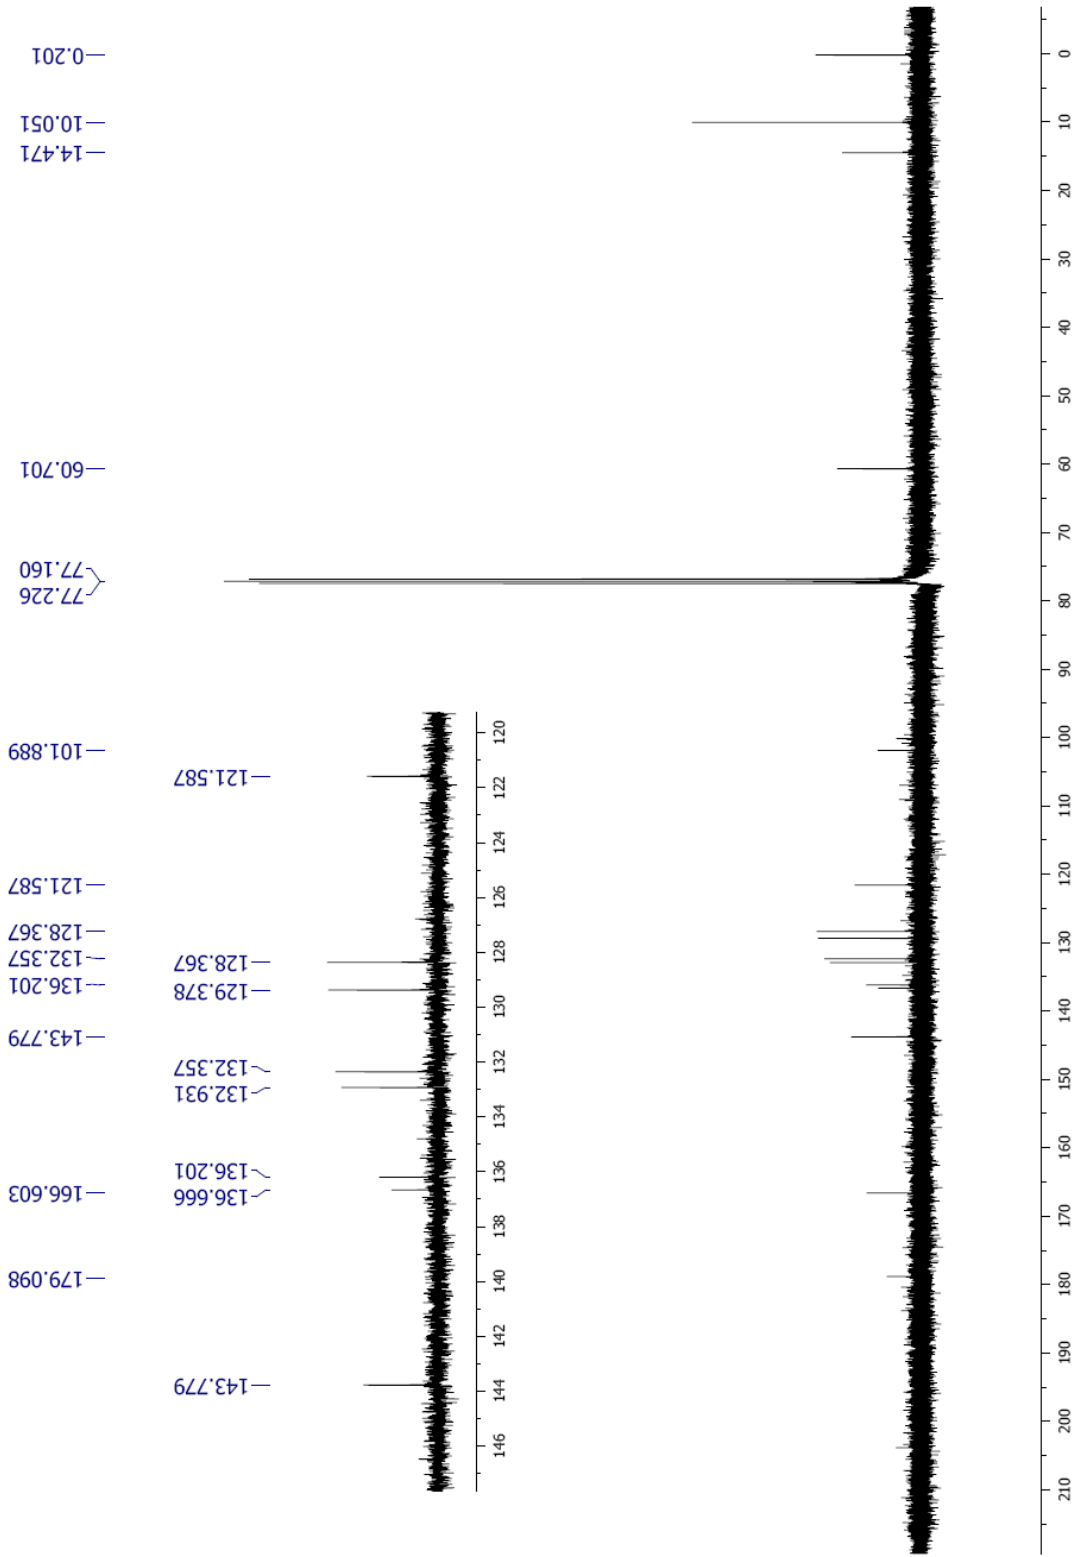

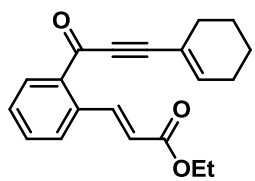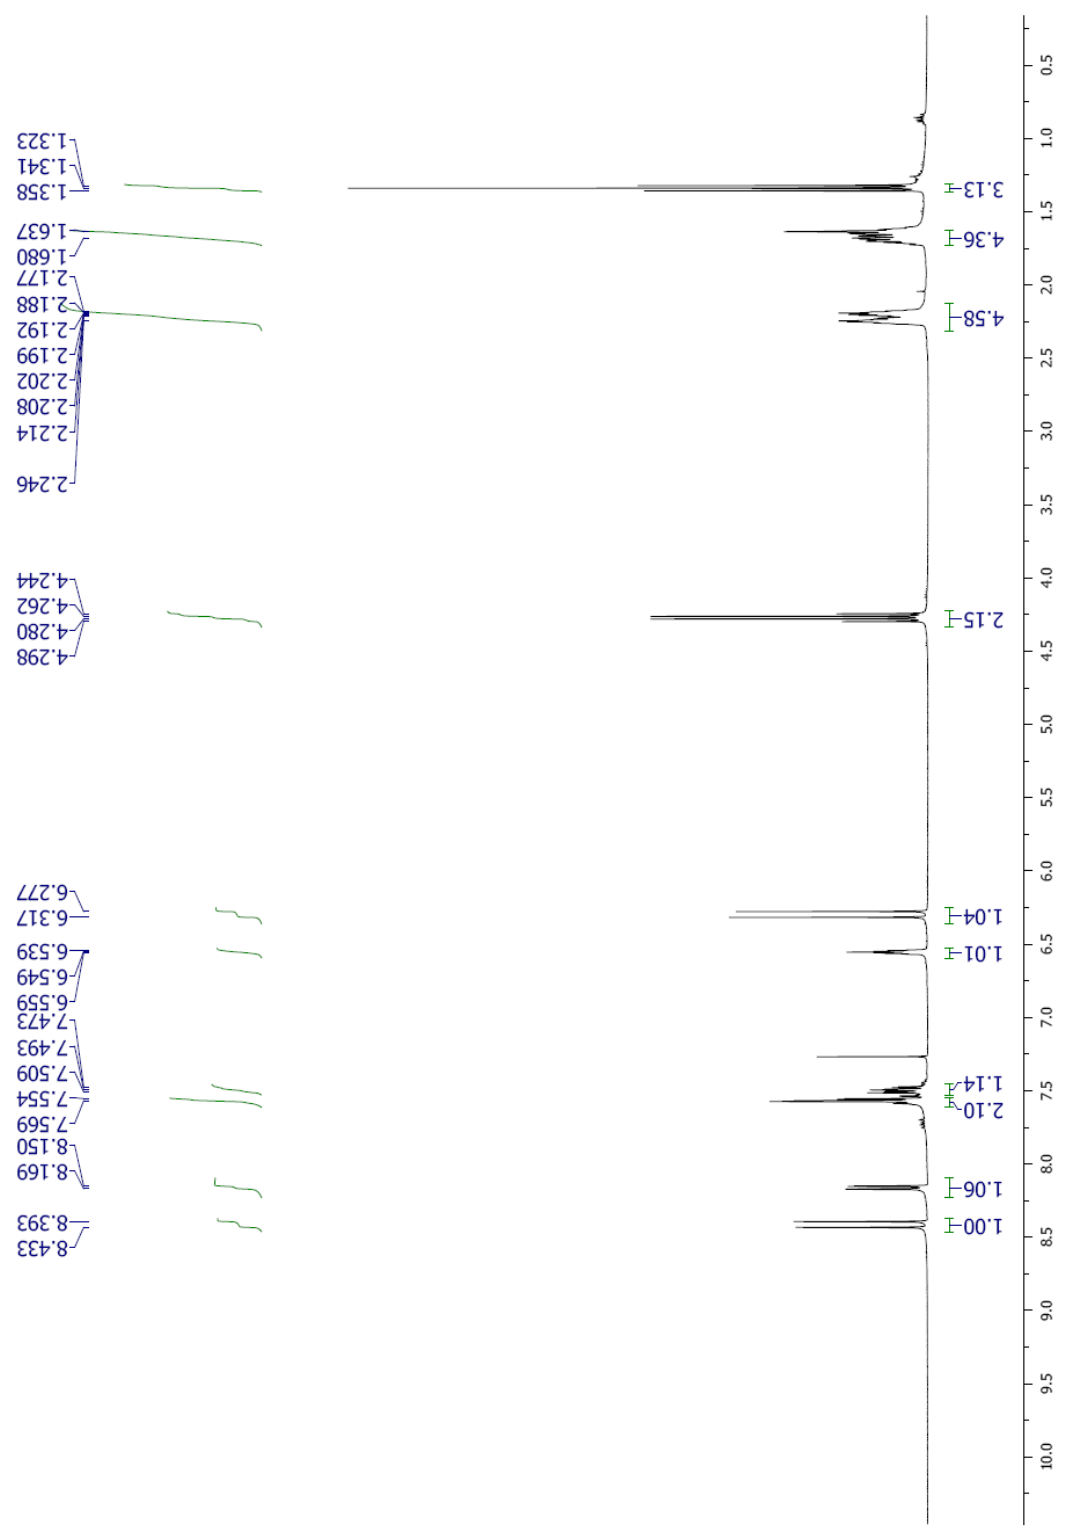

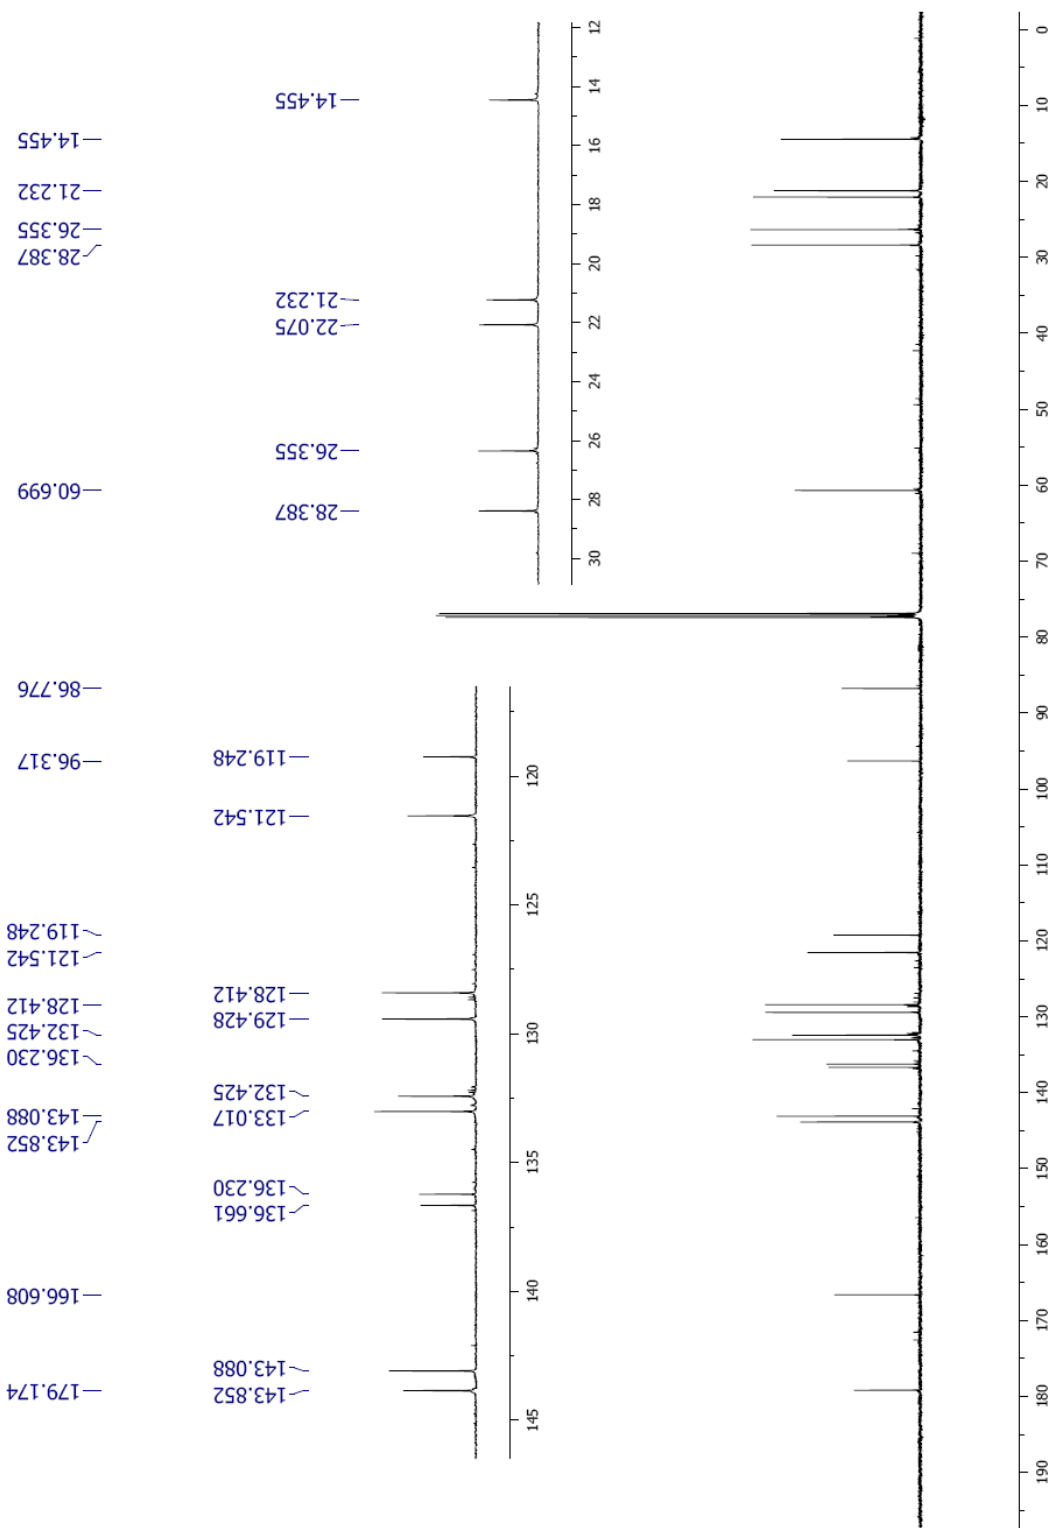

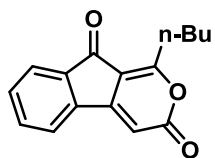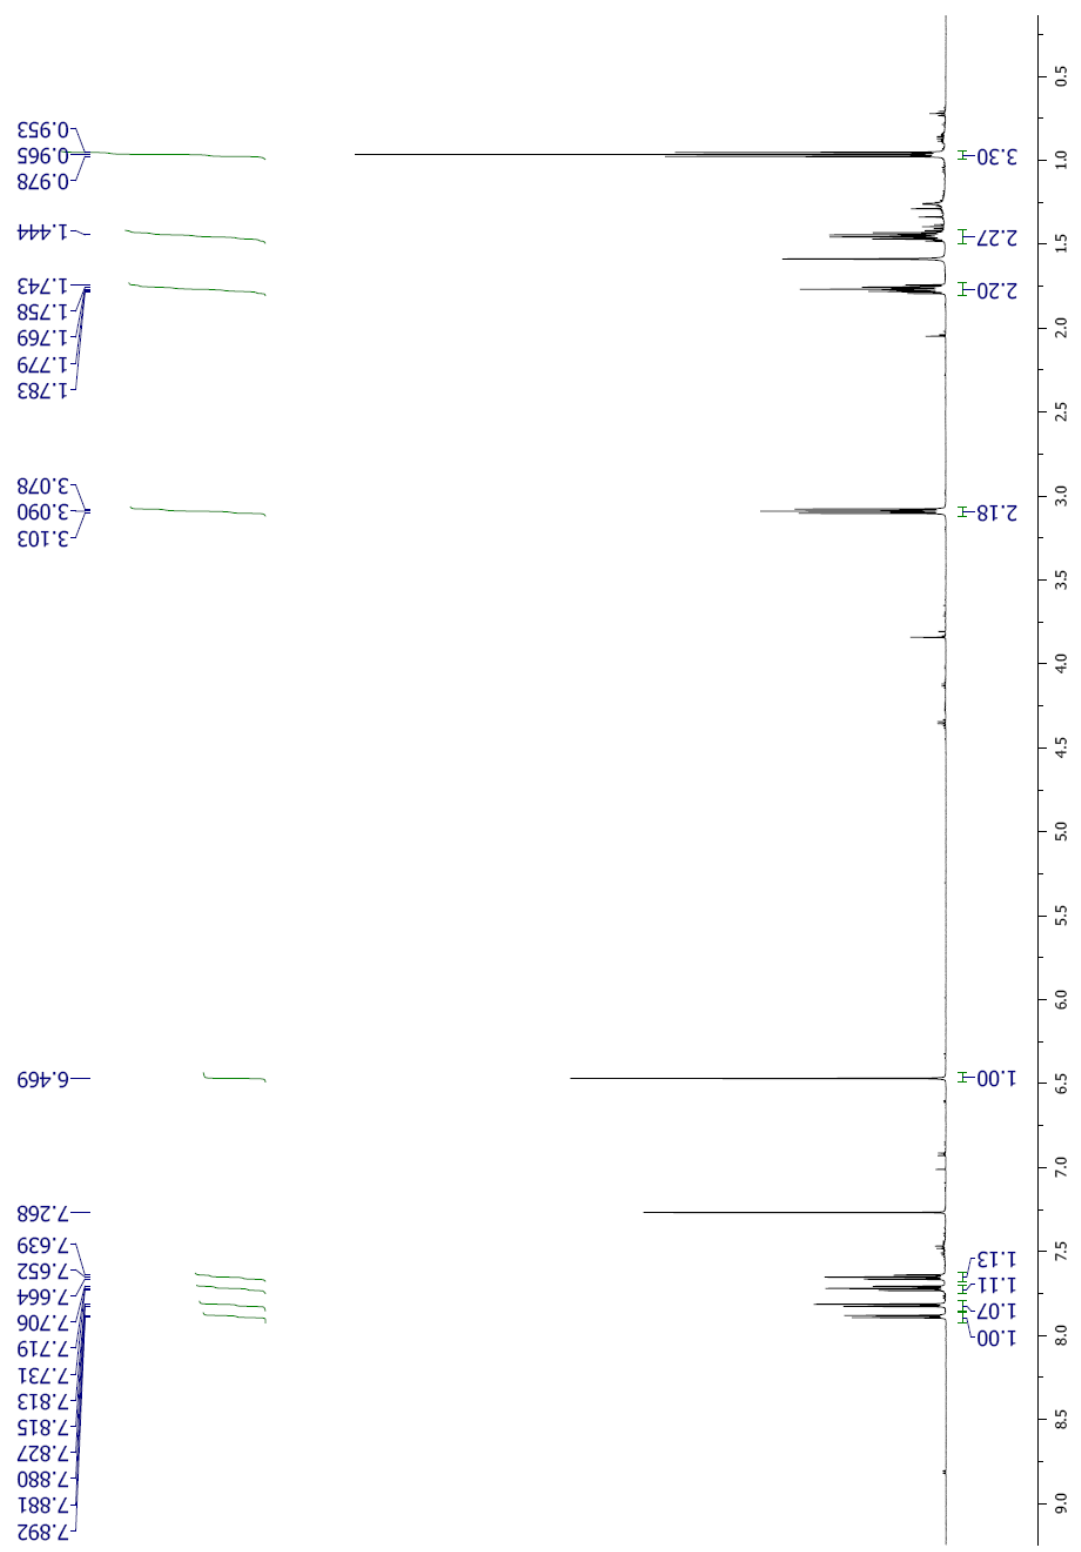



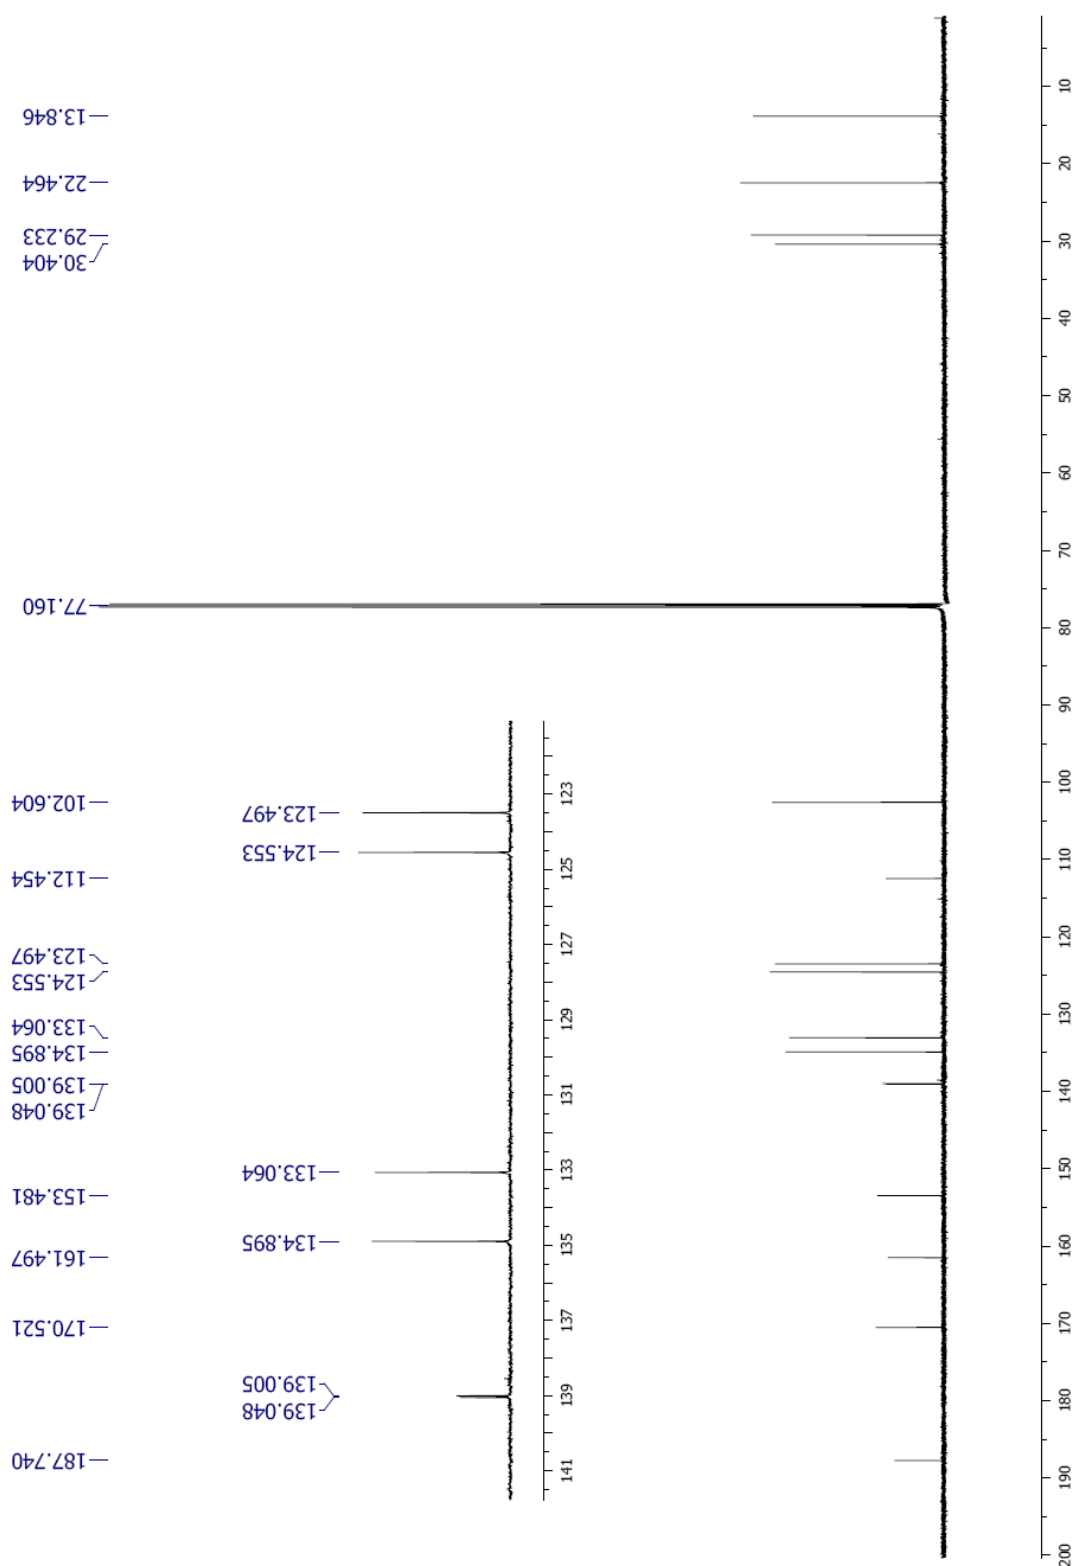

$^1\text{H}$  COSY (400 MHz)

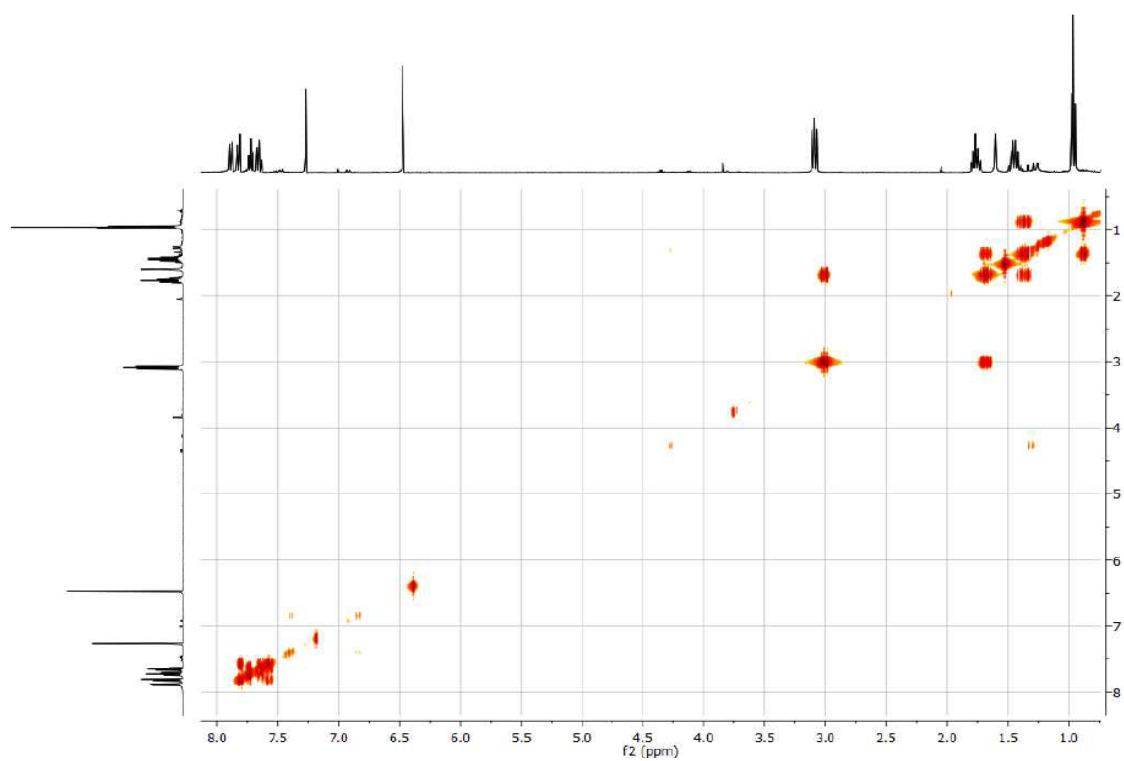

$^1\text{H}$ - $^{13}\text{C}$  HSQC (600 MHz)

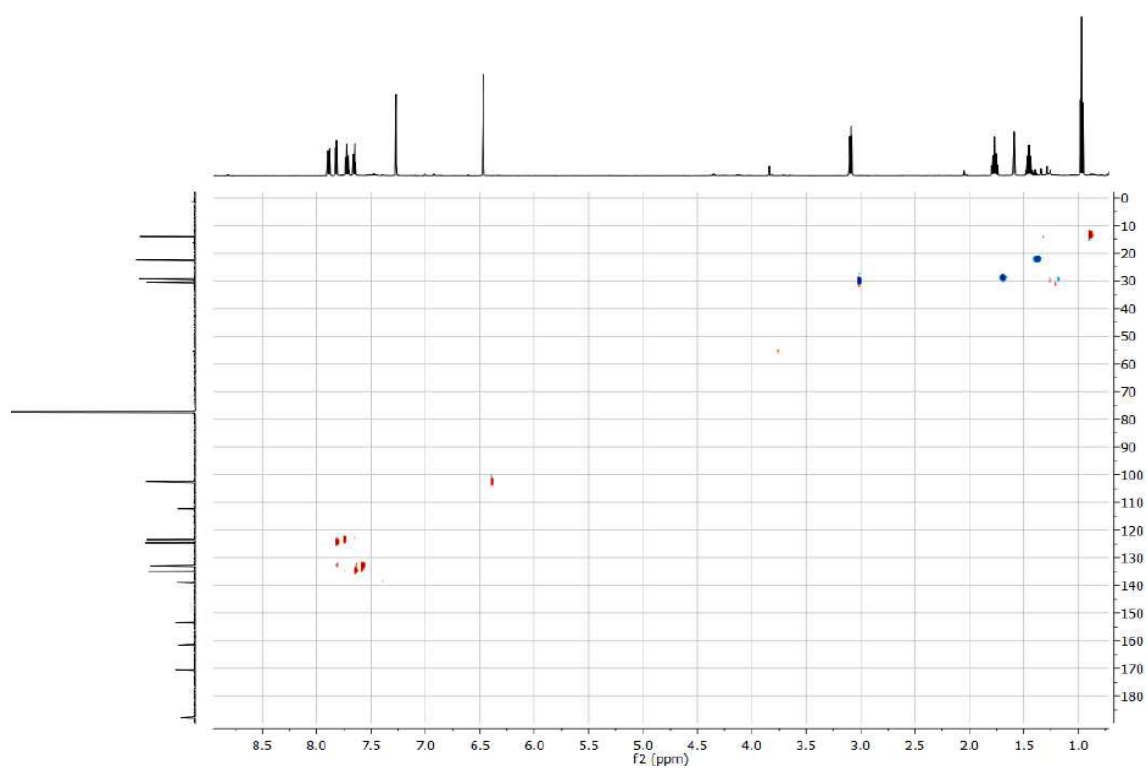

$^1\text{H}$ - $^{13}\text{C}$  HMBC (600 MHz)

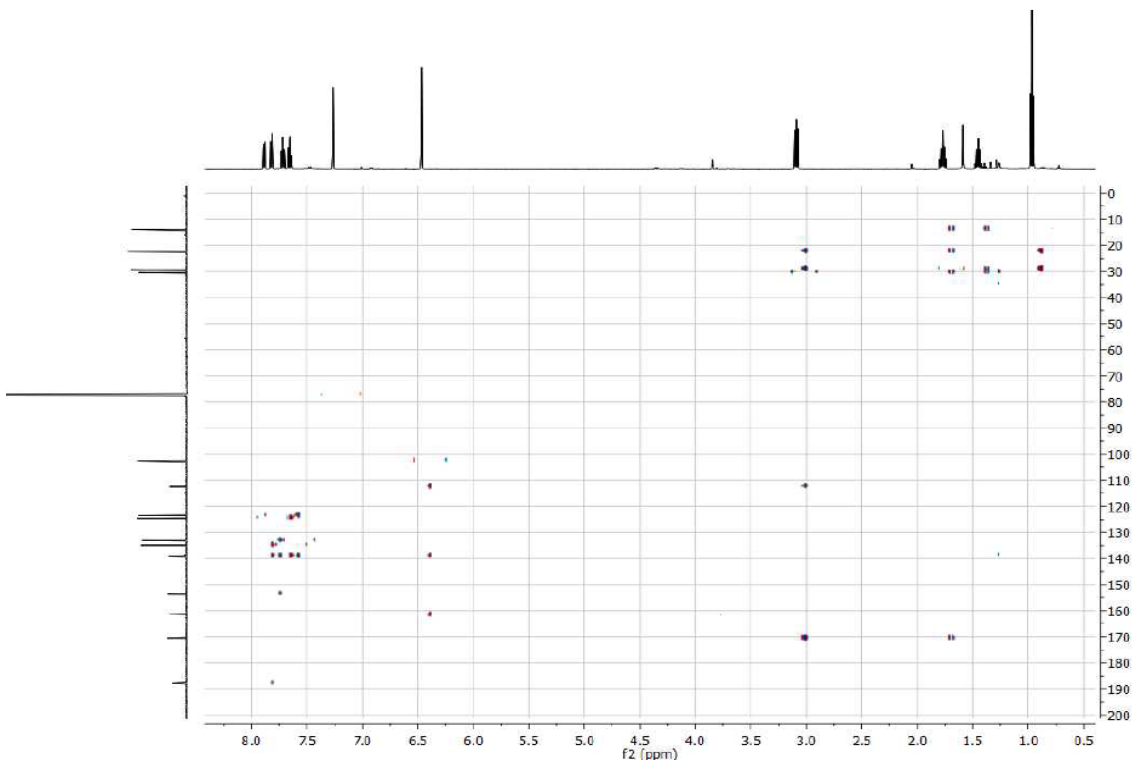

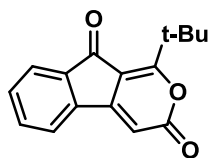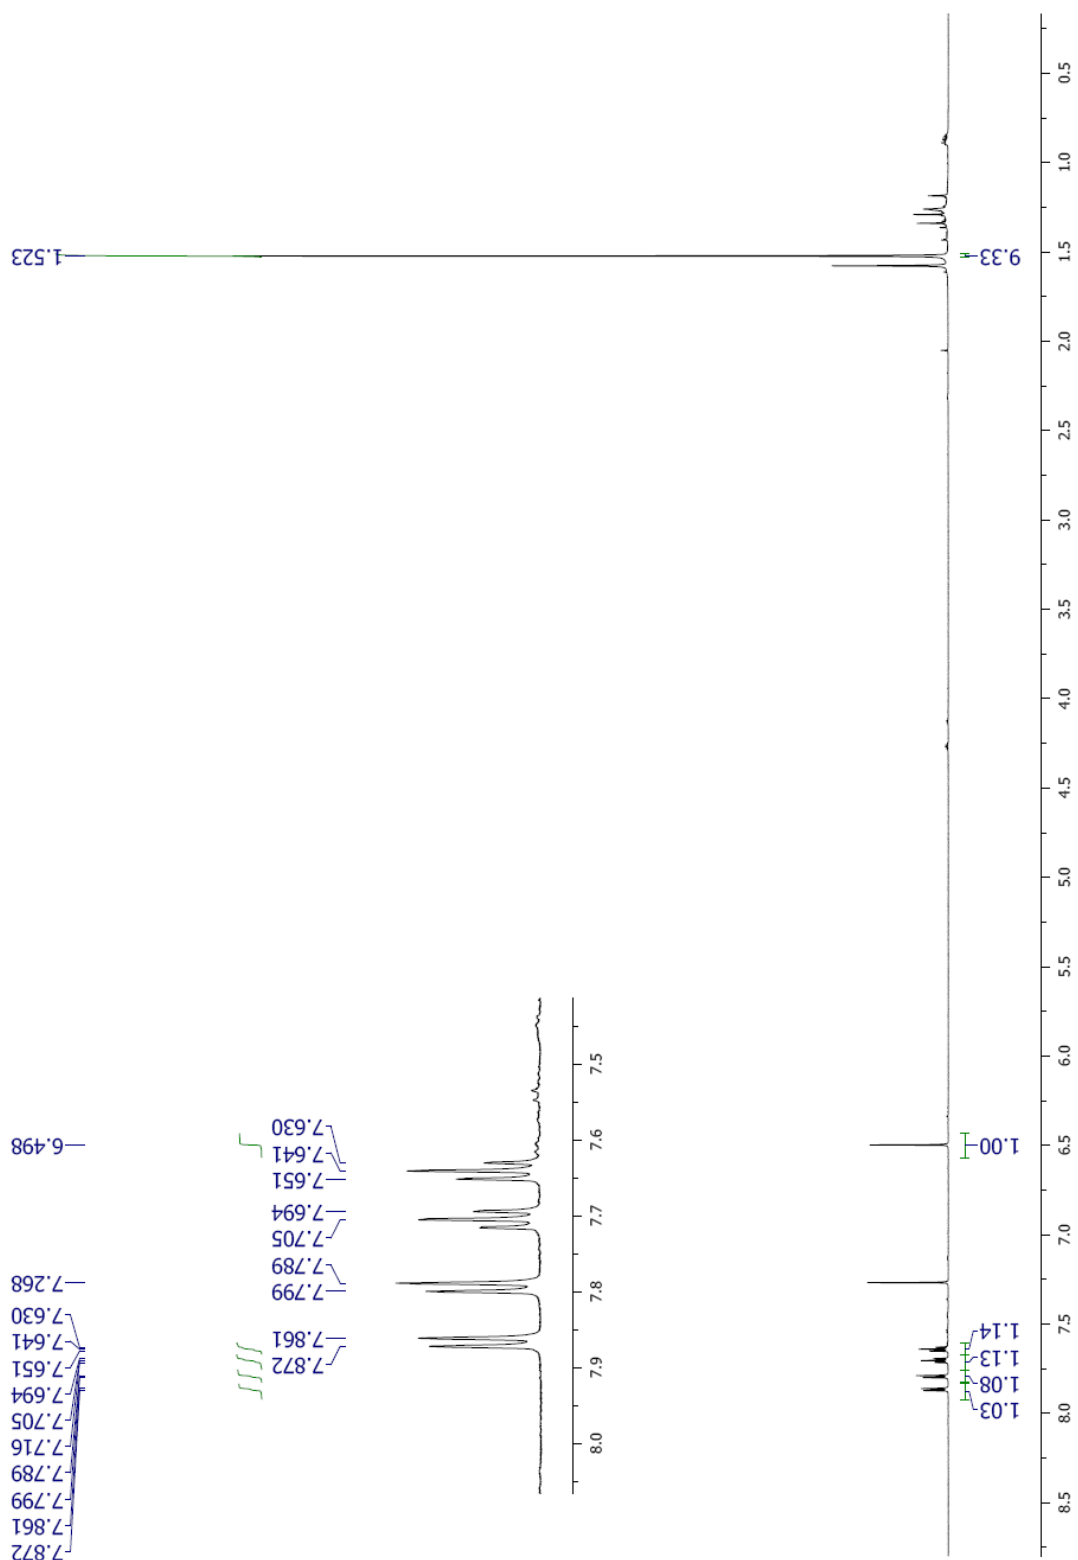

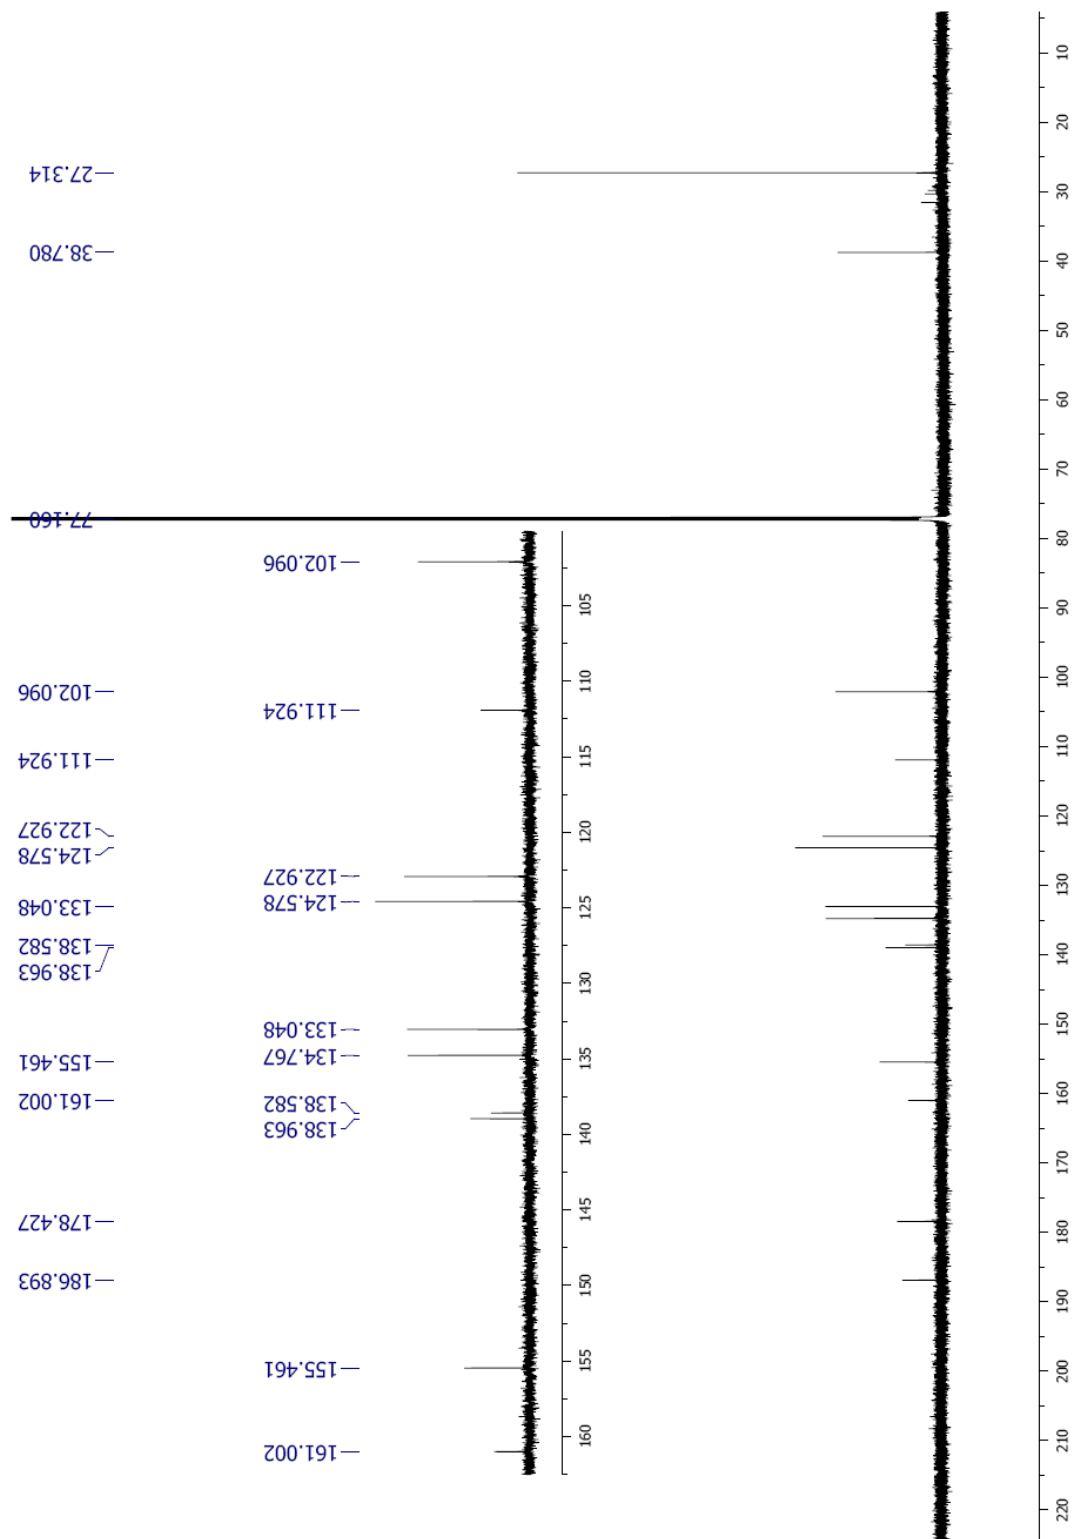

$^1\text{H}$  COSY (700 MHz)

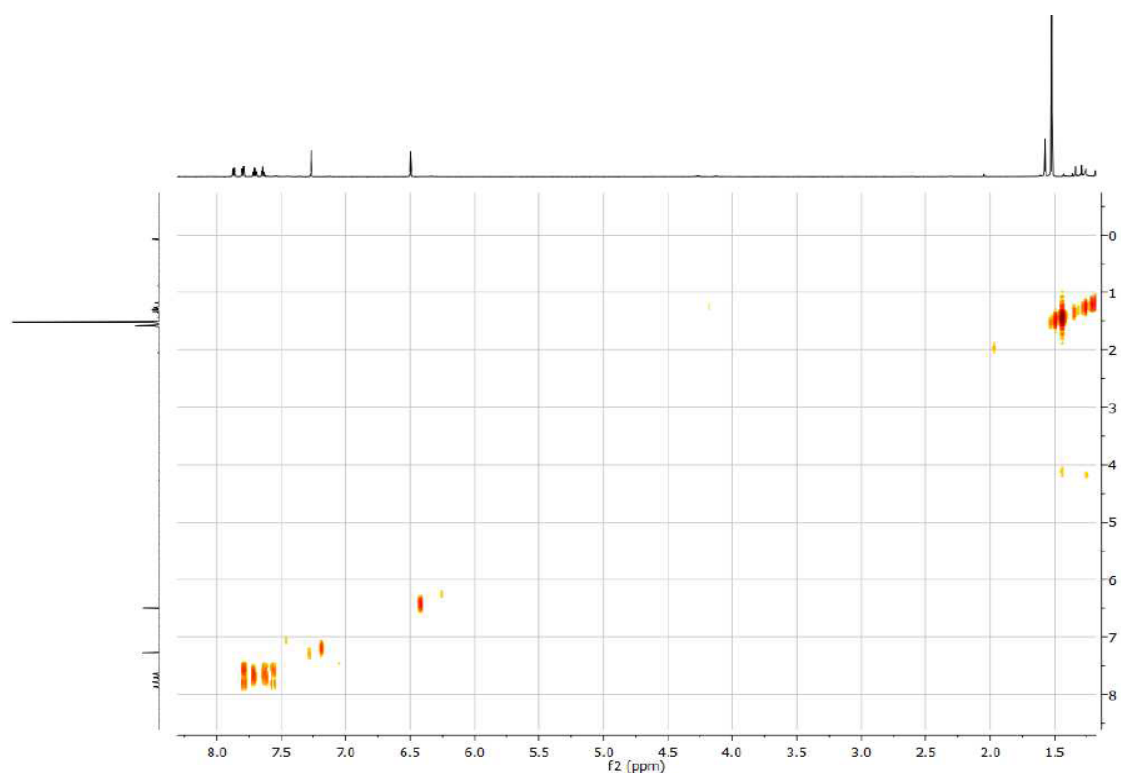

$^1\text{H}$ - $^{13}\text{C}$  HSQC (700 MHz)

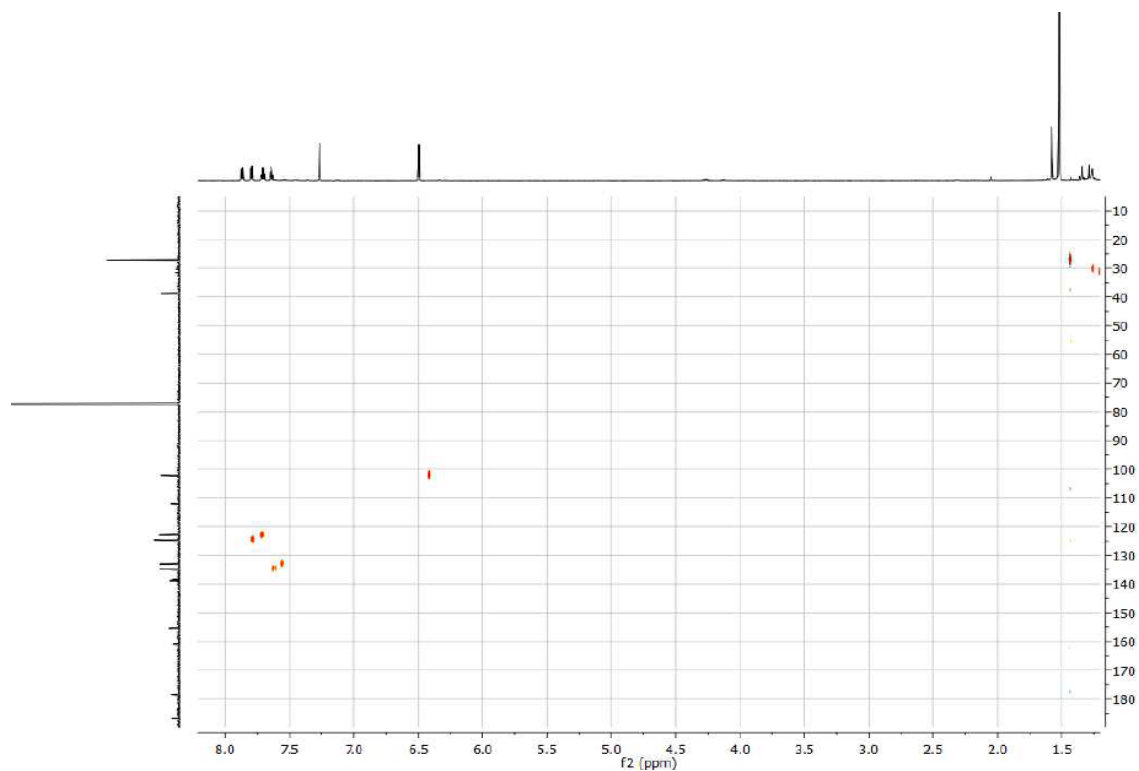

$^1\text{H}$ - $^{13}\text{C}$  HMBC (700 MHz)

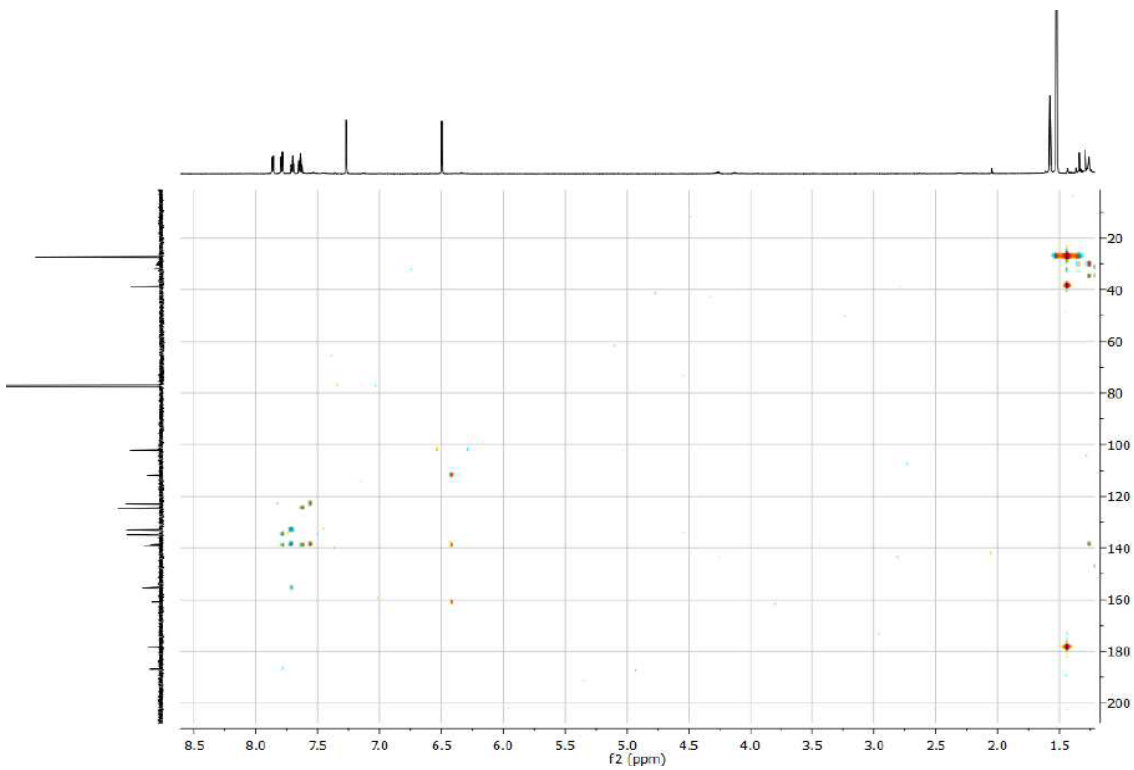

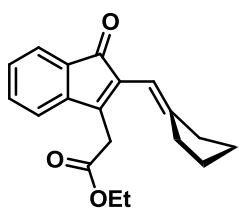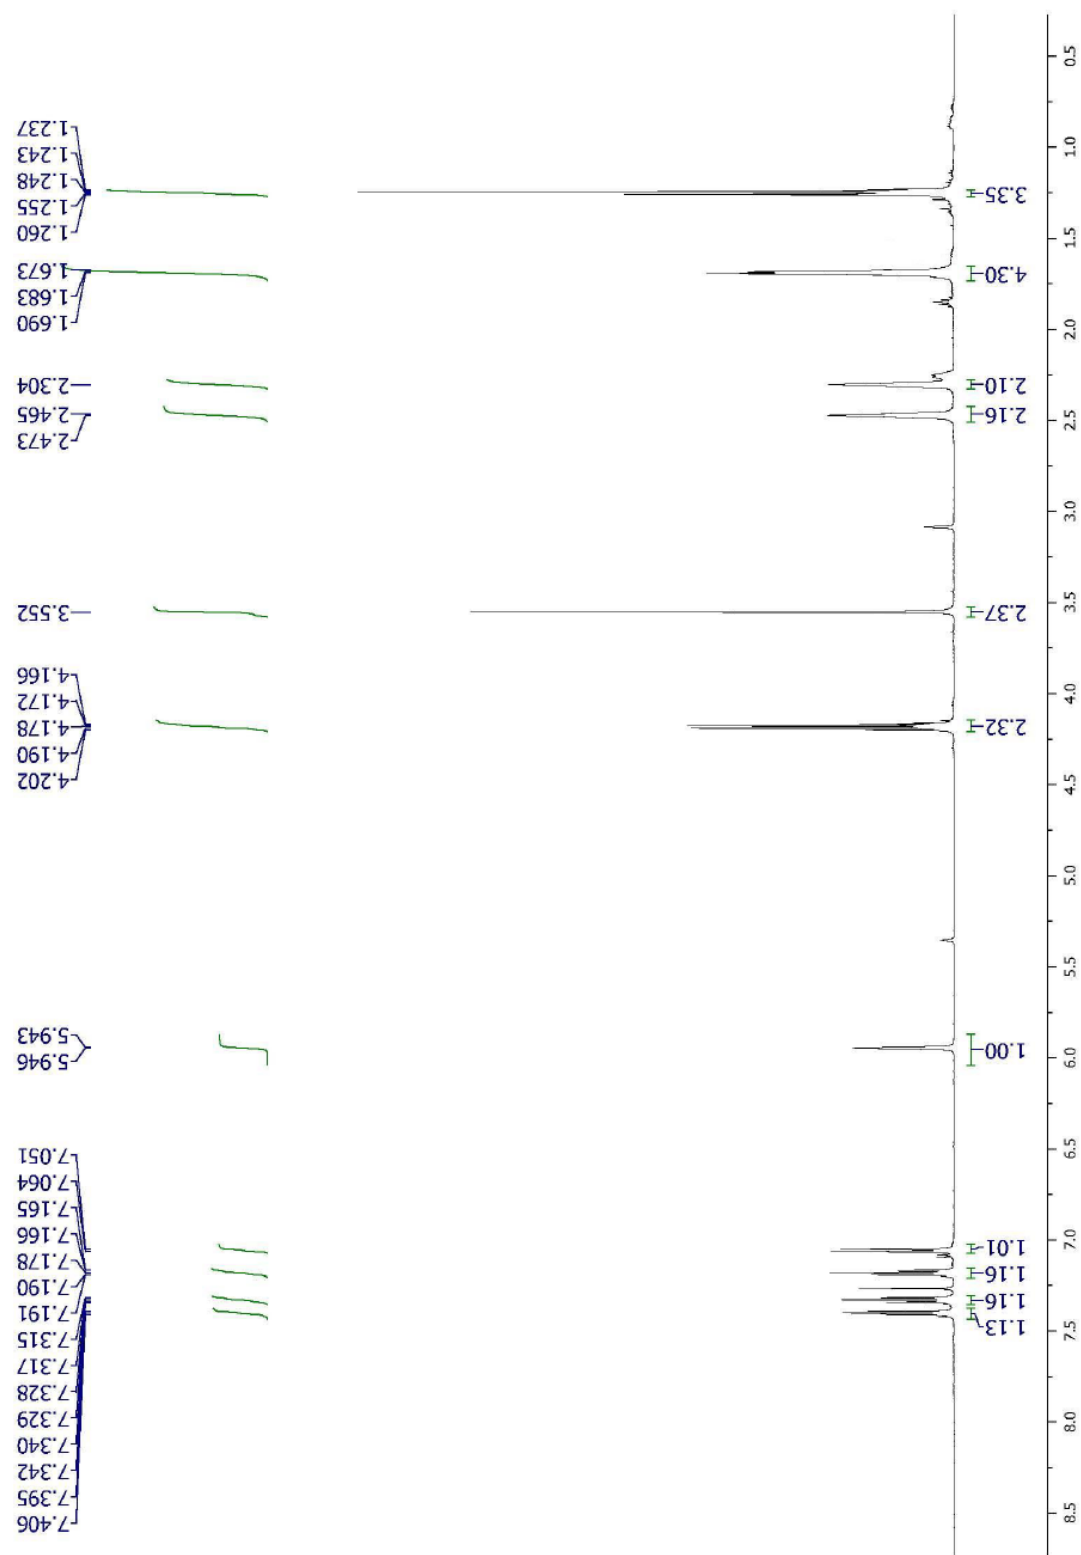



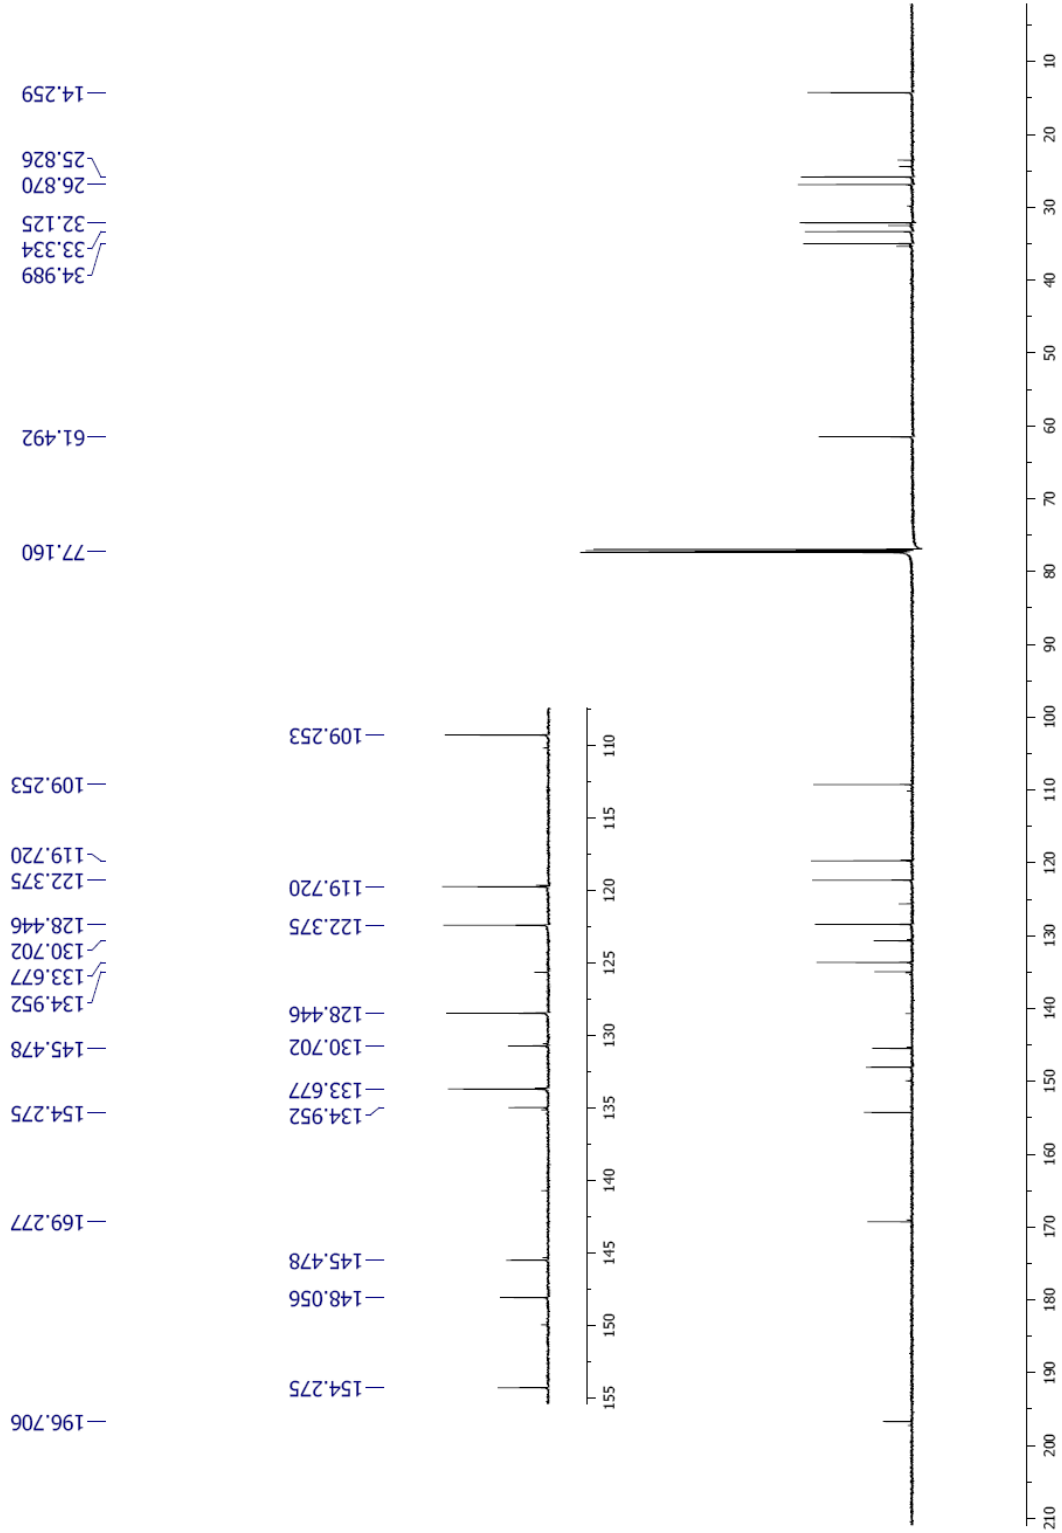

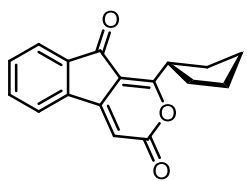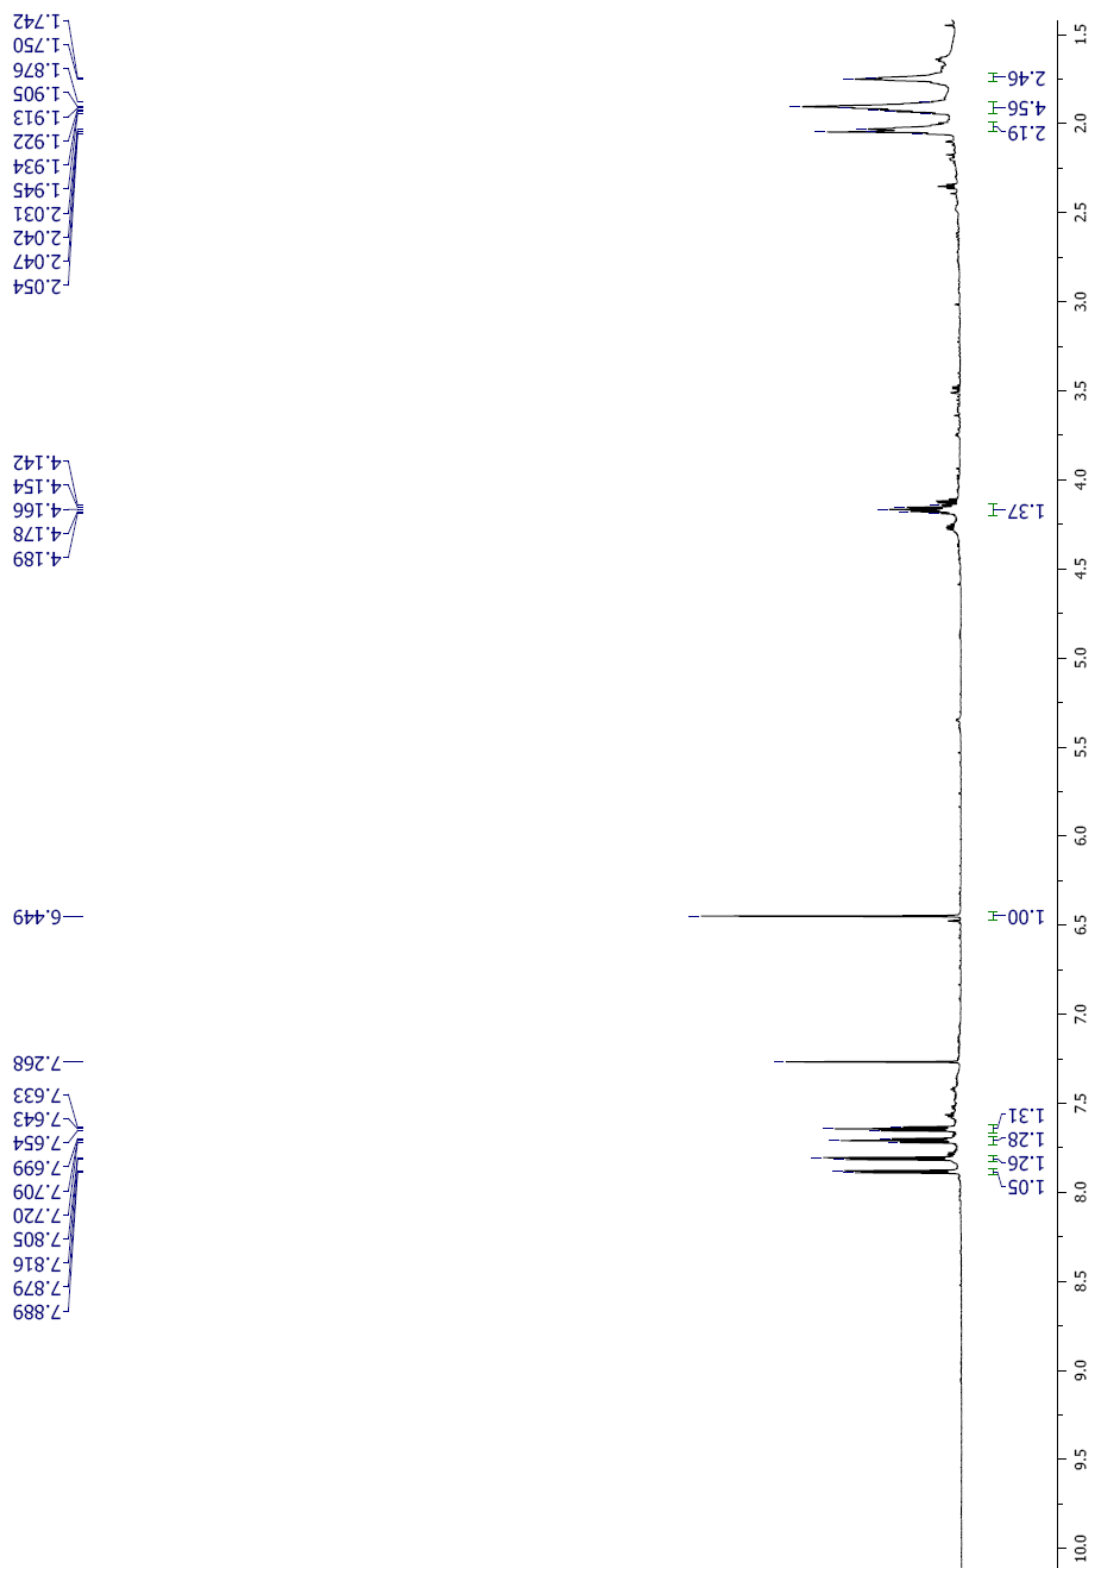

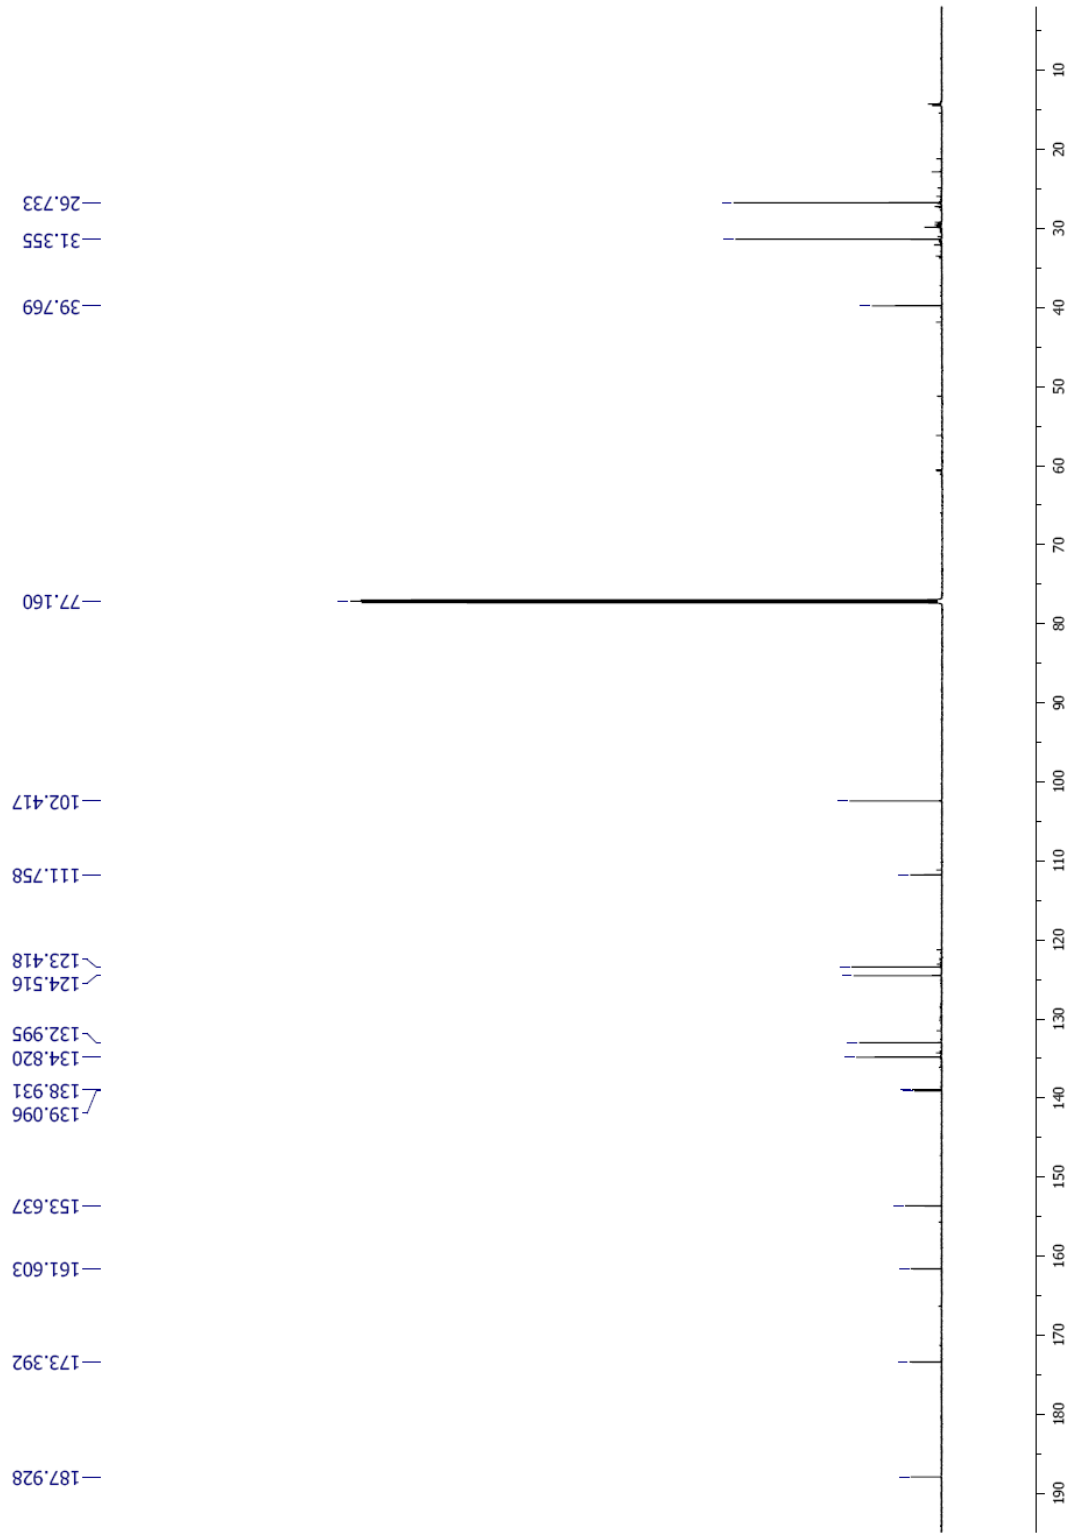

$^1\text{H}$  COSY (700 MHz)

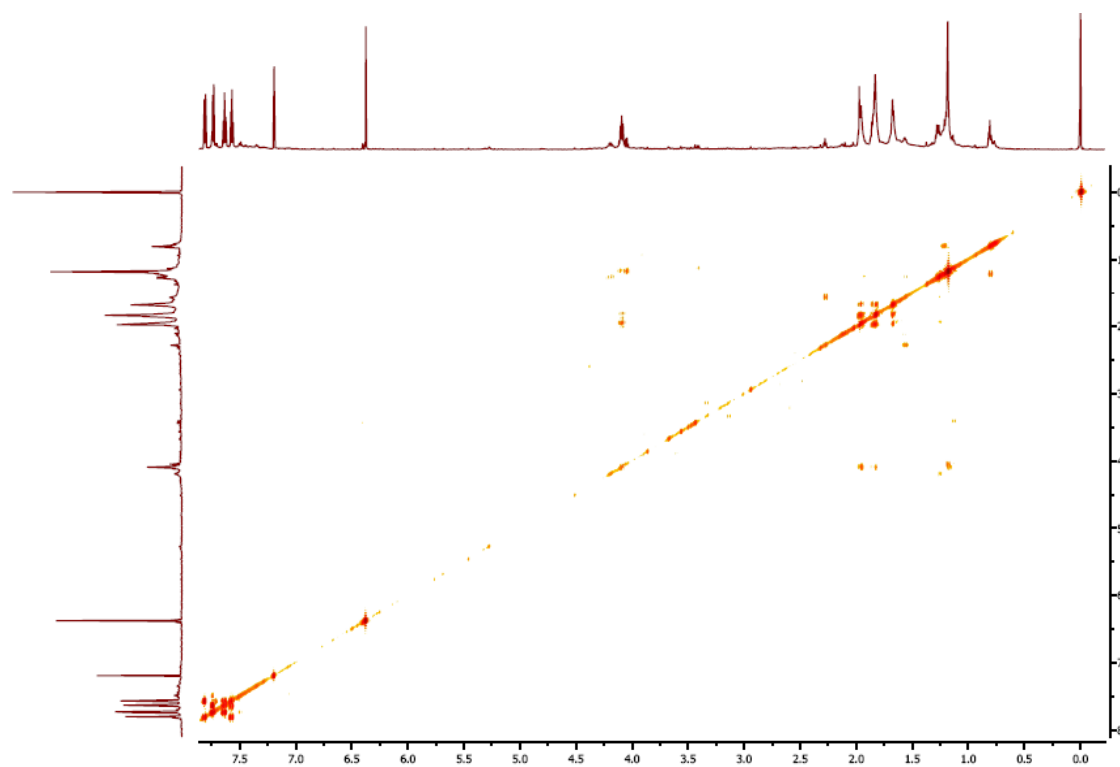

$^1\text{H}$ - $^{13}\text{C}$  HSQC (700 MHz)

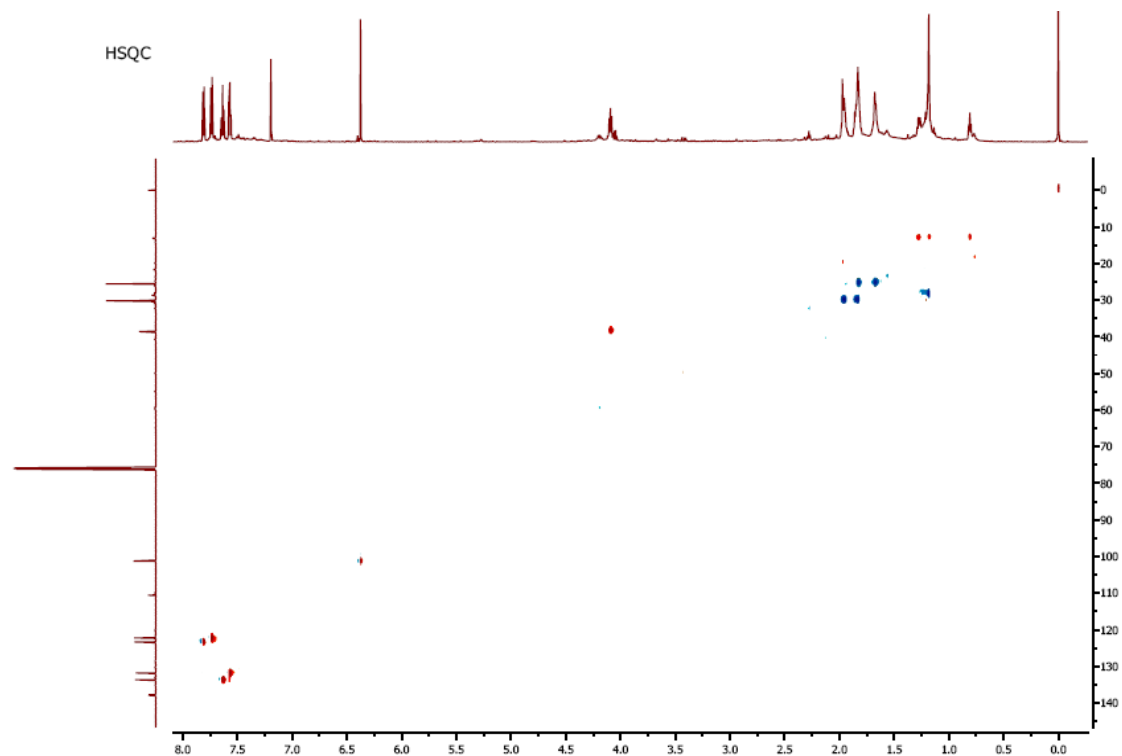

$^1\text{H}$ - $^{13}\text{C}$  HMBC (700 MHz)

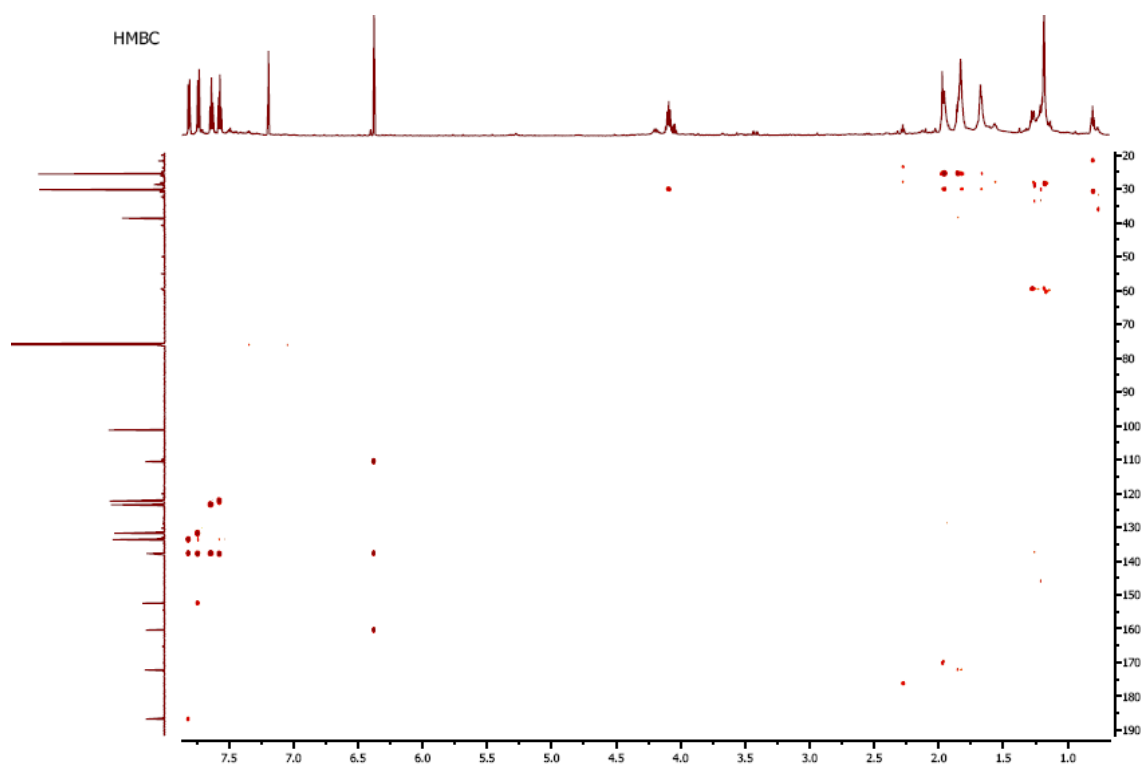

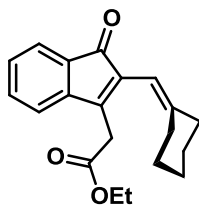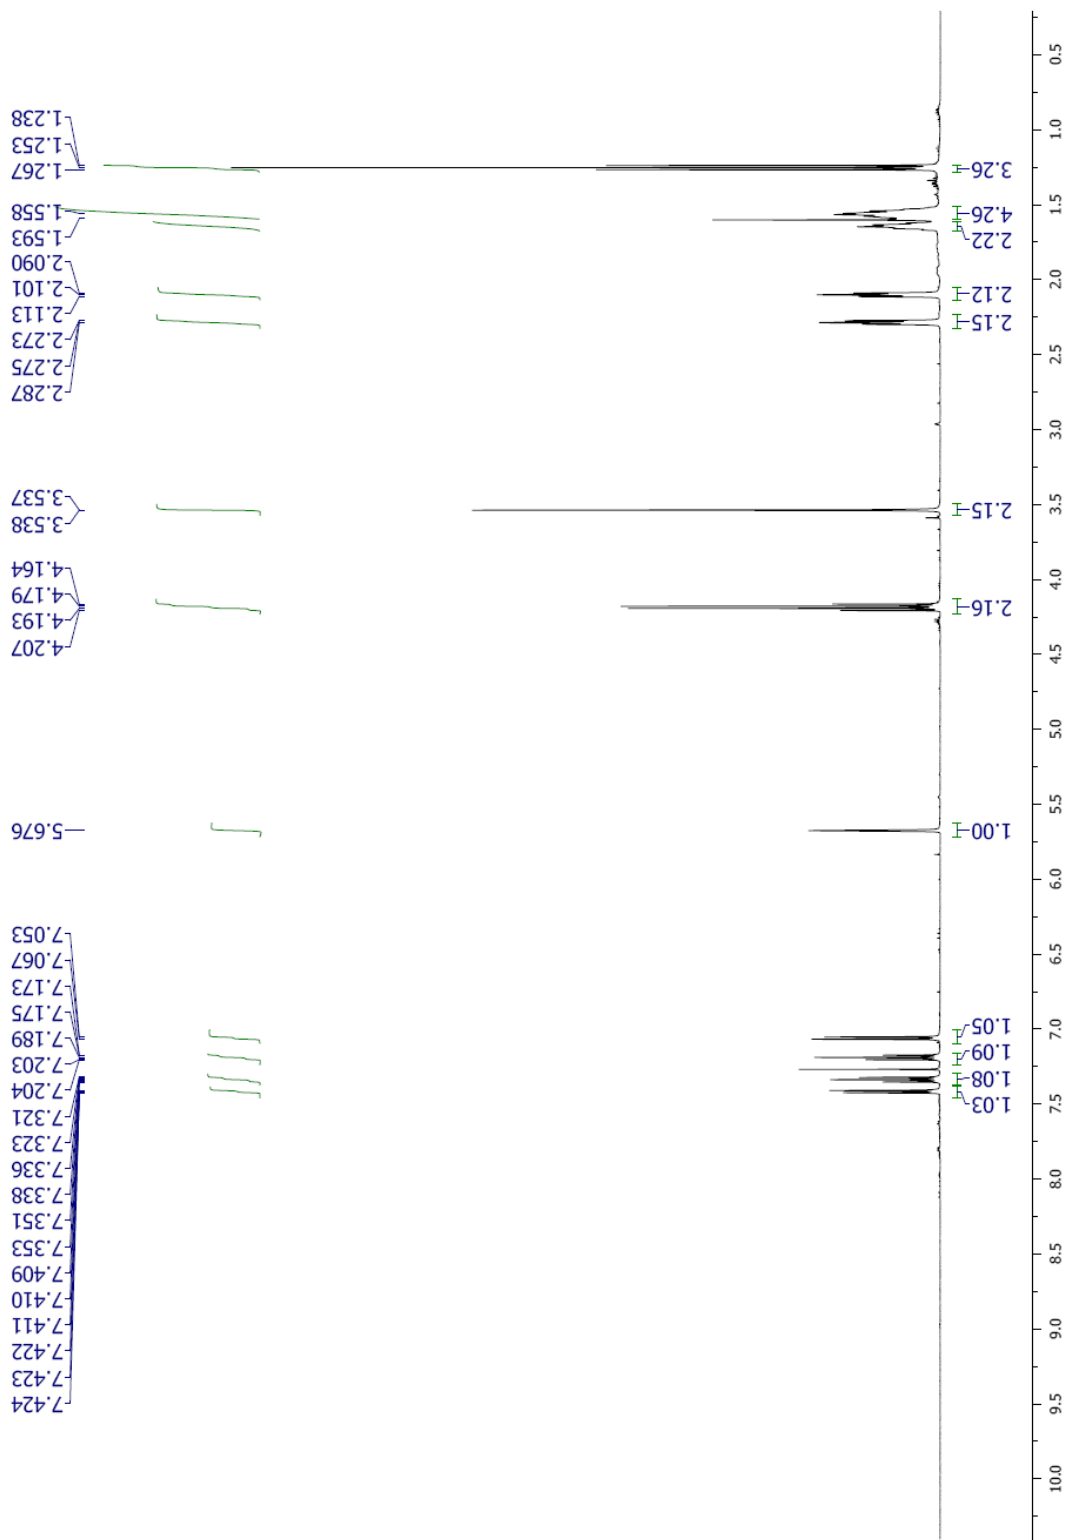

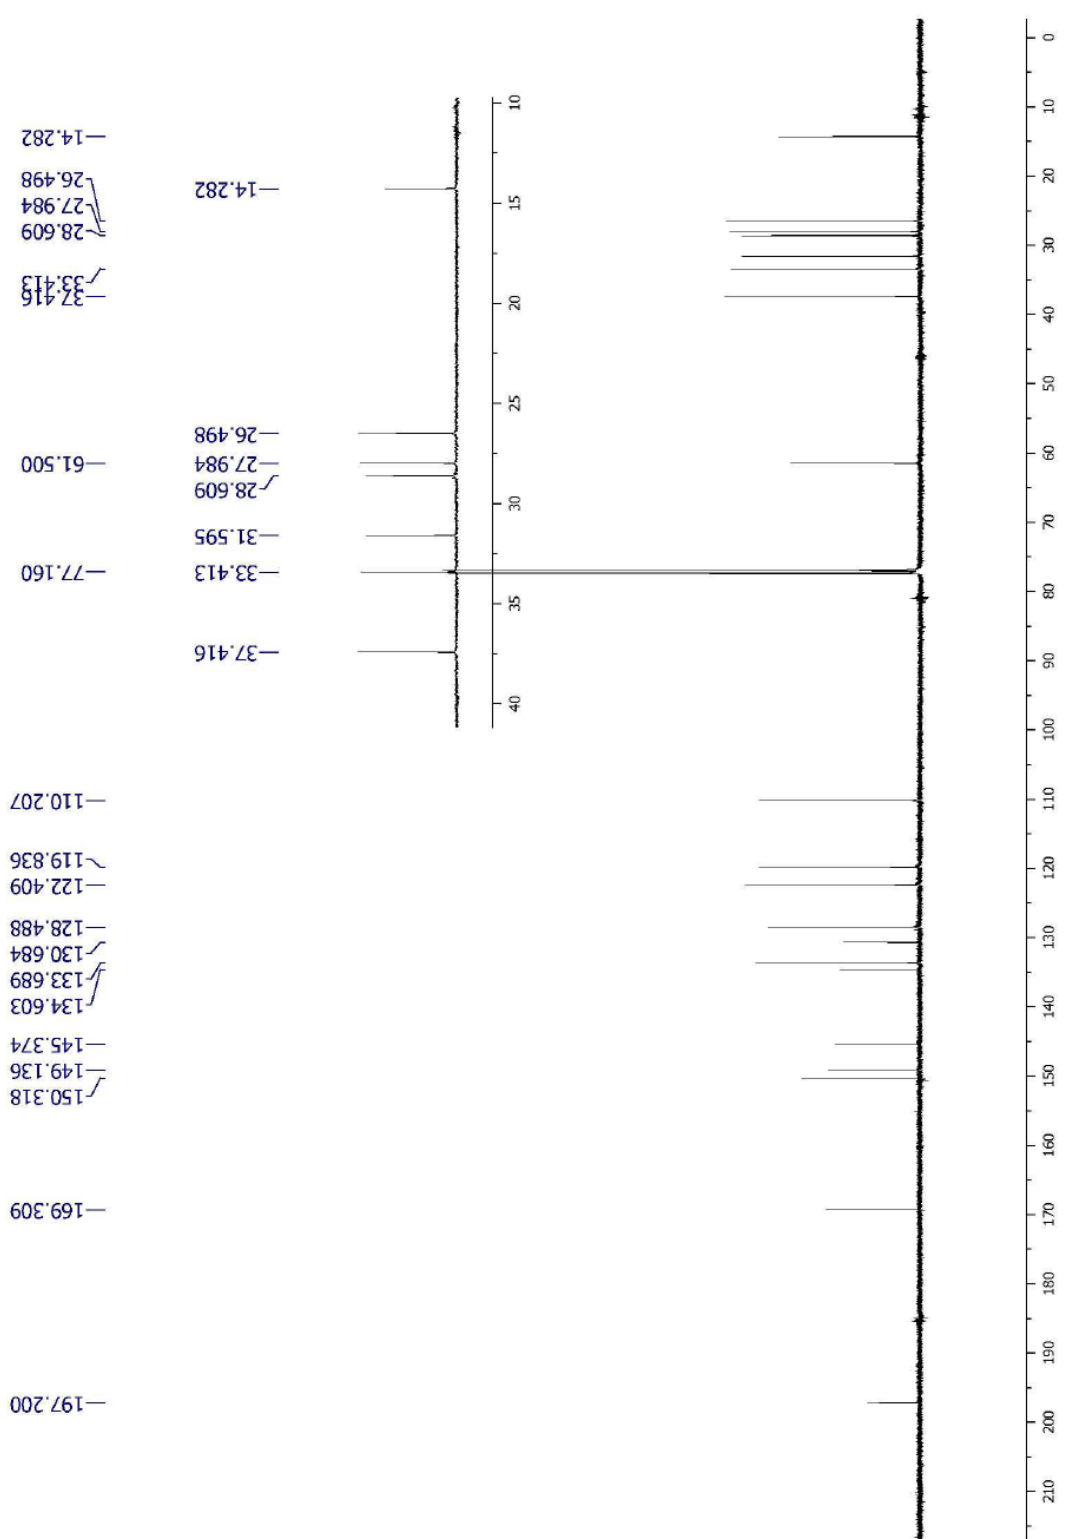

$^1\text{H}$  COSY (400 MHz)

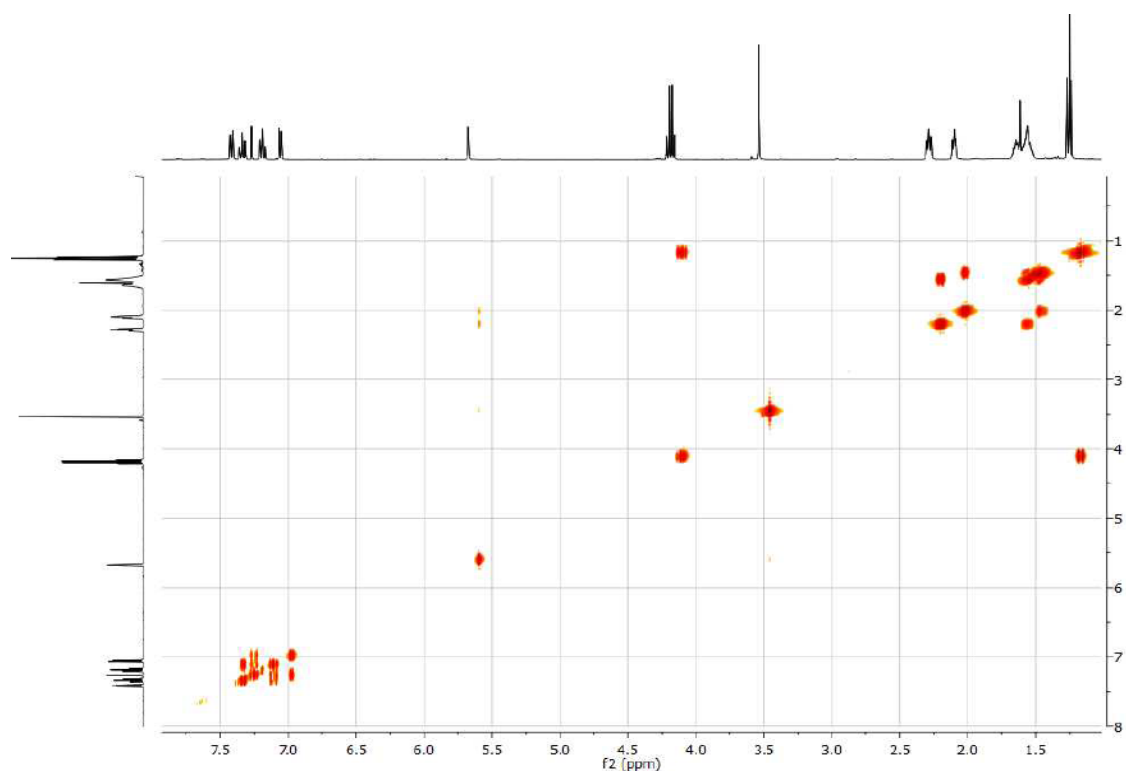

$^1\text{H}$  NOESY (500 MHz)

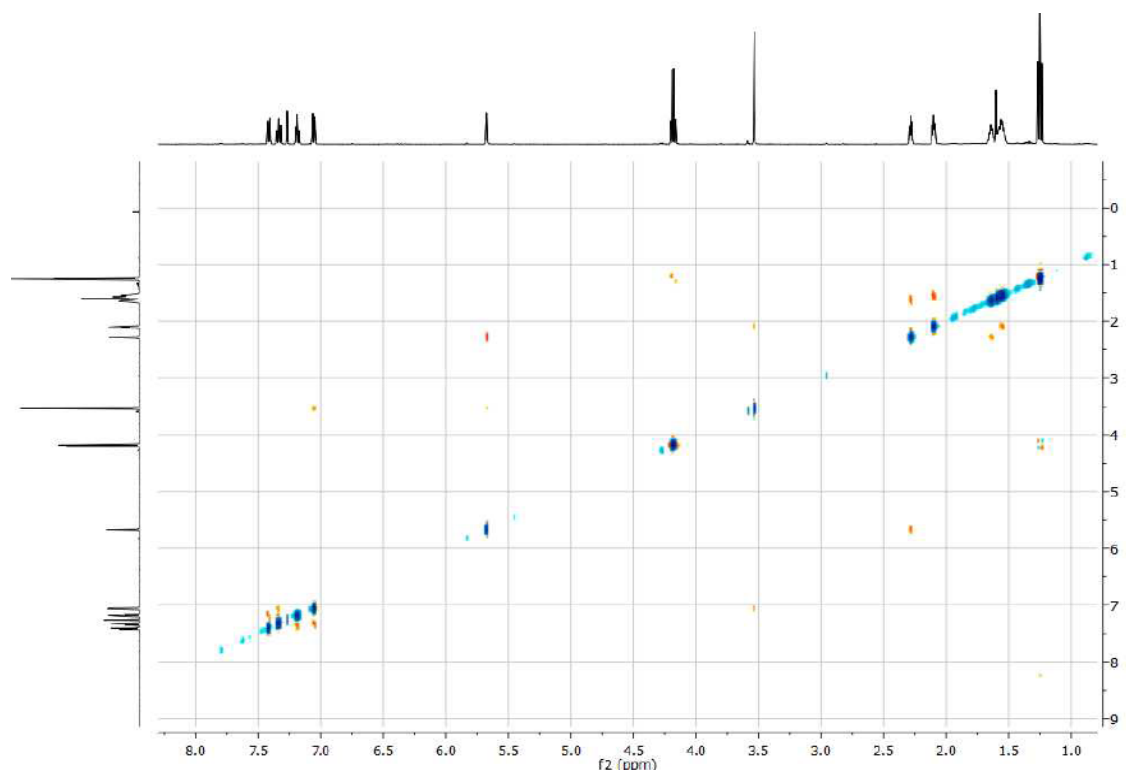



$^1\text{H}$ - $^{13}\text{C}$  HSQC (600 MHz)

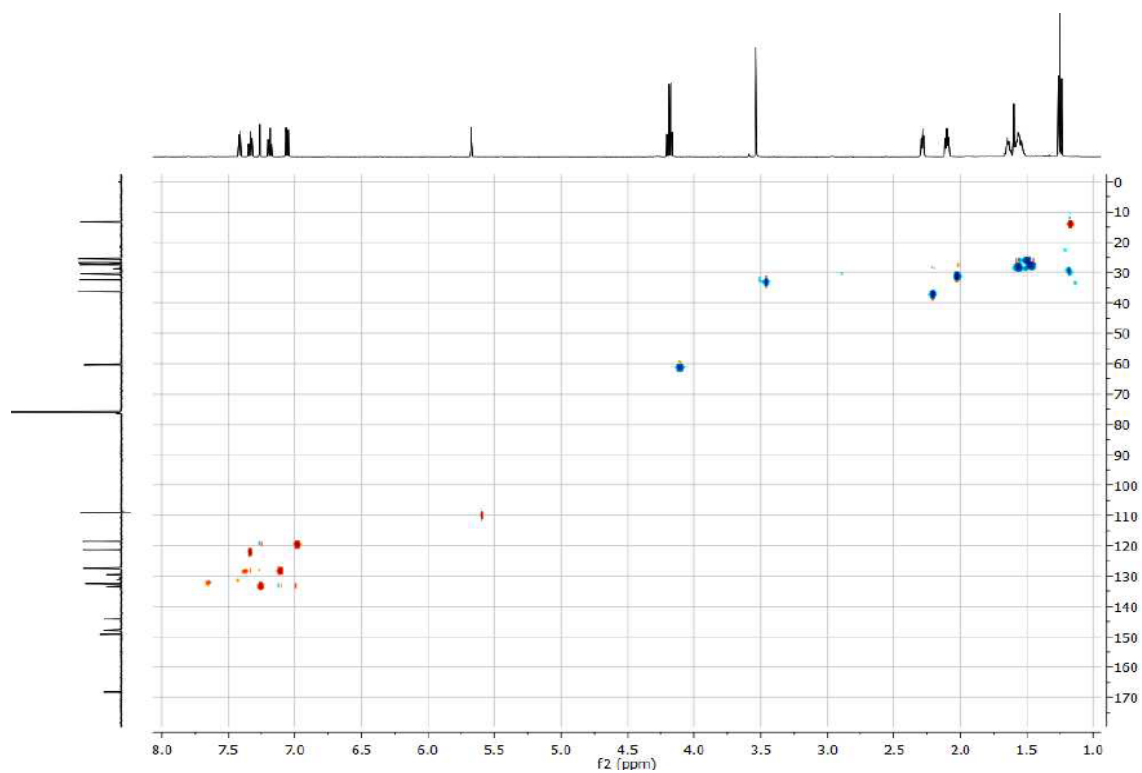

$^1\text{H}$ - $^{13}\text{C}$  HMBC (600 MHz)

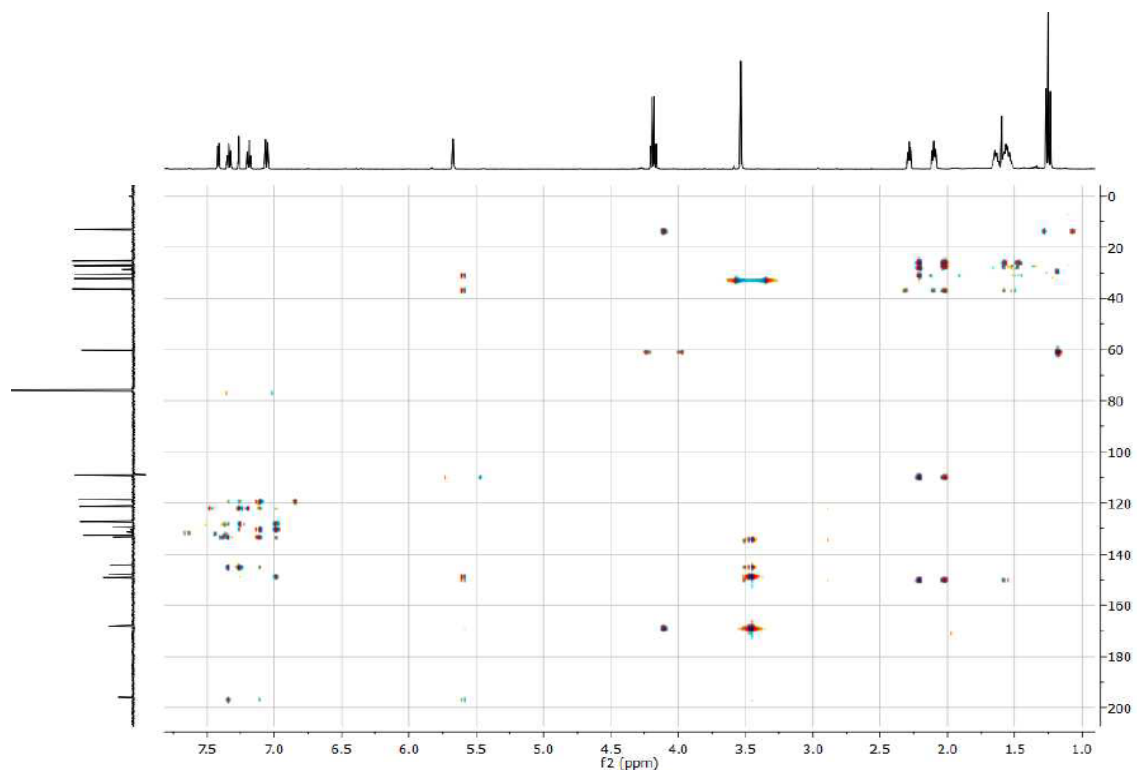

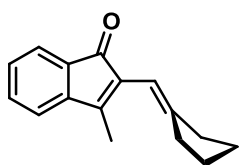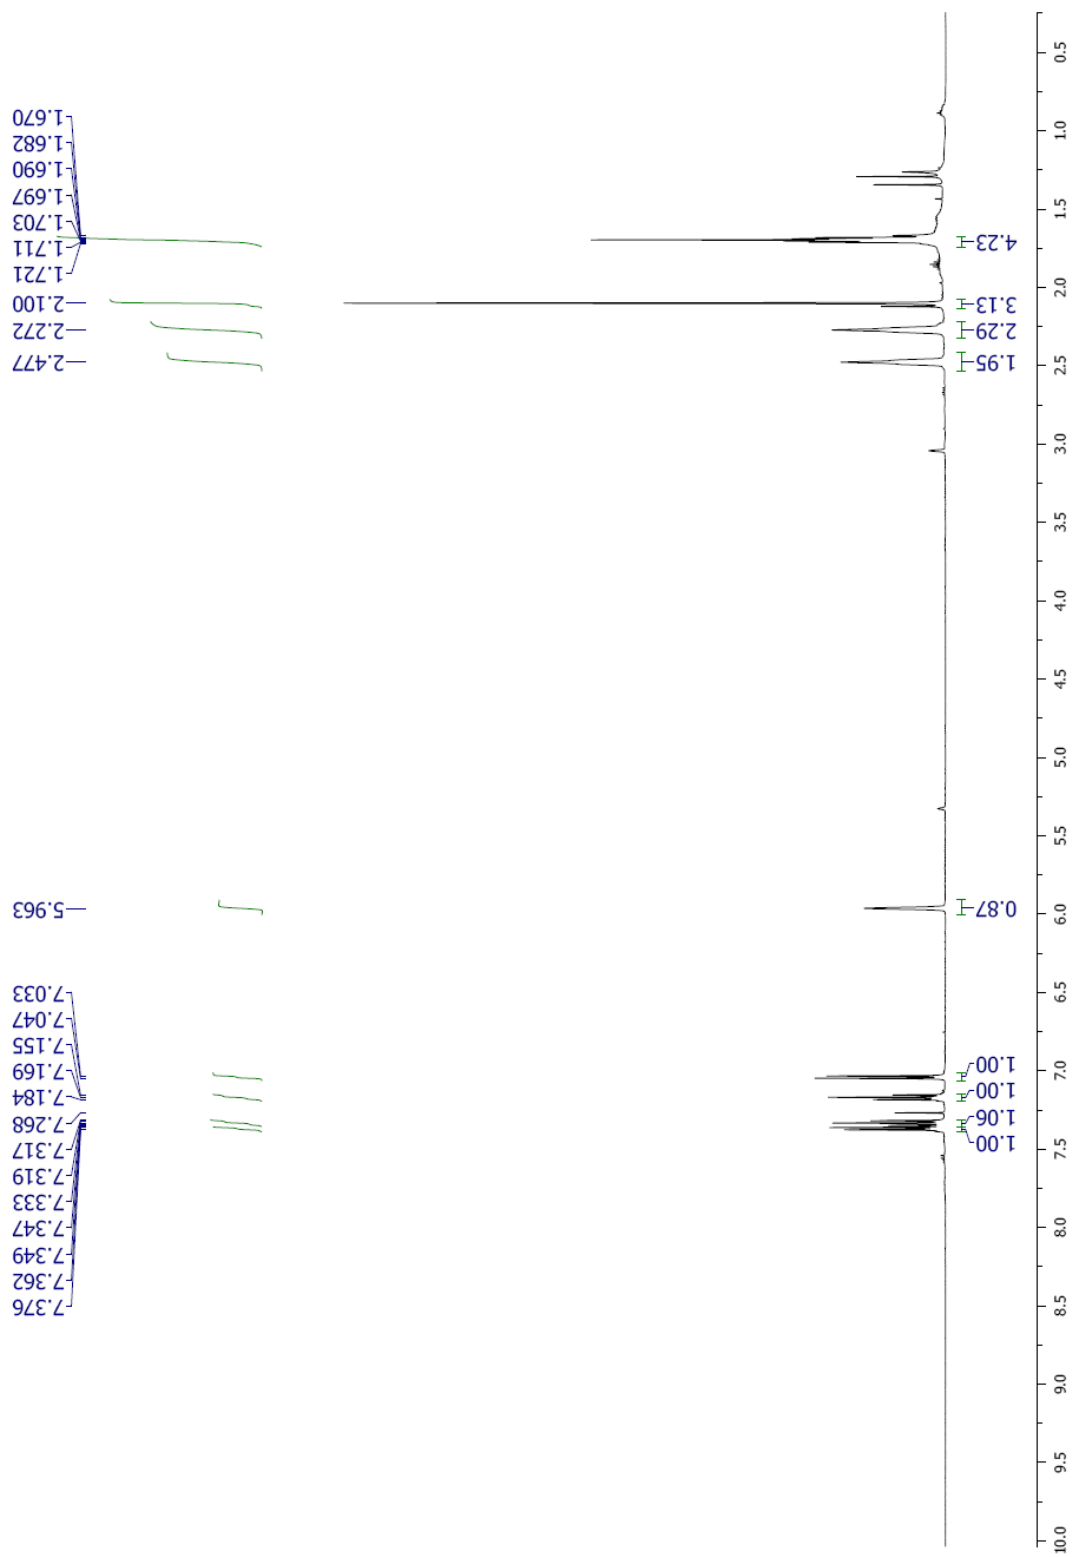

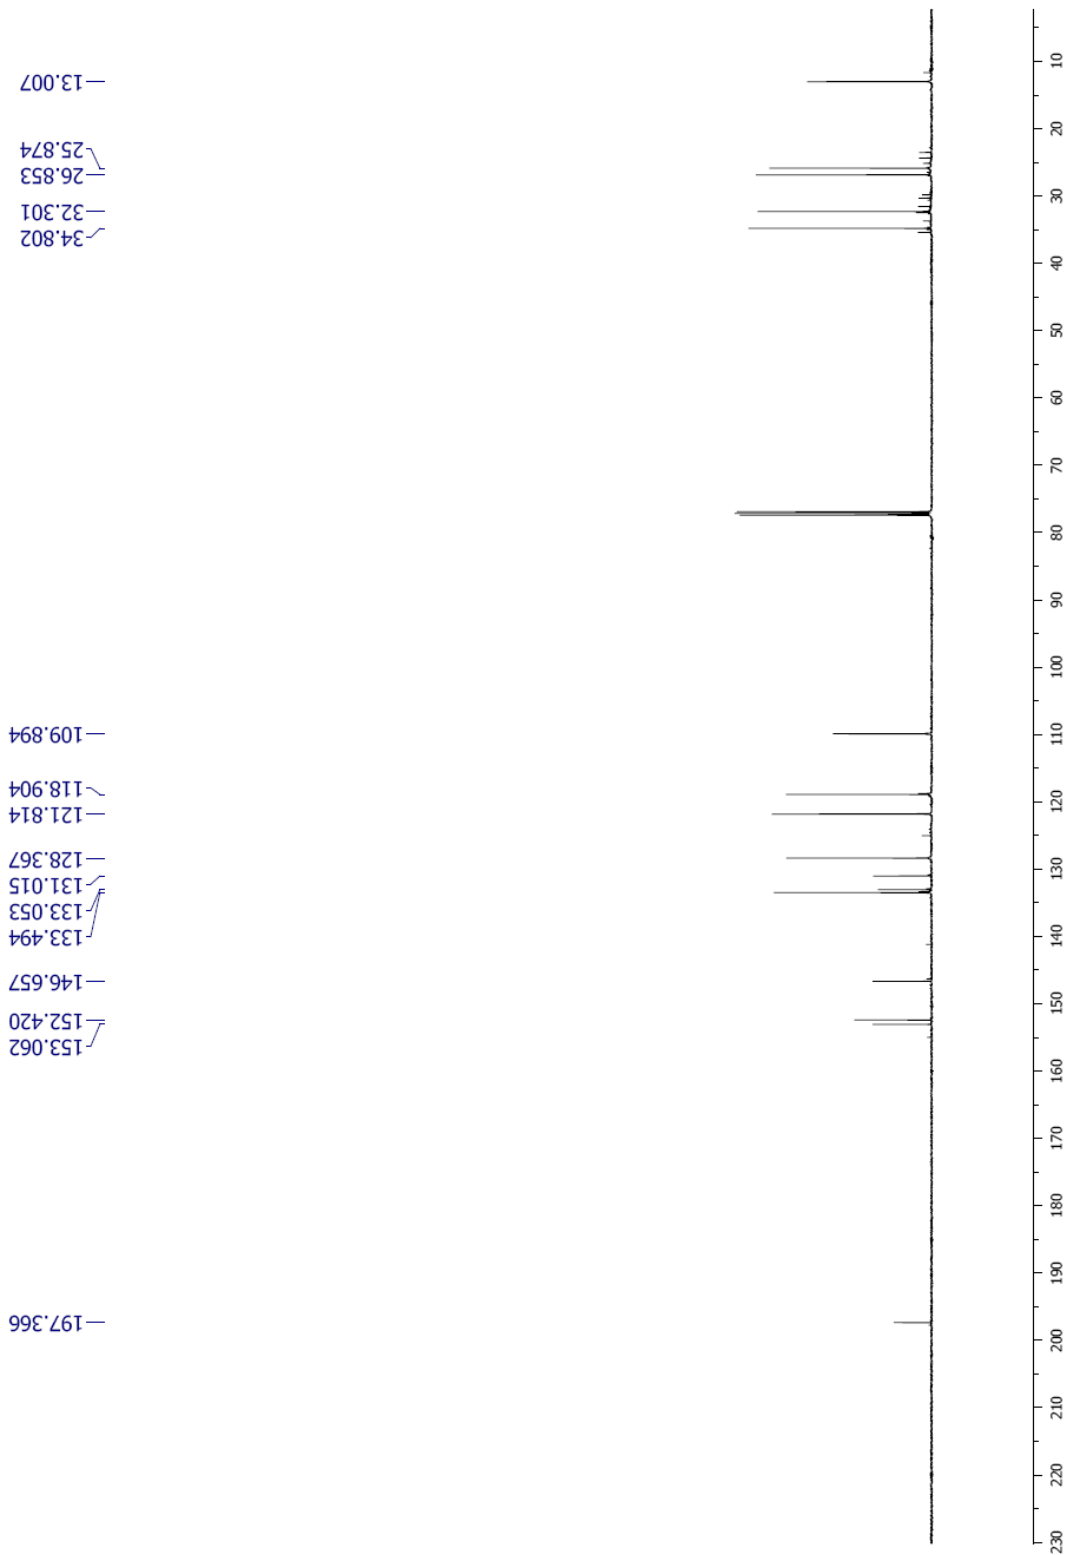

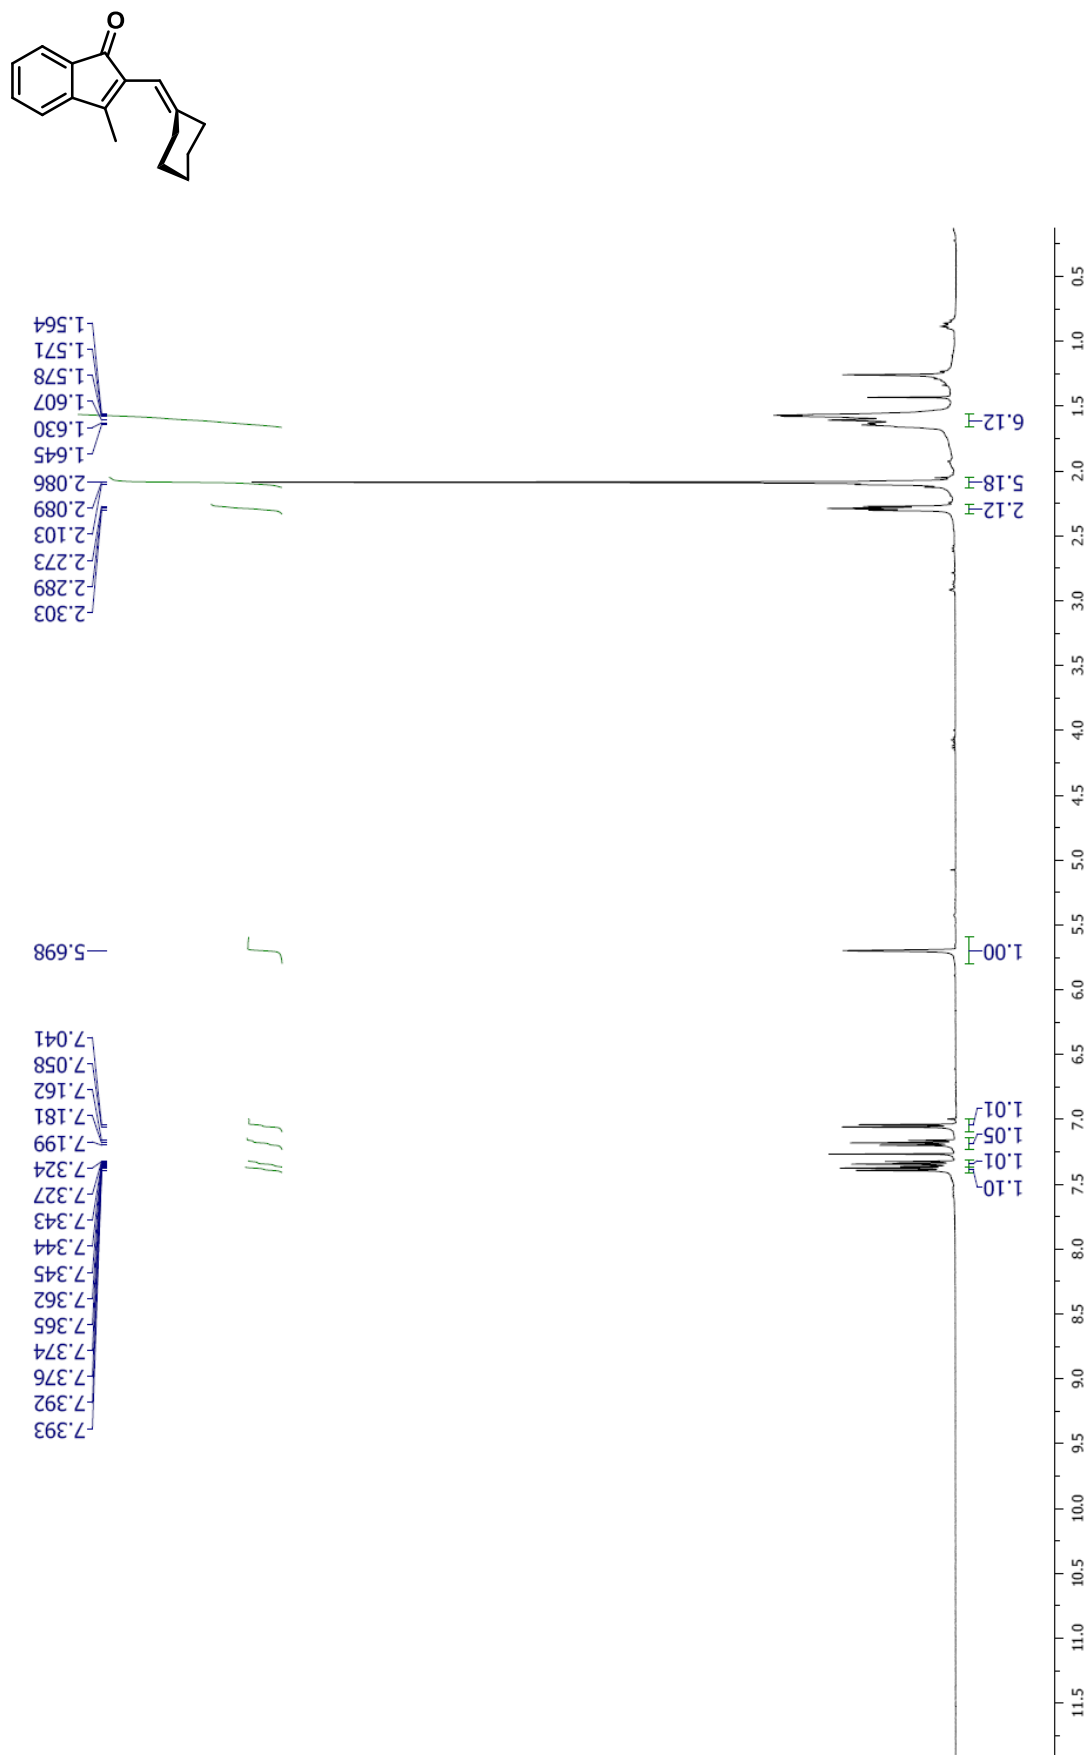

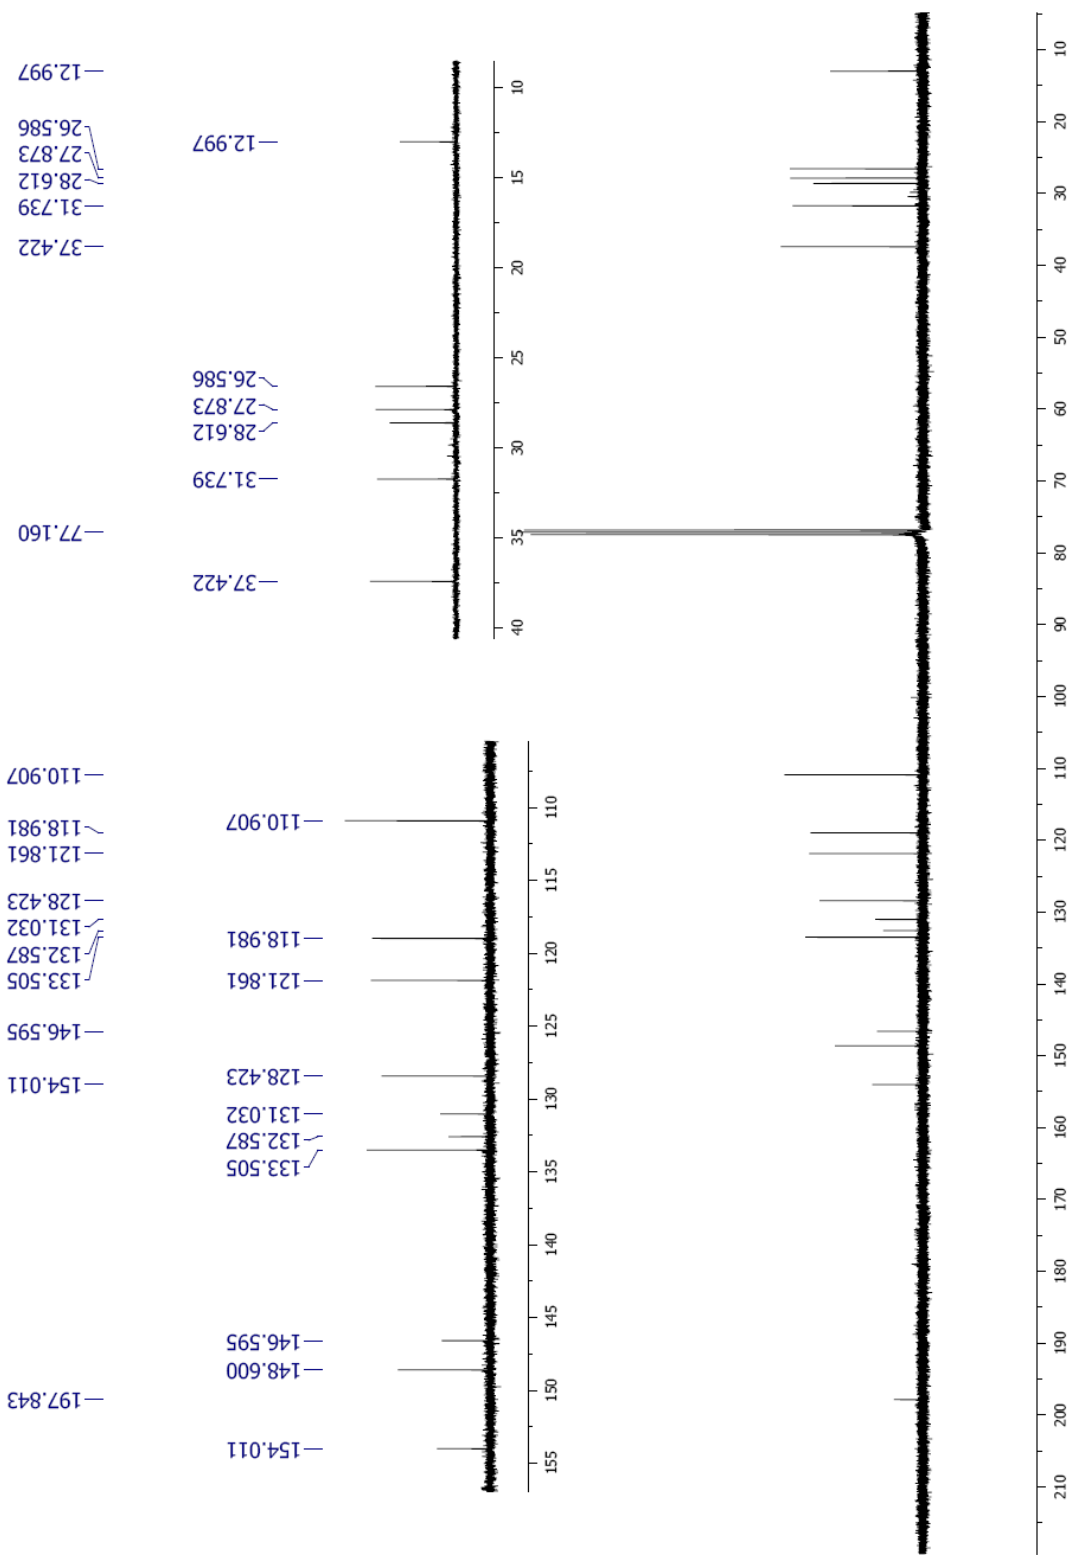

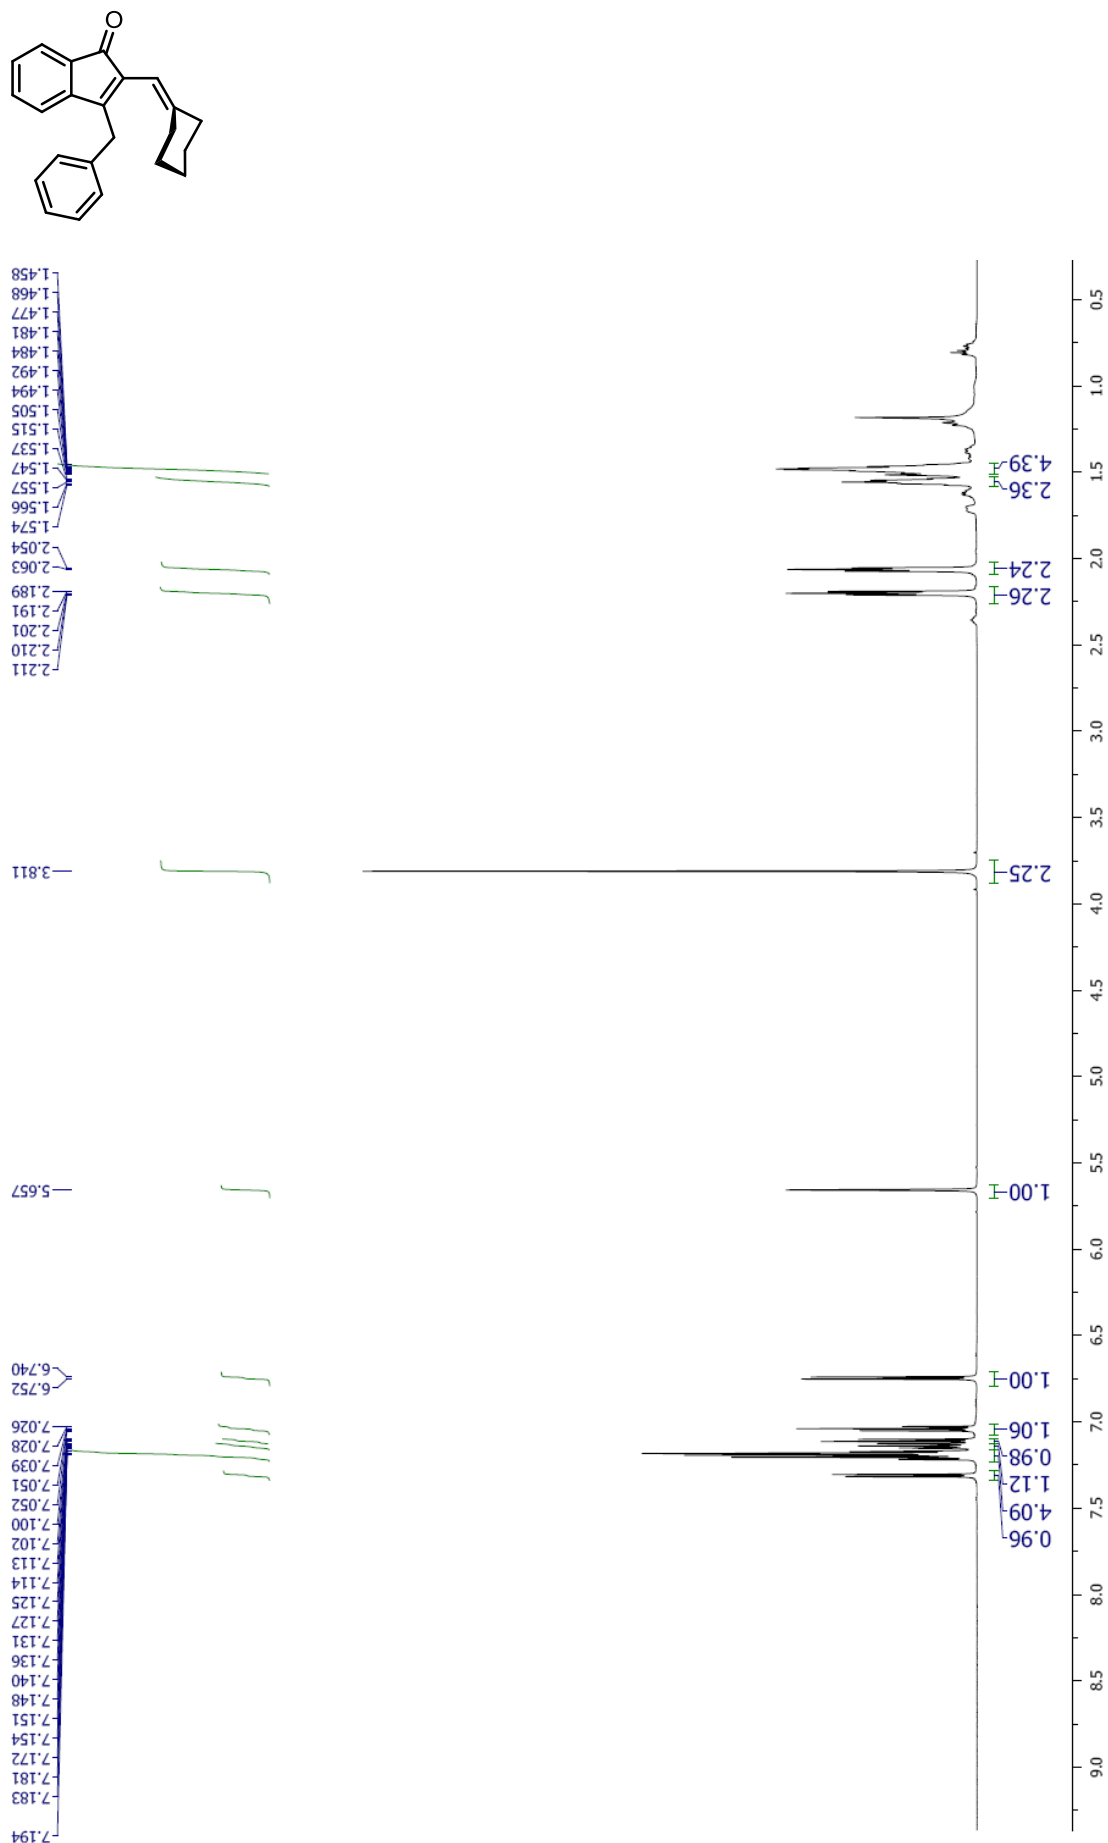

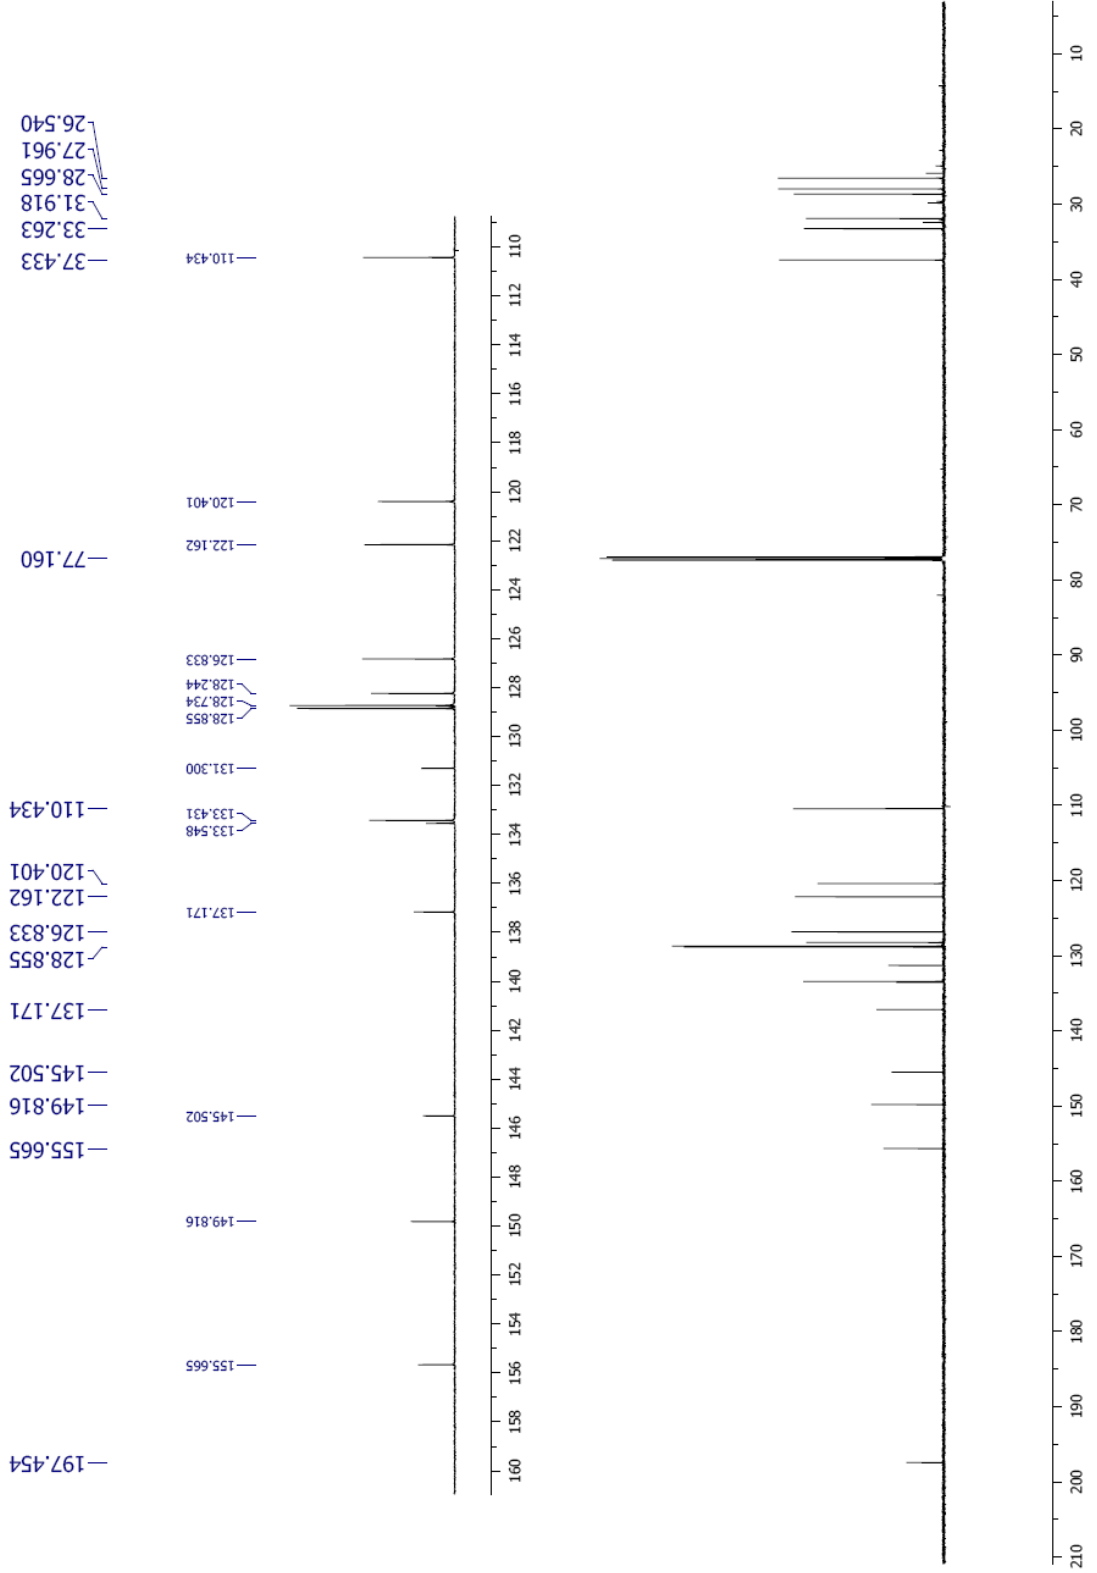

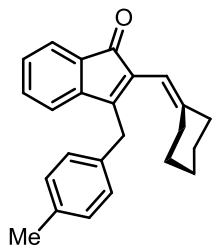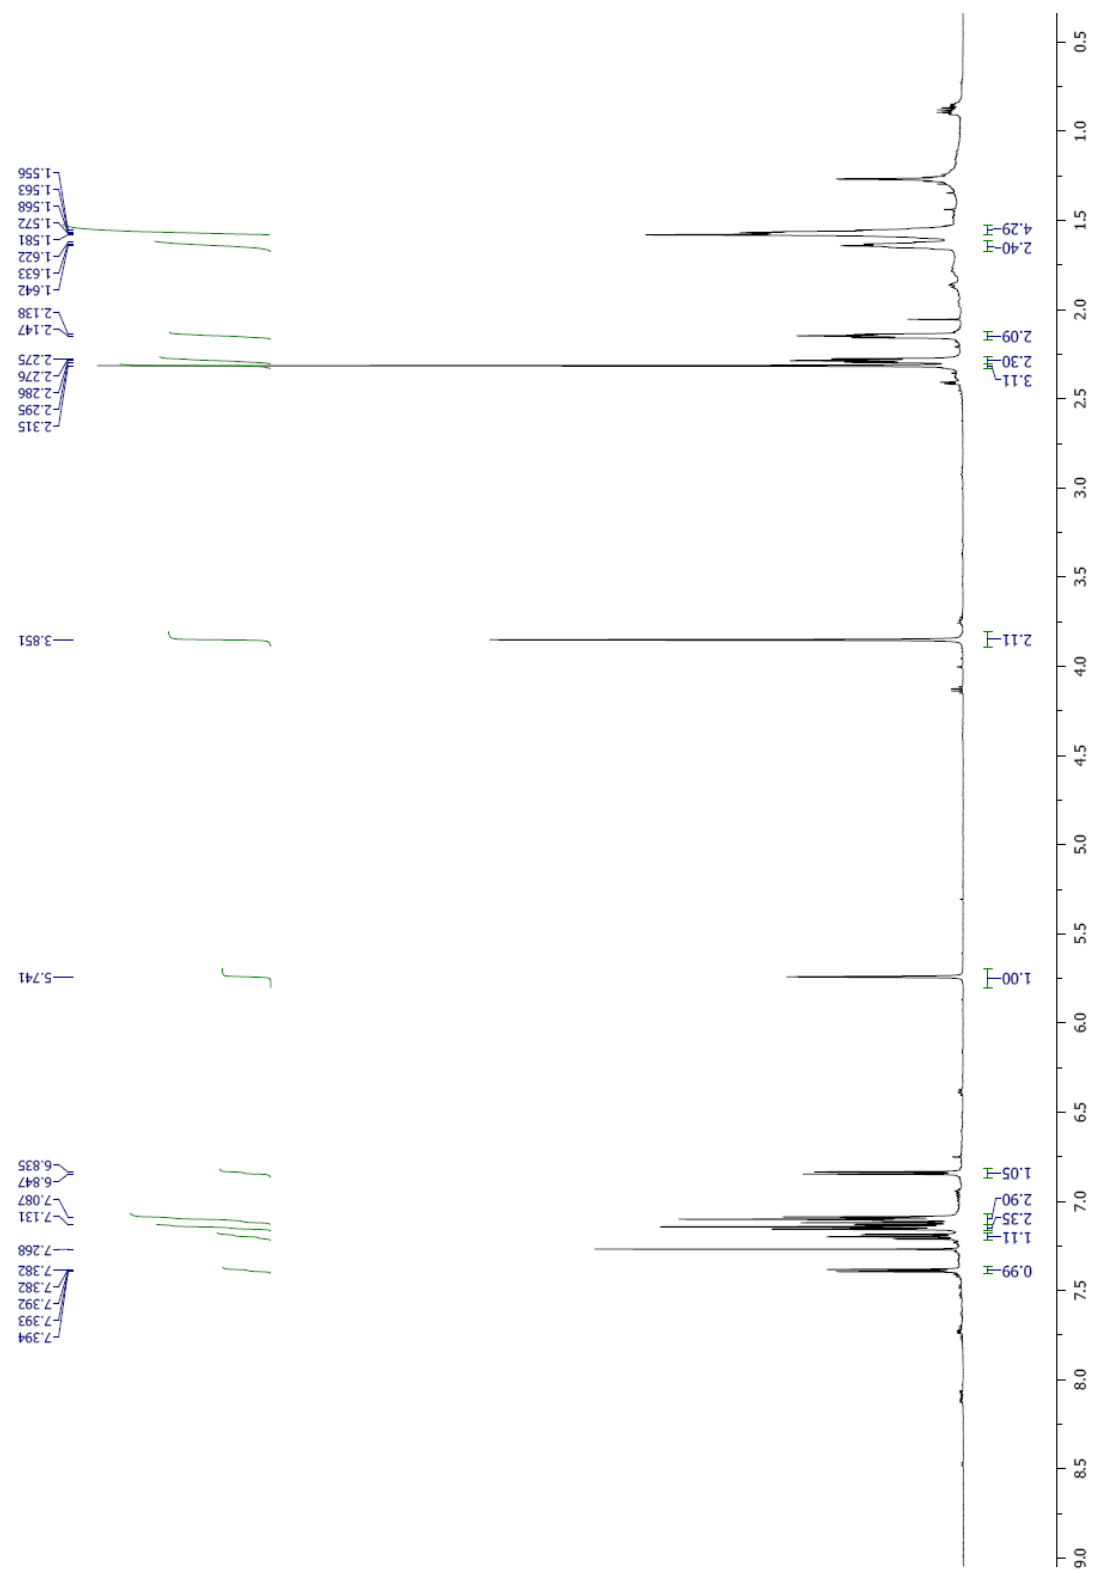



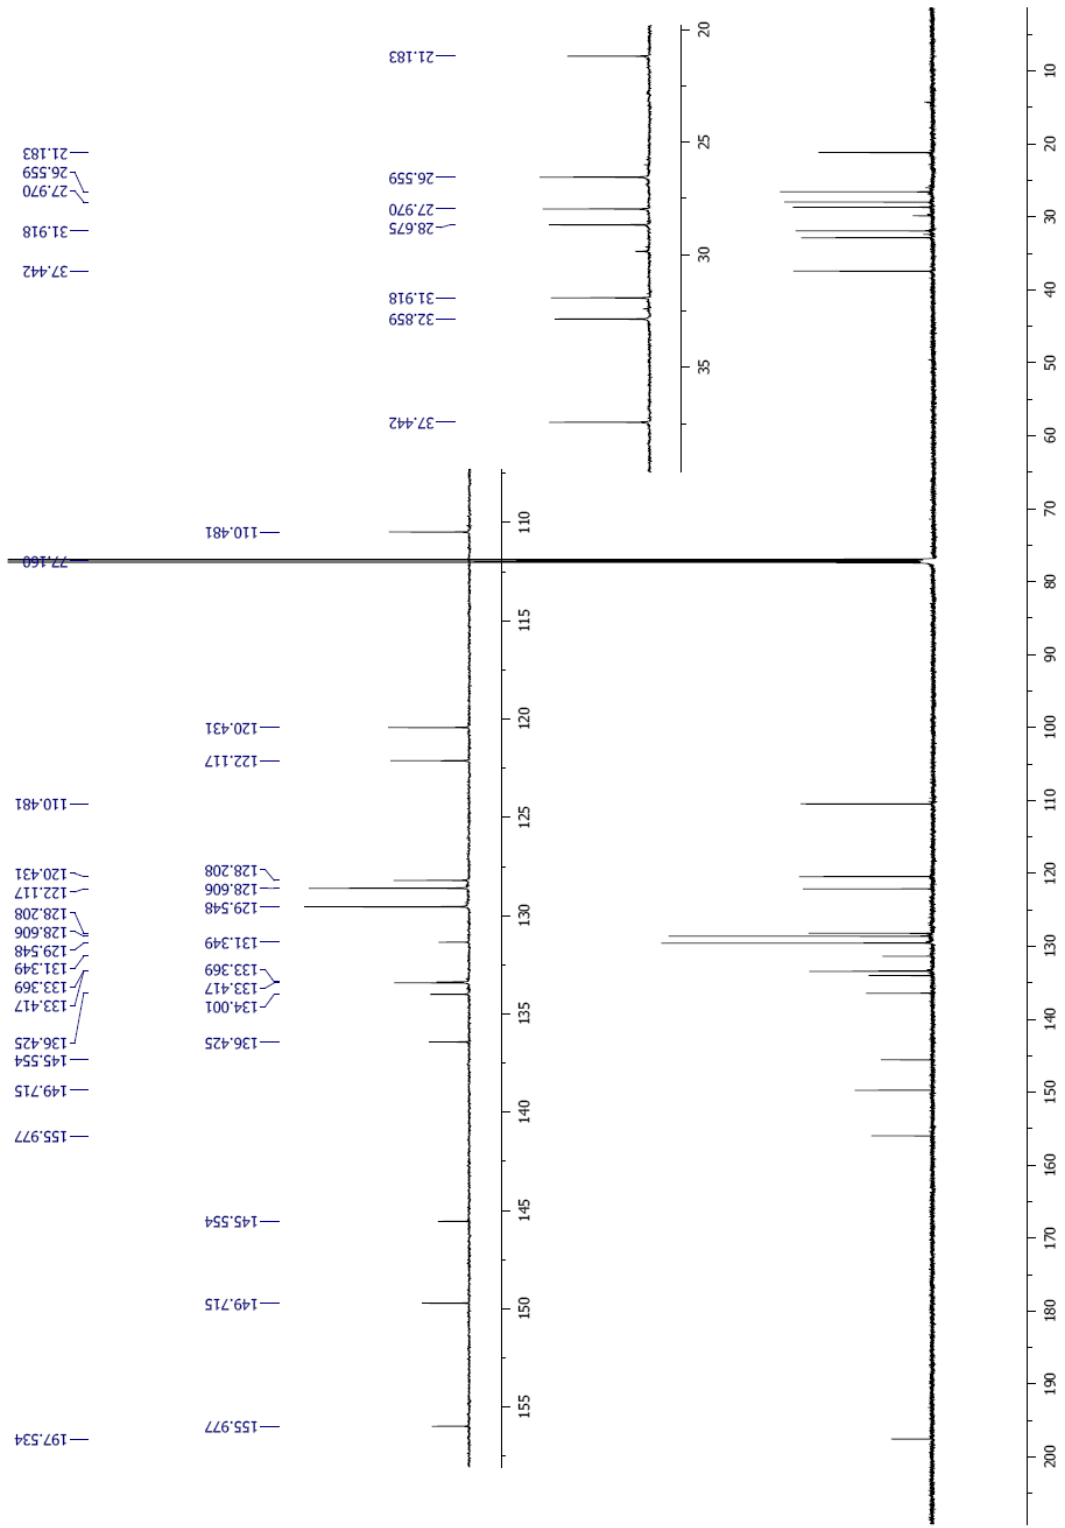

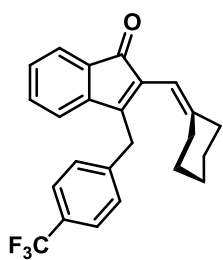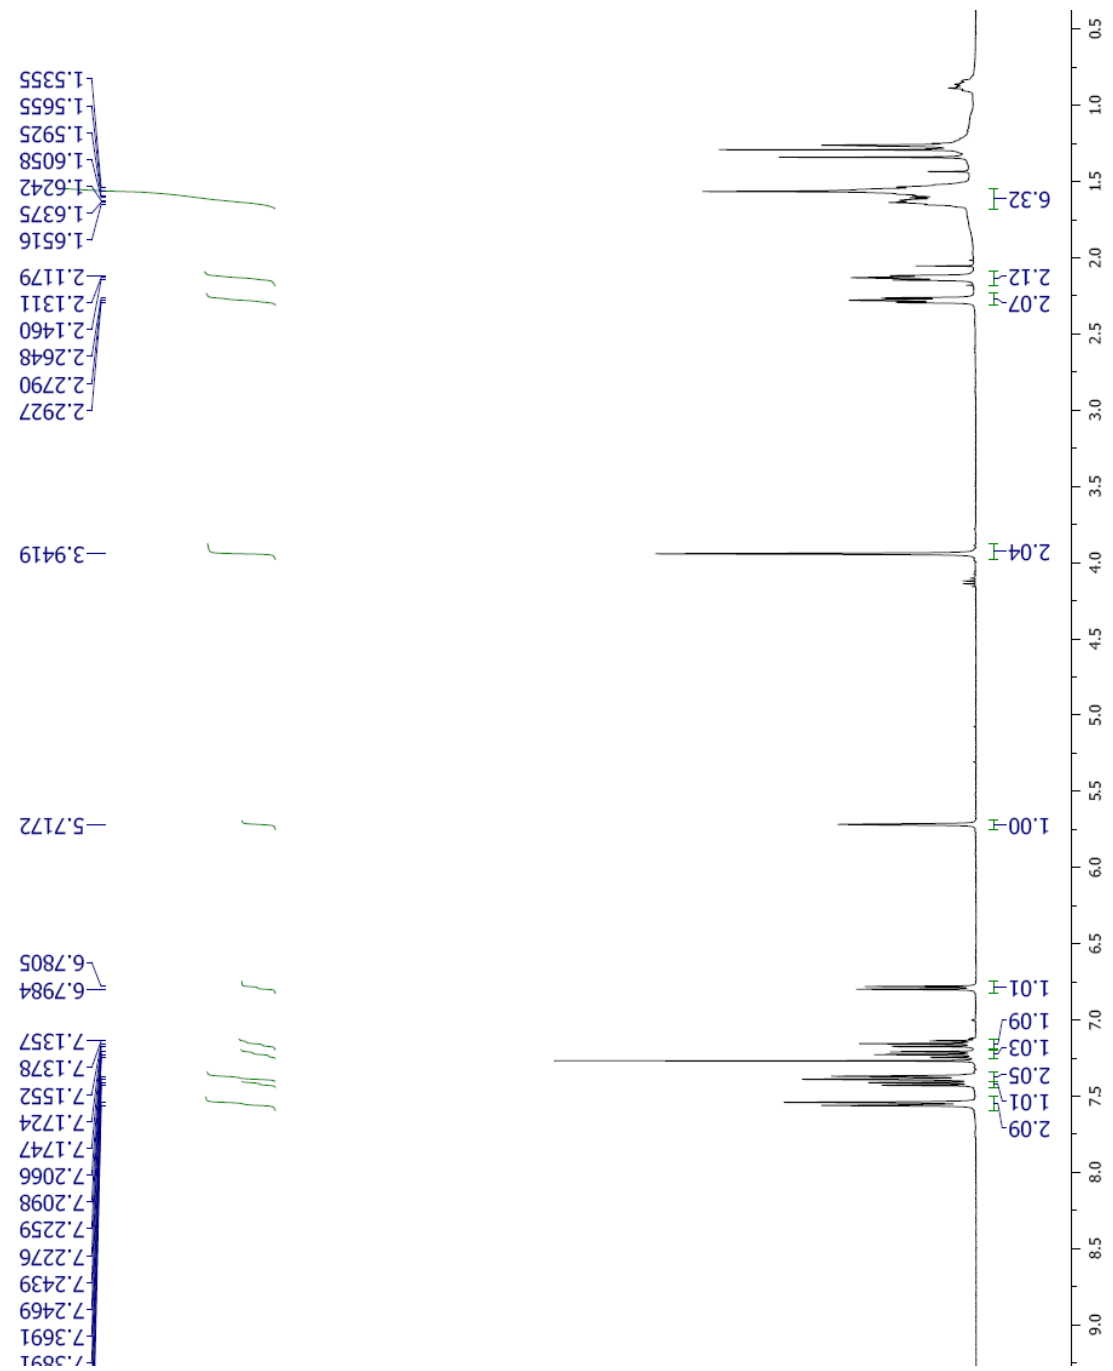

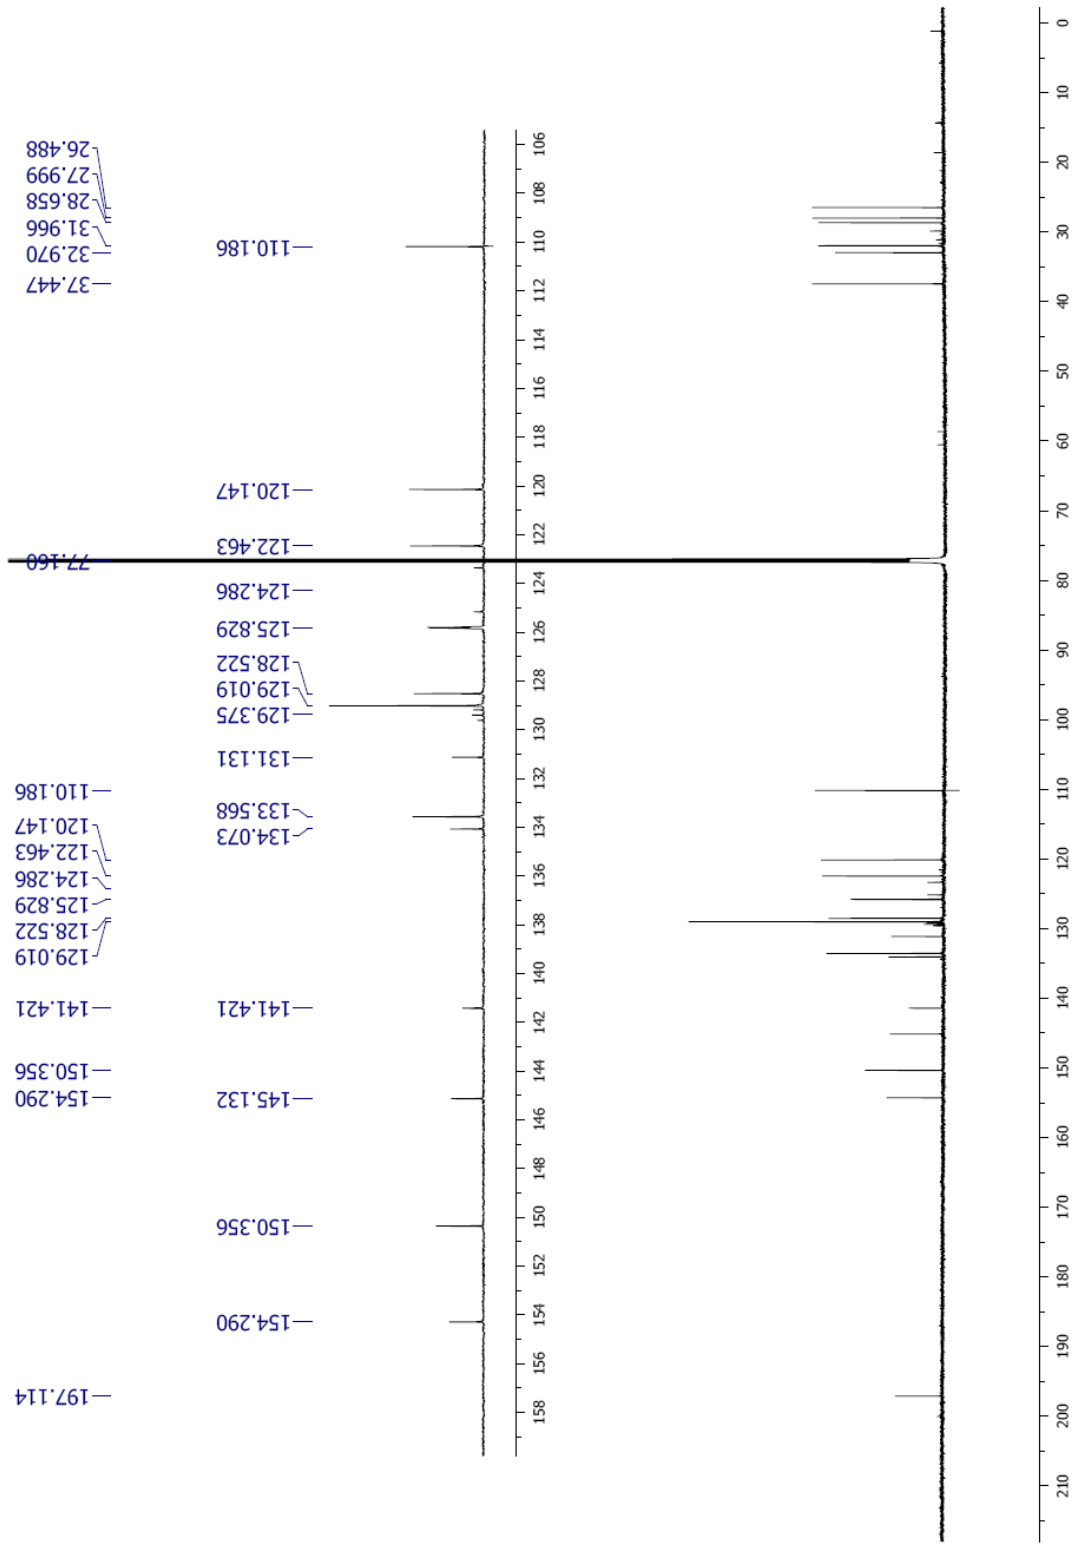

$^{19}\text{F}$ NMR (376 MHz)

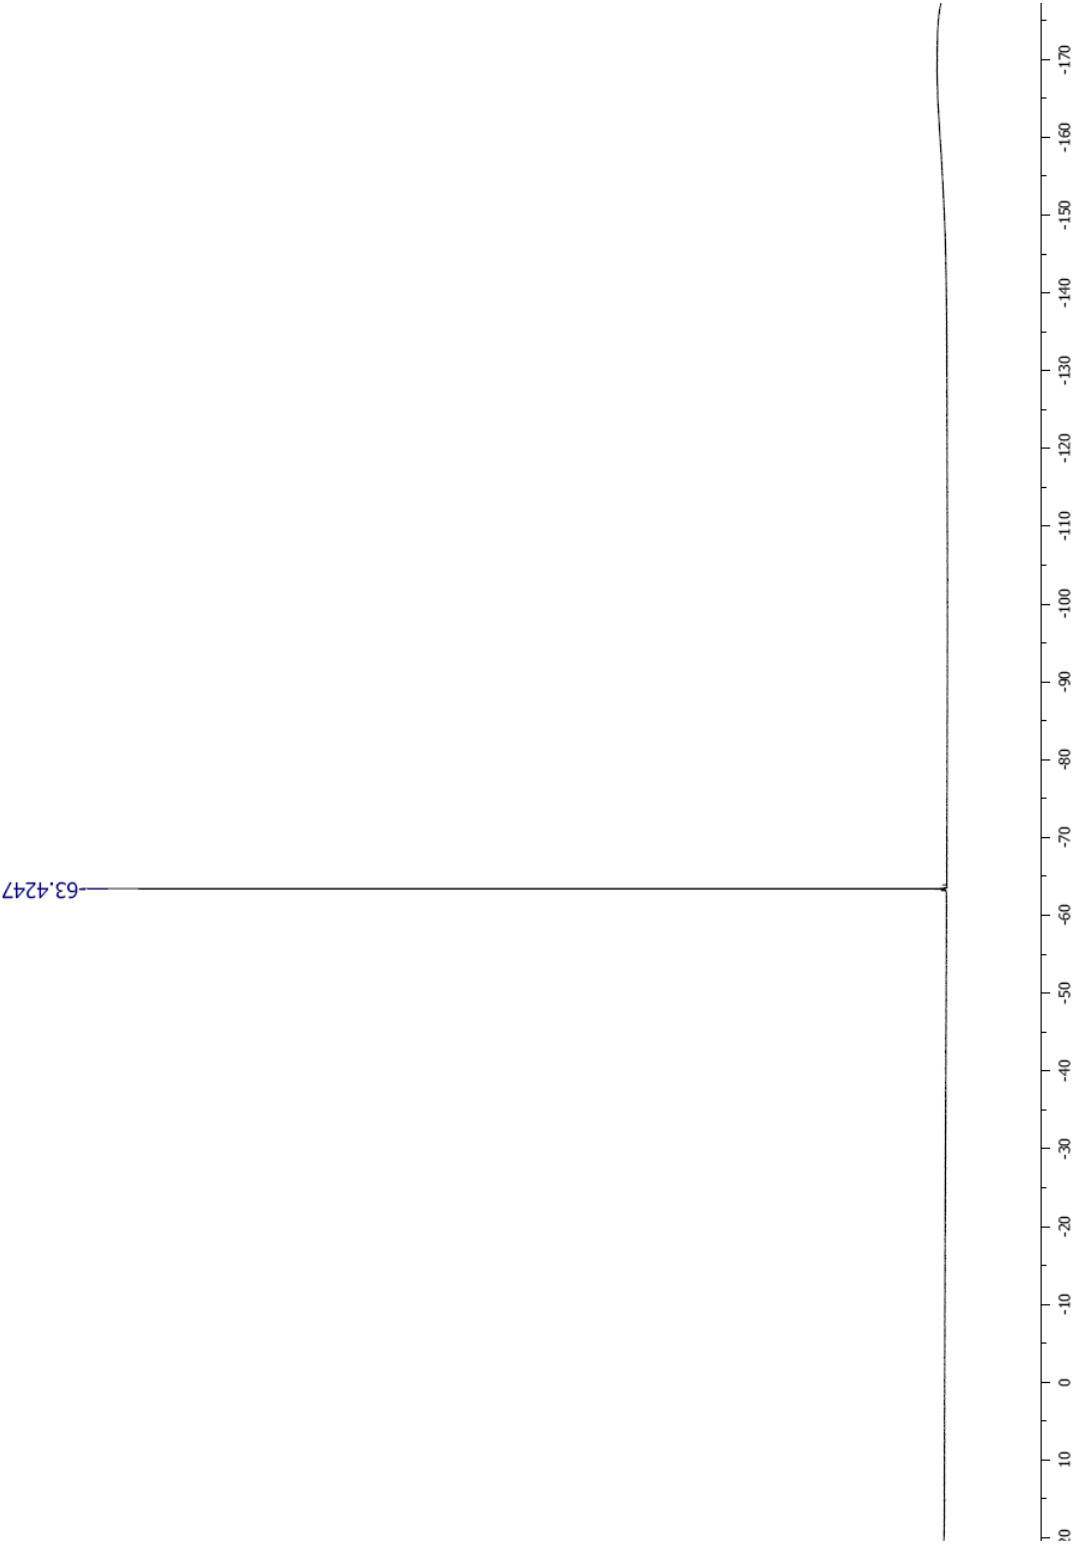

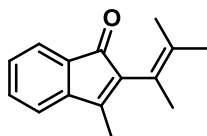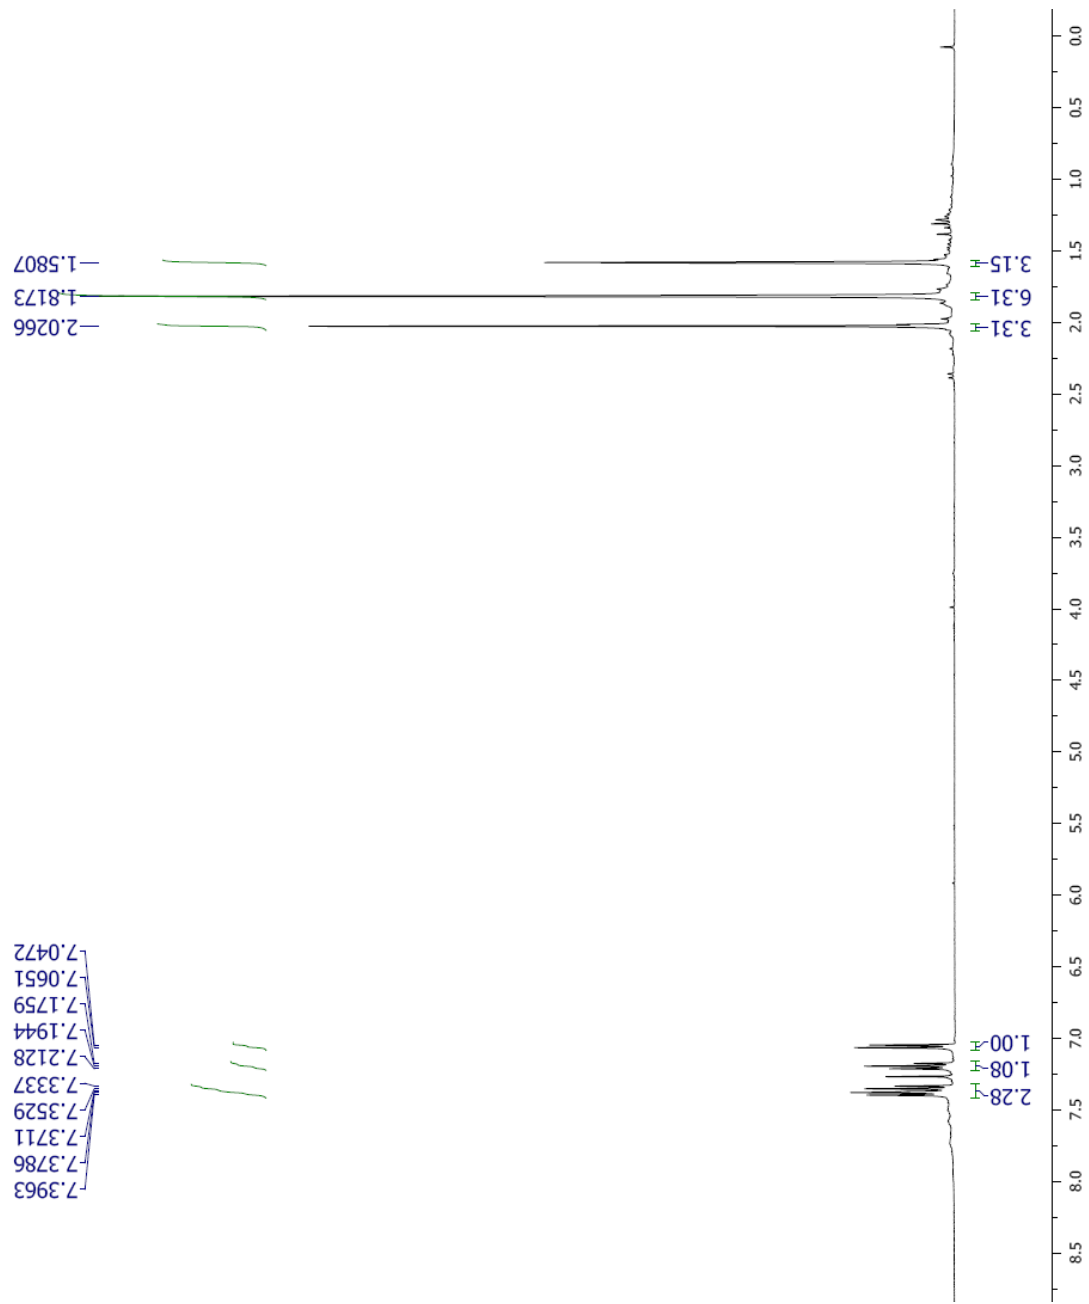

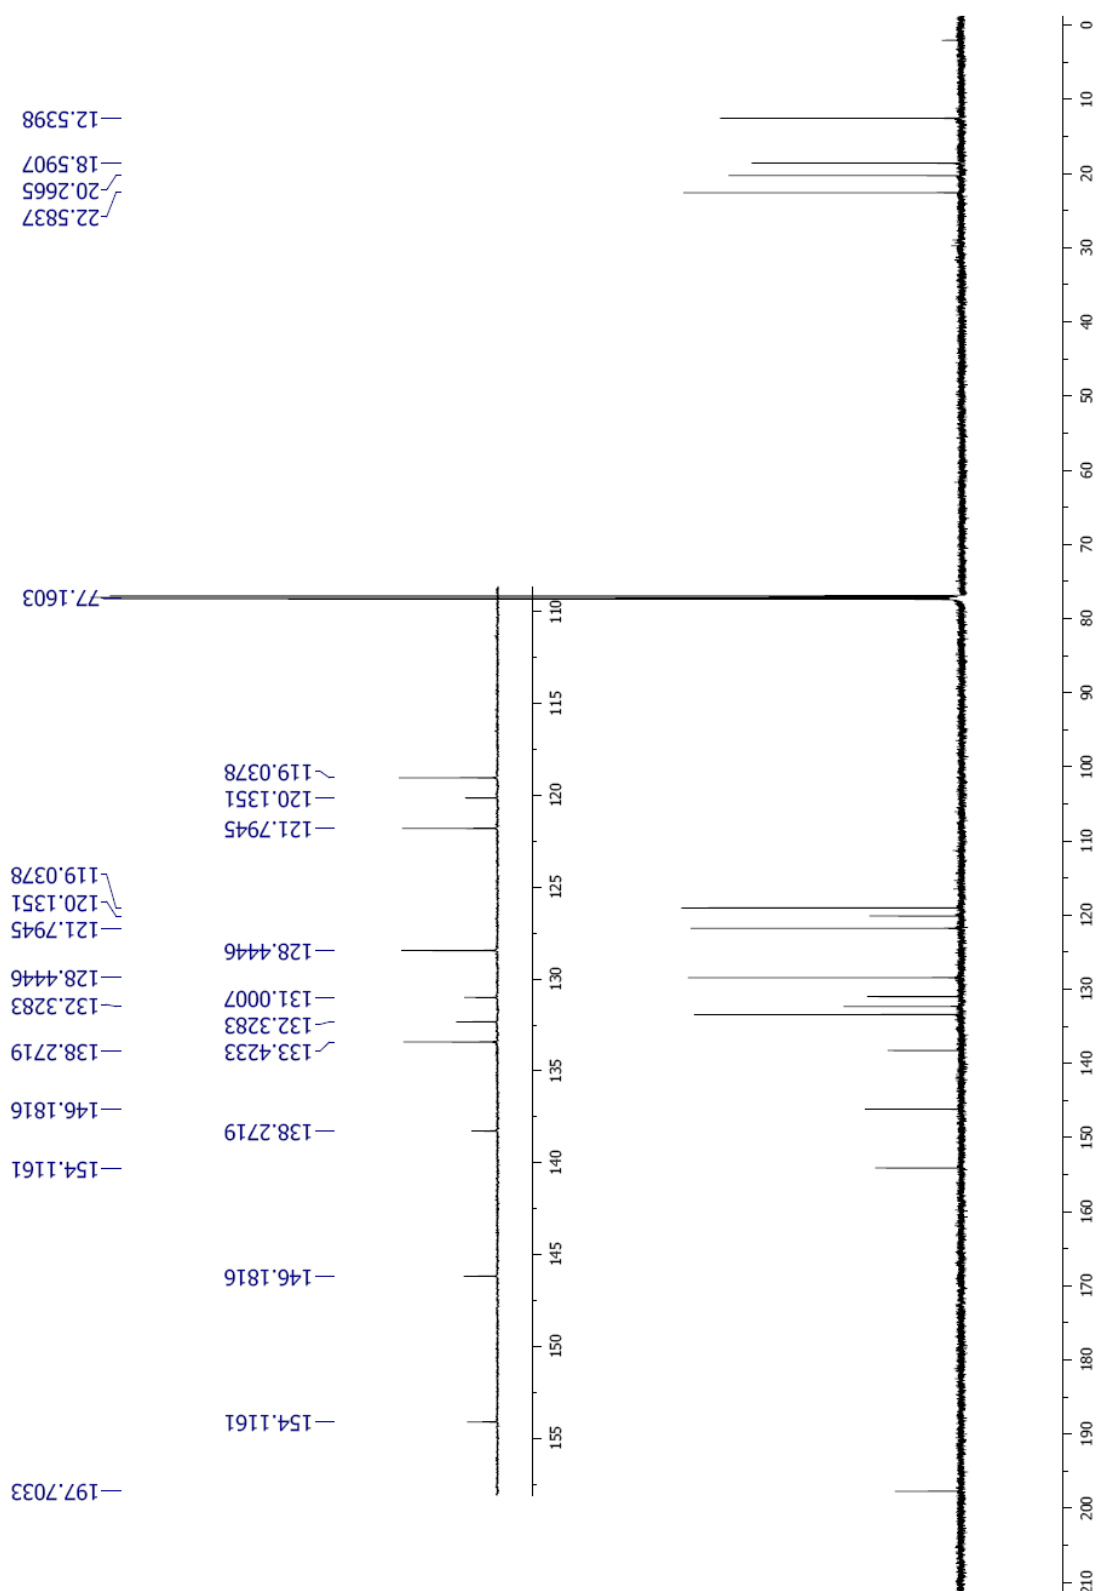

$^1\text{H}$  COSY (400 MHz)

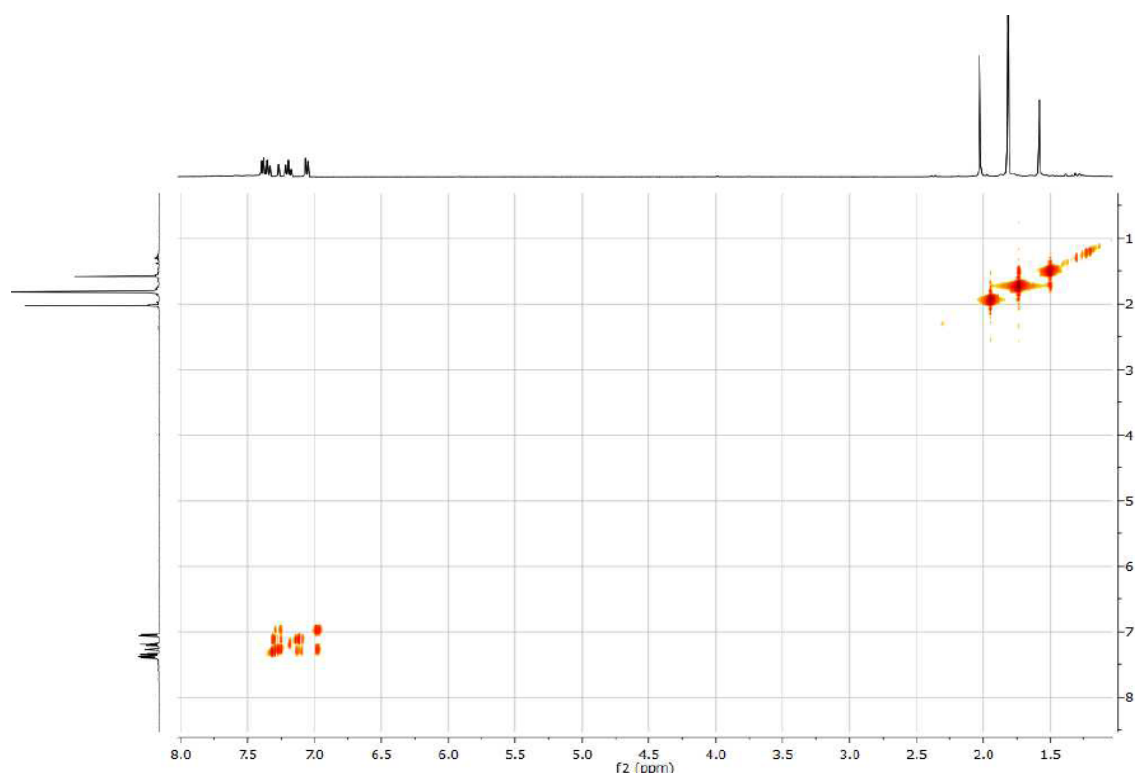

$^1\text{H}$ - $^{13}\text{C}$  HSQC (600 MHz)

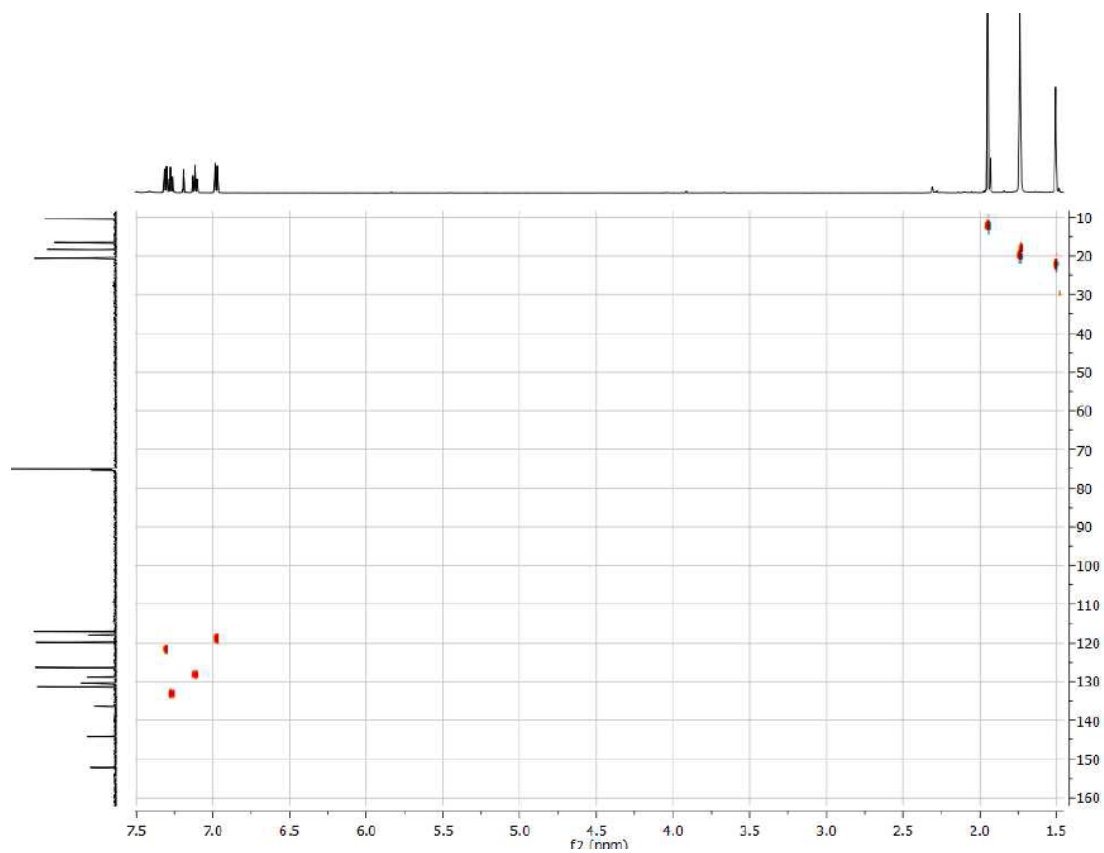

$^1\text{H}$ - $^{13}\text{C}$  HMBC (600 MHz)

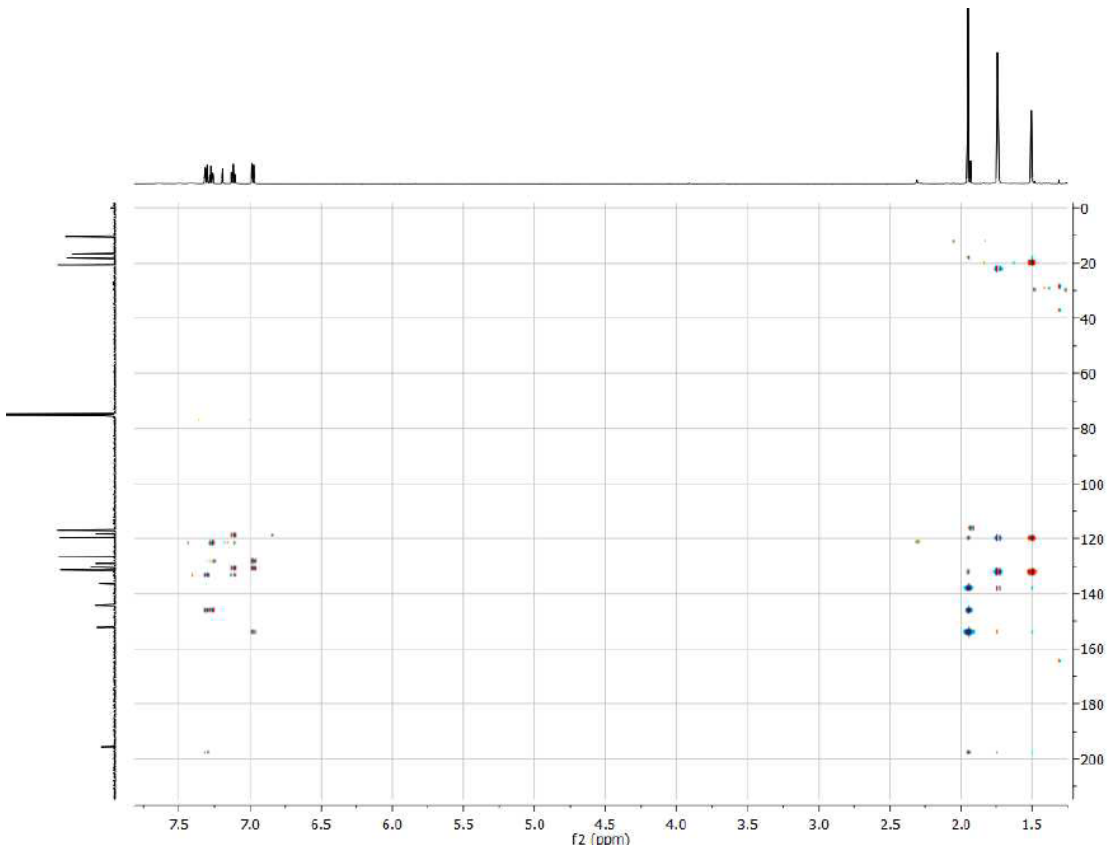



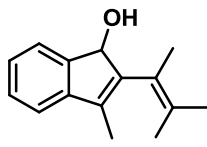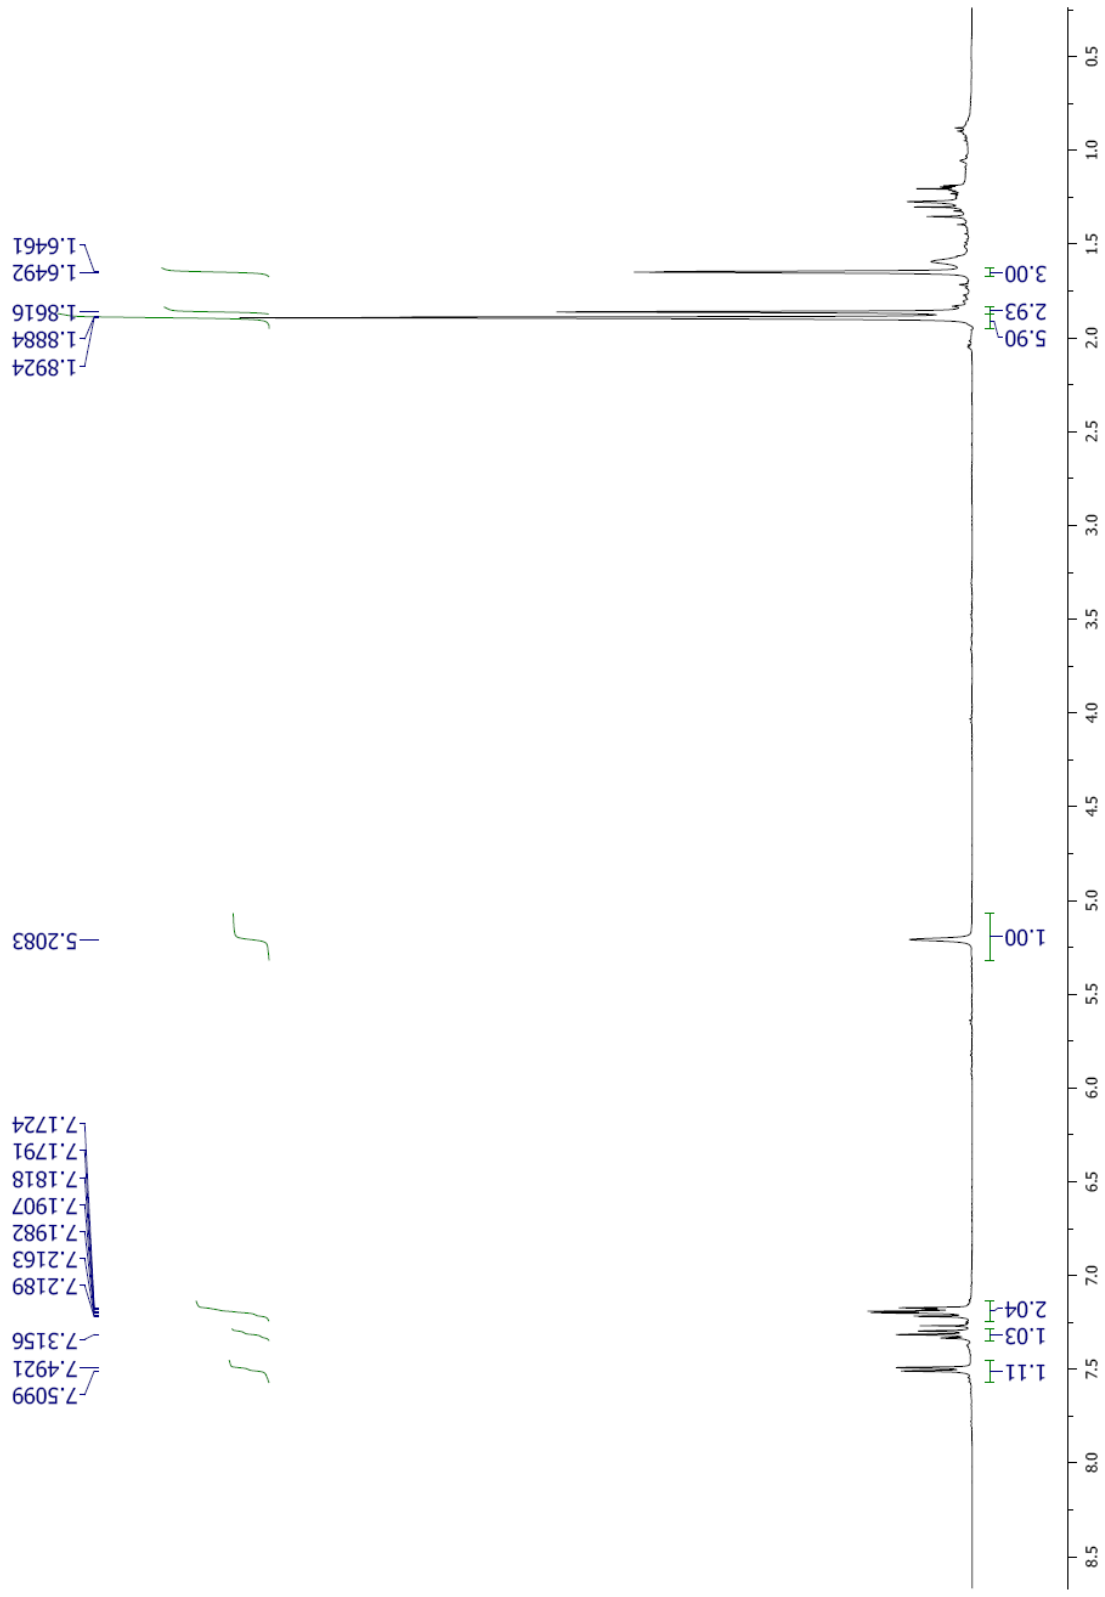

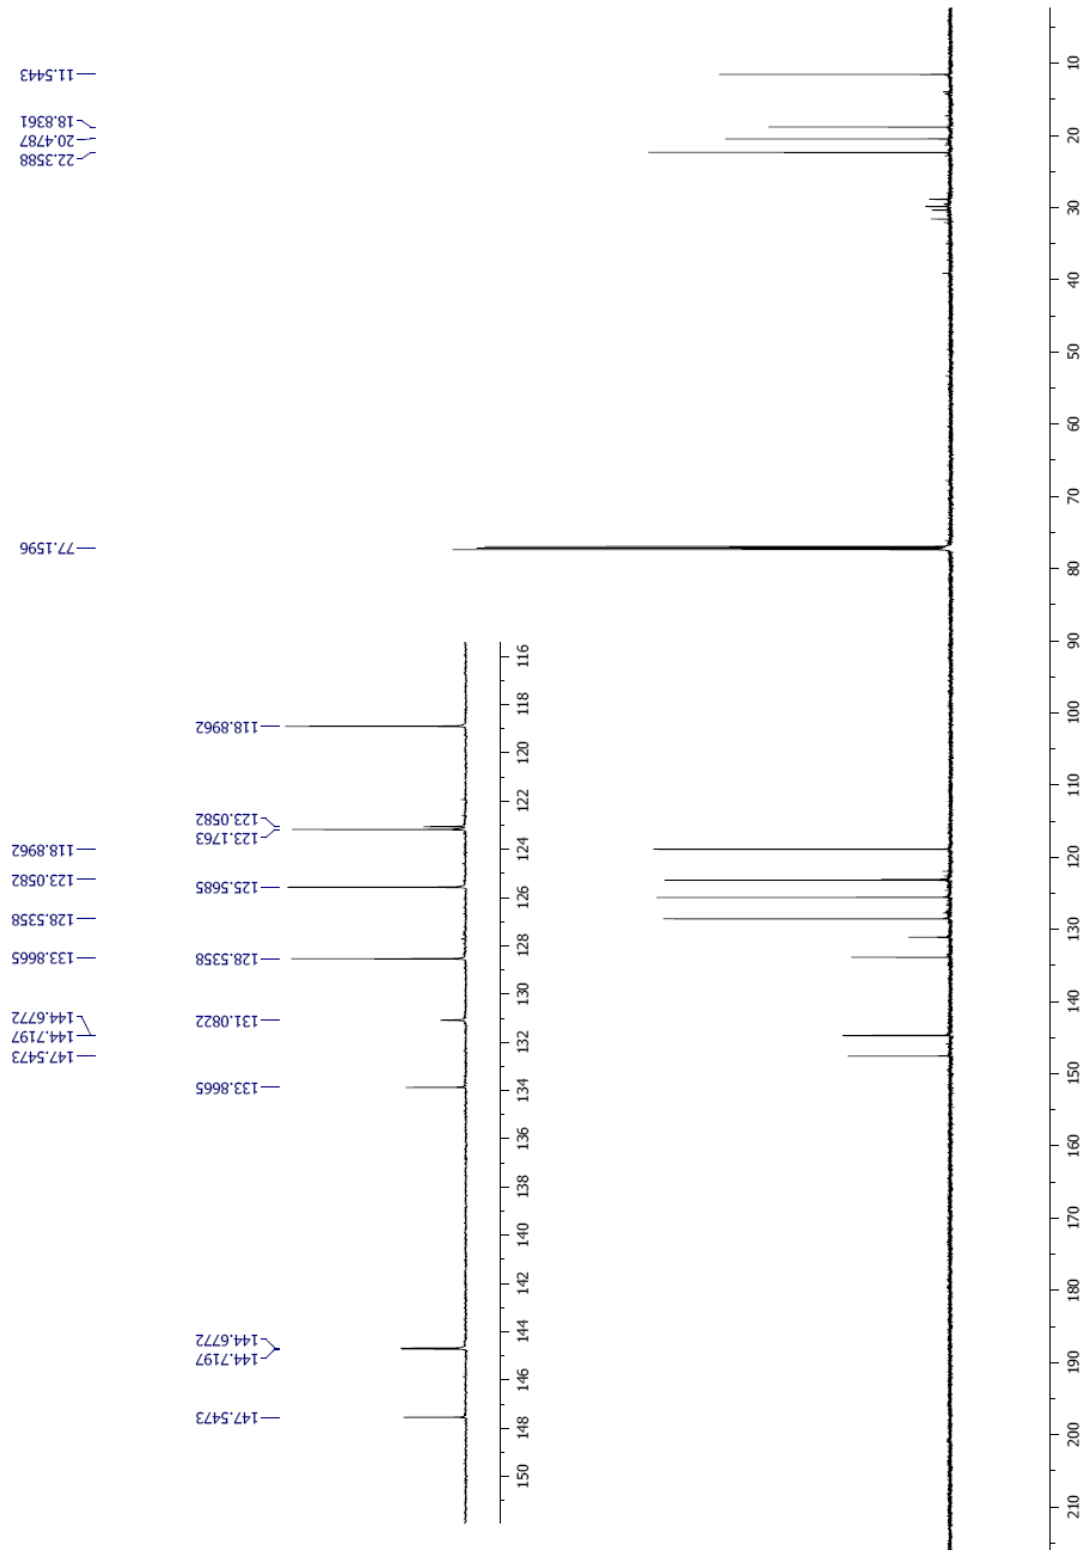

$^1\text{H}$  COSY (600 MHz)

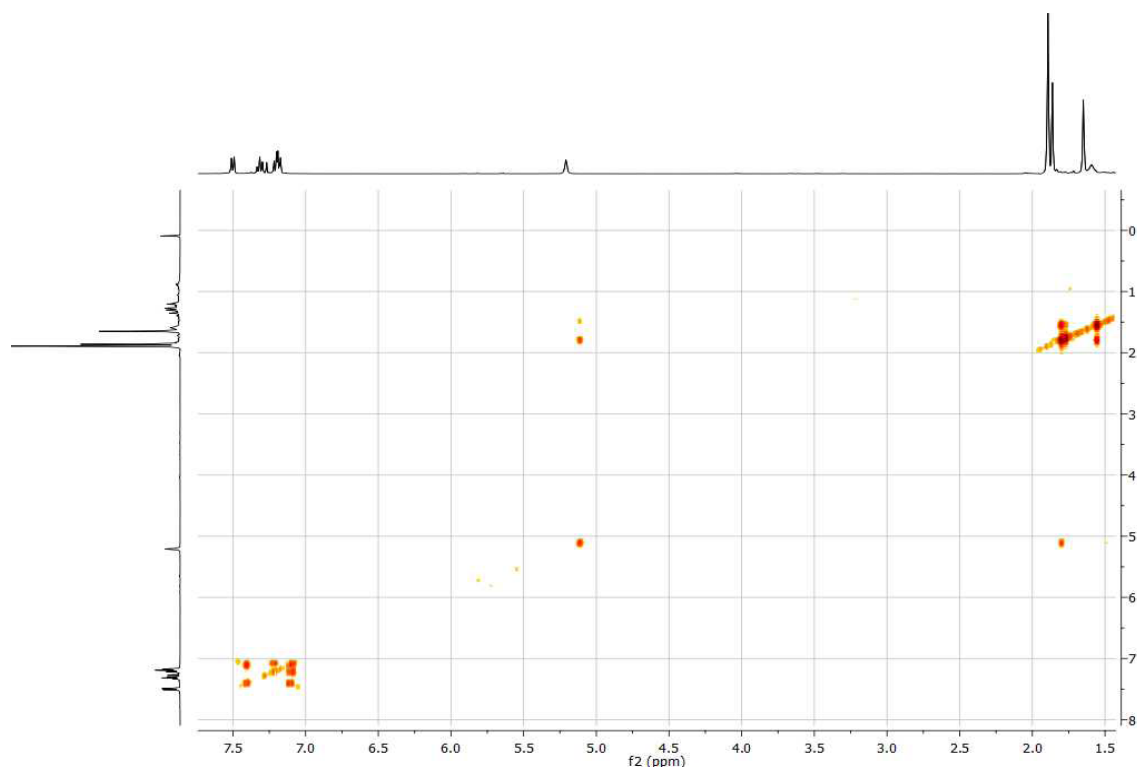

$^1\text{H}$  NOESY (600 MHz)

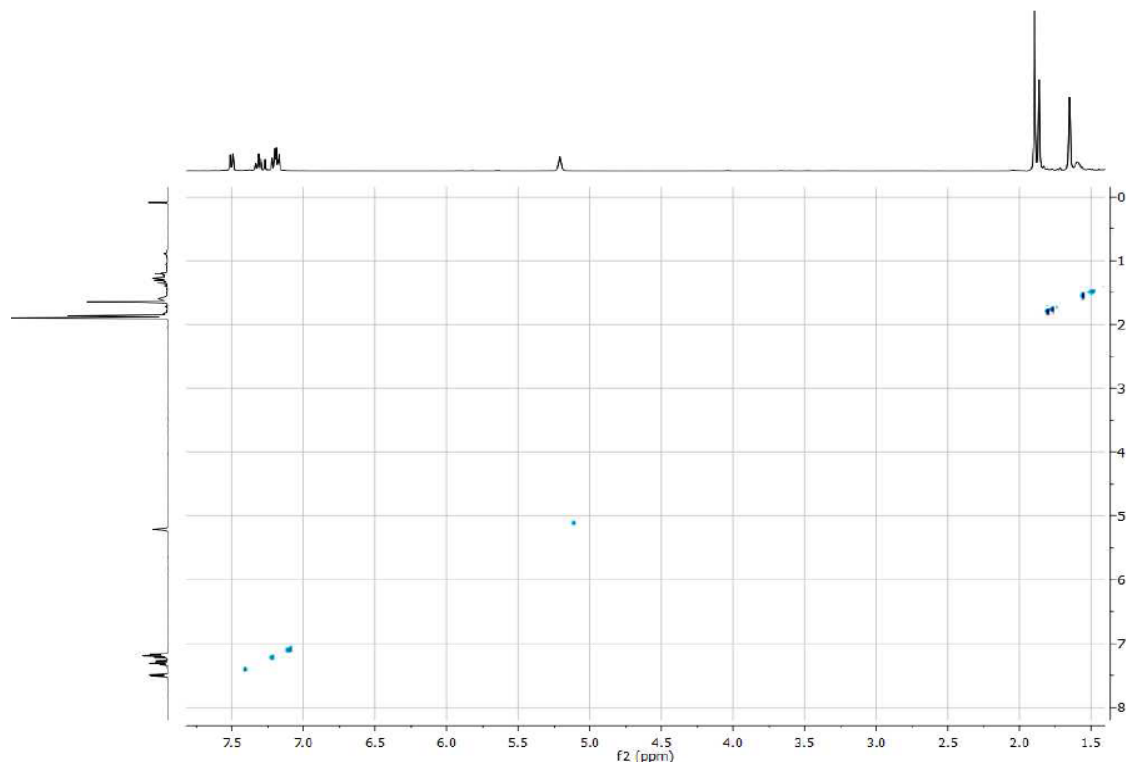

$^1\text{H}$ - $^{13}\text{C}$  HSQC (600 MHz)

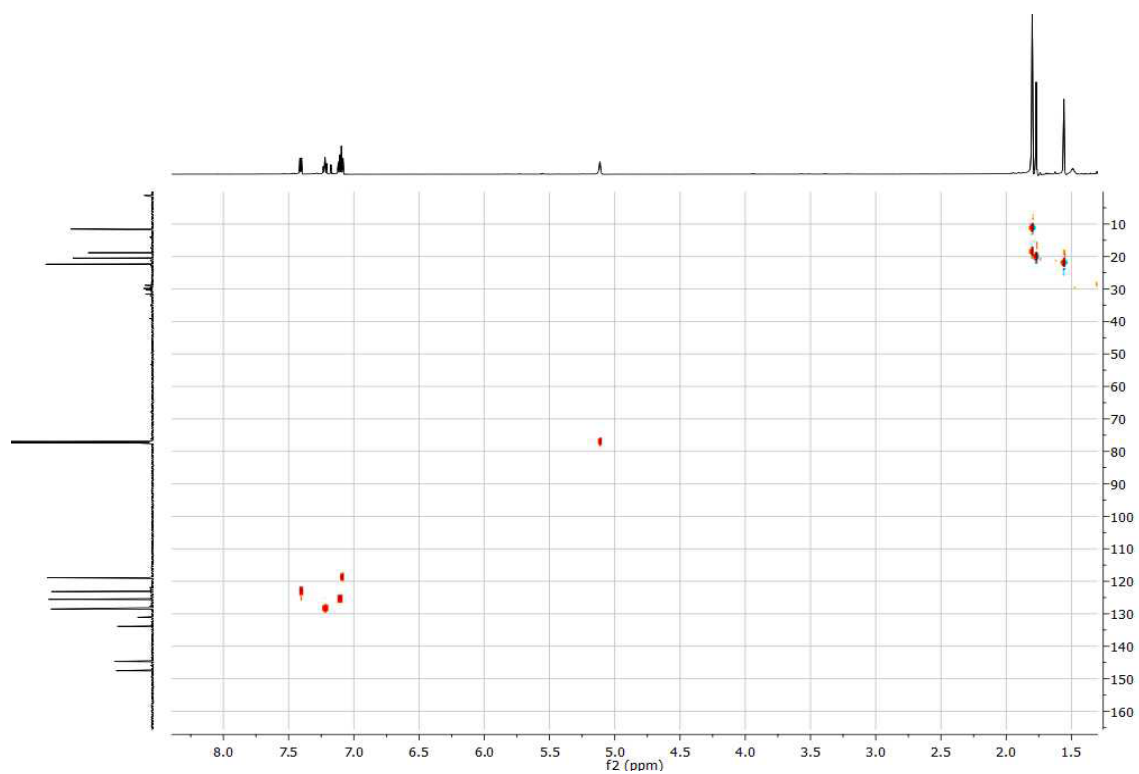

$^1\text{H}$ - $^{13}\text{C}$  HMBC (600 MHz)

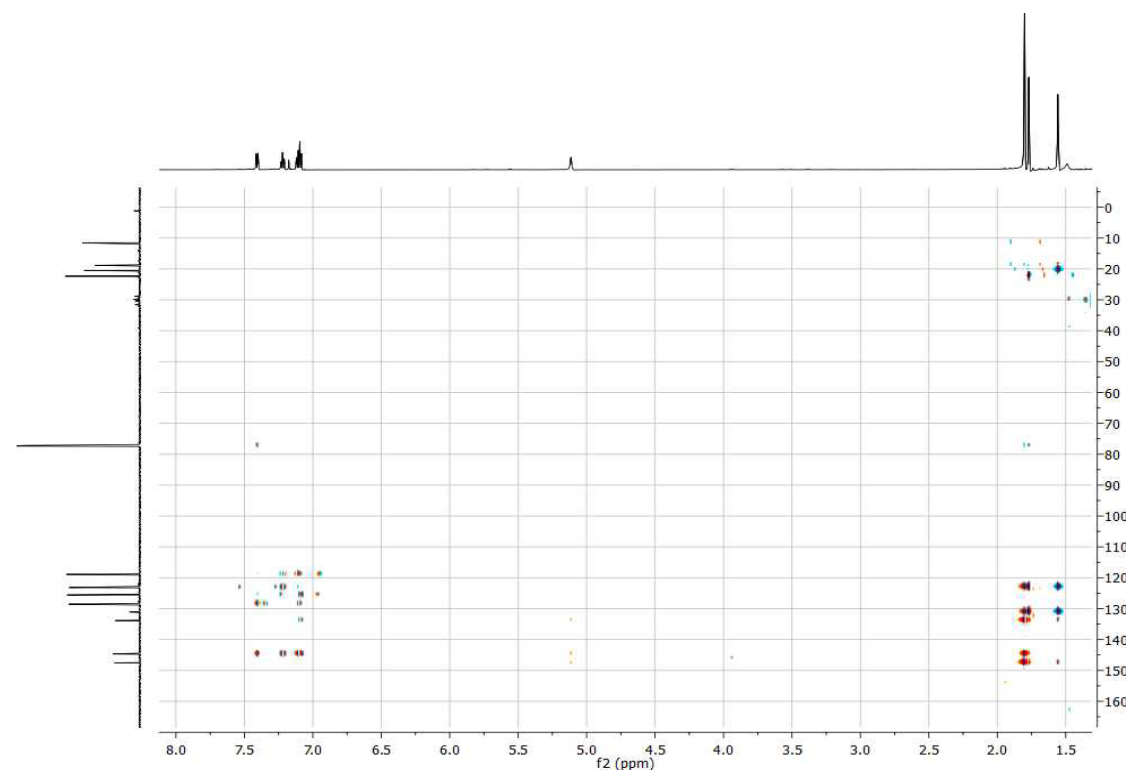

#### 4. X-ray molecular structures

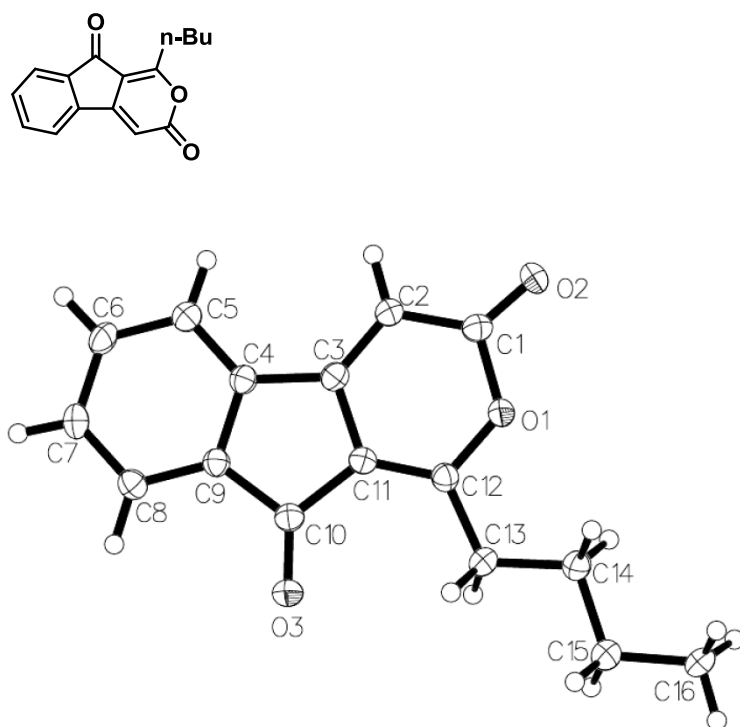

**Figure S1** Molecular structure of 1-butylindeno[2,1-c]pyran-3,9-dione (2a)  
CCDC-852796

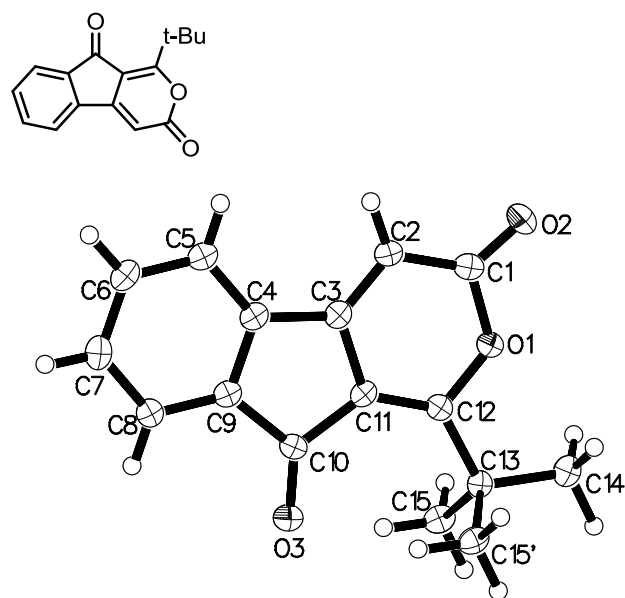

**Figure S2** Molecular structure of 1-tert-butylindeno[2,1-c]pyran-3,9-dione (2c)  
CCDC-857641

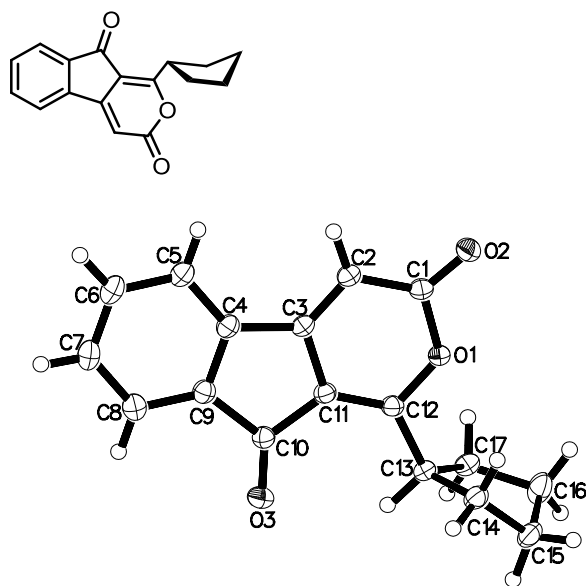

**Figure S3** Molecular structure of 1-cyclopentylindeno[2,1-c]pyran-3,9-dione (2d)  
CCDC-857642

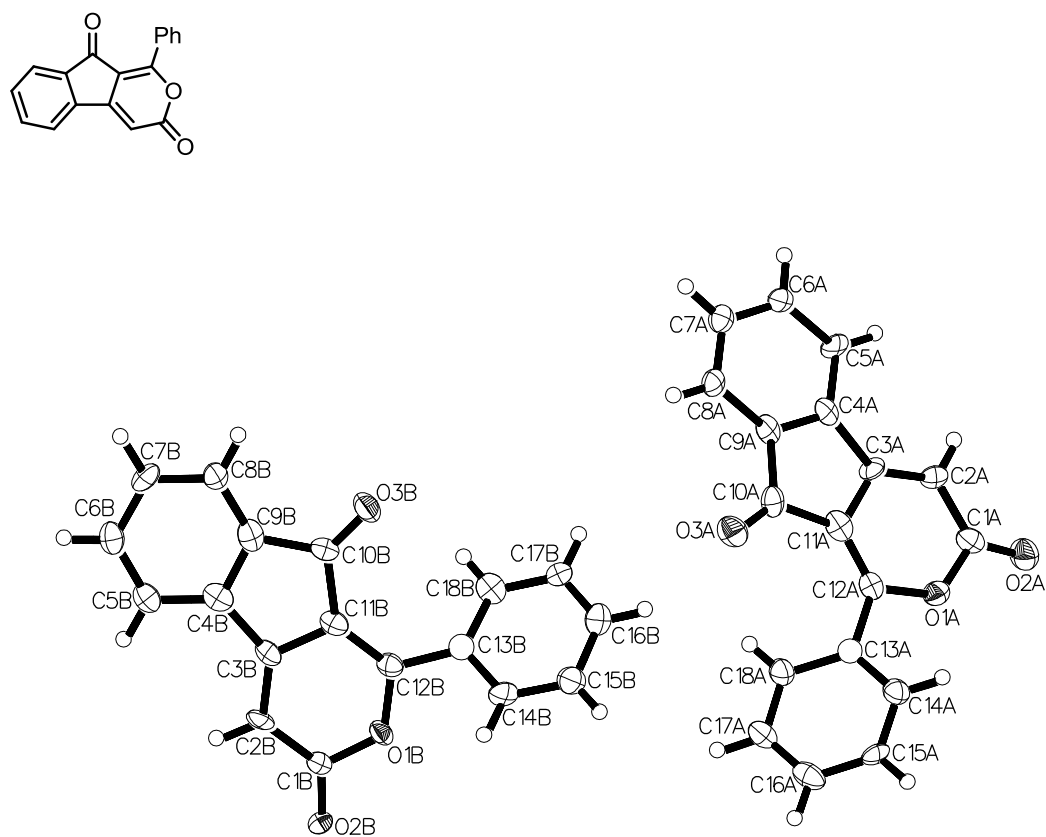

**Figure S4** Molecular structure of 1-phenylindeno[2,1-c]pyran-3,9-dione (2k)  
CCDC-895772

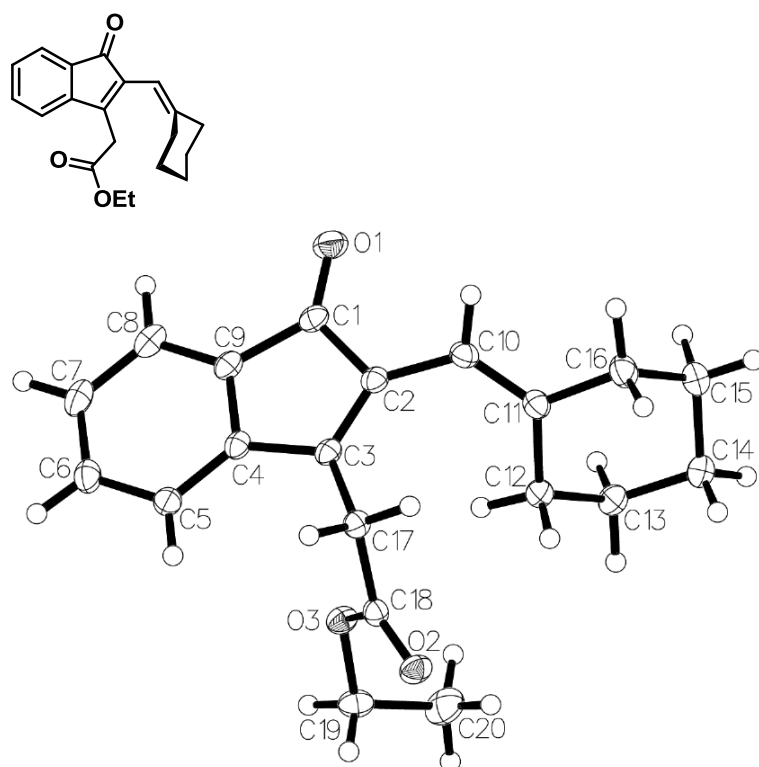

**Figure S5** Molecular structure of ethyl 2-(2-(cyclohexylidenemethyl)-1-oxo-1H-inden-3-yl)acetate (3e)  
CCDC-852797
